# Supplementary material for: Strategies for carbon regulation to enhance the efficient enrichment of energy storage materials in Tribonema minus
Source: Research Square preprint supplement (doi:10.21203/rs.3.rs-7739724/v1), 2025-11-12
Supplement: Supplementary file 1 [file 18e8afdf3c8c0174fef04c32.docx]

**Strategies for carbon regulation to enhance the efficient enrichment of energy storage materials in *Tribonema minus*.**

Luyun Caib,c#, Min Zhaoa,b#, Yu chuan Biana,b, Bingbing Dongd*, Ran Xub,c*

a College of Biology and Environment, Zhejiang Wanli University, Ningbo 315000, China

b Ningbo Global Innovation Center, Zhejiang University, Ningbo 315000, China

c. College of Biosystems Engineering and Food Science, Zhejiang University, Hangzhou 310058, China

d. College of Food and Pharmacy, Zhejiang Ocean University, Zhoushan 316021, China

**Supplementary Tables and their captions**

**Supplementary Table S1. Upregulation of metabolic substance name.(Red: up; Blue: down)**

| **ID** | **Substance name** | **type** | **P-VALUE** |
| --- | --- | --- | --- |
| **1** | **(E)-5-(1,2,4a,5-tetramethyl-2,3,4,7,8,8a-hexahydronaphthalen-1-yl)-3-methyl-pent-2-enoic acid** | **NEG** | **0.032167231** |
| **4** | **hexyl hexanoate** | **NEG** | **0.003222143** |
| **5** | **Dodecanoic acid** | **NEG** | **0.003222143** |
| **6** | **DEHP** | **POS** | **0.000446092** |
| **10** | **10-Undecenoic acid** | **NEG** | **0.032199958** |
| **20** | **2-hydroxydodecanoic acid** | **NEG** | **0.02213567** |
| **23** | **Adenosine monophosphate (AMP)** | **POS** | **0.037877907** |
| **24** | **Maleic acid** | **NEG** | **0.002948545** |
| **27** | **9-hydroxy-7-isopropyl-1,4a-dimethyl-2,3,4,9,10,10a-hexahydrophenanthrene-1-carboxylic acid** | **NEG** | **0.024387909** |
| **30** | **(10Z)-3a,10-dimethyl-1-prop-1-en-2-yl-2,3,4,5,6,7,8,9,12,12a-decahydro-1H-cyclopenta[11]annulene-6-carboxylic acid** | **NEG** | **0.032167231** |
| **40** | **2-Methylcaproic acid** | **NEG** | **0.033392953** |
| **41** | **Caproic acid** | **NEG** | **0.005499873** |
| **49** | **Arachidonic acid (AA)** | **NEG** | **0.032167231** |
| **51** | **Isocaproic acid** | **NEG** | **0.005499873** |
| **55** | **Hydroxyisocaproic acid** | **NEG** | **0.037161442** |
| **56** | **3-Amino-4-methylpentanoic acid** | **NEG** | **6.5547E-06** |
| **57** | **Pyruvaldehyde** | **NEG** | **0.008586473** |
| **60** | **1-phenylbutane-1,3-dione** | **POS** | **9.17724E-05** |
| **61** | **(1S,5R,9S,12S)-16-isopropyl-5,9-dimethyl-13,14-dioxatetracyclo[10.2.2.01,10.04,9]hexadec-15-ene-5-carboxylic acid** | **NEG** | **0.006714353** |
| **62** | **6,9a,11a-Trimethyl-4-oxo-1,2,3a,3b,5,5a,7,8,9,9b,10,11-dodecahydronaphtho[1,2-g][1]benzofuran-6-carboxylic acid** | **NEG** | **0.006714353** |
| **63** | **(1S,5S,8R,9S)-9-hydroxy-9-(hydroxymethyl)-2,5-dimethyltricyclo[6.3.0.01,5]undec-2-ene-3-carboxylic acid** | **NEG** | **0.030695783** |
| **64** | **(1S,5R,8S,9S)-7,9-dihydroxy-2,5,9-trimethyltricyclo[6.3.0.01,5]undec-2-ene-3-carboxylic acid** | **NEG** | **0.030695783** |
| **79** | **Deferiprone** | **POS** | **0.000937438** |
| **83** | **Indigo** | **POS** | **0.003690402** |
| **84** | **4'-Hydroxyacetophenone** | **NEG** | **0.017327668** |
| **86** | **3-Hydroxyacetophenone** | **NEG** | **0.017327668** |
| **89** | **1,3-Dicyclohexylurea** | **POS** | **0.004430239** |
| **91** | **(±)-Dihydroactinidiolide** | **POS** | **0.007075339** |
| **92** | **Sebacic acid** | **NEG** | **0.006961728** |
| **96** | **Phosphate** | **NEG** | **0.008260436** |
| **97** | **14,16-dihydroxy-4-methyl-3-oxabicyclo[10.4.0]hexadeca-1(12),13,15-trien-2-one** | **NEG** | **0.024007675** |
| **100** | **Fumaric acid** | **NEG** | **0.002948545** |
| **101** | **2-hydroxy-1',4,4'a-trimethyl-5'-oxo-4-vinyl-spiro[cyclopentane-1,6'-decalin]-1'-carboxylic acid** | **NEG** | **0.006714353** |
| **102** | **(3aR,5S,7S,8R,8aS,9aR)-7,8-dihydroxy-5,8a-dimethyl-1-methylene-4,5,5a,6,7,8,9,9a-octahydro-3aH-azuleno[6,5-b]furan-2-one** | **NEG** | **0.030695783** |
| **103** | **(1R,5R,8S)-2,3-dihydroxy-2,10,10-trimethyltricyclo[6.3.0.01,5]undec-6-ene-6-carboxylic acid** | **NEG** | **0.030695783** |
| **107** | **(6S,7aR)-6-hydroxy-4,4,7a-trimethyl-6,7-dihydro-5H-benzofuran-2-one** | **POS** | **0.029179608** |
| **108** | **1-Methylpyrrolidine** | **POS** | **1.51969E-05** |
| **109** | **Citric Acid** | **NEG** | **0.016995355** |
| **110** | **sn-Glycerol 3-phosphate** | **NEG** | **0.035703291** |
| **111** | **sn-Glycerol 1-phosphate** | **NEG** | **0.035703291** |
| **118** | **Nicotinamide adenine dinucleotide (NAD)** | **POS** | **0.039019264** |
| **119** | **L-Azetidine-2-carboxylic acid** | **POS** | **0.002055893** |
| **122** | **Norleucine** | **NEG** | **6.5547E-06** |
| **129** | **1-(2,3-dihydroxypropyl)tetradec-13-ynyl acetate** | **POS** | **0.004457401** |
| **131** | **Propionic acid** | **NEG** | **0.017594813** |
| **132** | **Mesaconic acid** | **NEG** | **0.023386569** |
| **133** | **Glutathione disulfide** | **NEG** | **0.001072983** |
| **136** | **2,2'-Iminodiacetic acid** | **NEG** | **0.033046318** |
| **137** | **4-Aminobutyric acid (GABA)** | **NEG** | **0.017457227** |
| **138** | **2-Hydroxypalmitic acid** | **NEG** | **0.011207259** |
| **141** | **3-Butynoic acid** | **POS** | **0.001530444** |
| **143** | **Leucine** | **NEG** | **6.5547E-06** |
| **144** | **Mono(2-ethylhexyl) phthalate** | **NEG** | **0.024007675** |
| **146** | **2,4-dihydroxyheptadec-16-ynyl acetate** | **POS** | **0.004457401** |
| **148** | **Phenylalanine** | **POS** | **0.006456275** |
| **149** | **o-Tyrosine** | **POS** | **5.5407E-05** |
| **153** | **EDTA** | **NEG** | **0.000499561** |
| **154** | **Arabinose** | **POS** | **8.28373E-05** |
| **155** | **Xylose** | **POS** | **8.28373E-05** |
| **156** | **(5S,9R)-14-(hydroxymethyl)-5,9-dimethyl-tetracyclo[11.2.1.01,10.04,9]hexadec-14-ene-5-carboxylic acid** | **NEG** | **0.001297454** |
| **161** | **Isoleucine** | **NEG** | **6.5547E-06** |
| **162** | **5-[(E)-4-carboxy-3-methyl-but-3-enyl]-1,4a-dimethyl-6-methylene-decalin-1-carboxylic acid** | **NEG** | **0.006714353** |
| **164** | **Aspartate** | **NEG** | **0.033046318** |
| **167** | **LPC(18:2/0:0)** | **POS** | **0.032605175** |
| **170** | **Sorbose** | **POS** | **0.009813987** |
| **171** | **Glucose** | **POS** | **0.009813987** |
| **179** | **7-(1-hydroxy-1-methyl-ethyl)-1,4a-dimethyl-2,3,4,9,10,10a-hexahydrophenanthrene-1-carboxylic acid** | **NEG** | **0.024387909** |
| **180** | **5,9-dimethyltetracyclo[11.2.1.01,10.04,9]hexadecane-5,14-dicarboxylic acid** | **NEG** | **0.006714353** |
| **181** | **3a,8-dihydroxy-3,5a,9-trimethyl-4,5,6,7,8,9b-hexahydro-3H-benzo[g]benzofuran-2-one** | **NEG** | **0.030695783** |
| **183** | **Hydroxyacetone** | **NEG** | **0.017594813** |
| **186** | **Tagatose** | **POS** | **0.009813987** |
| **187** | **Fructose** | **POS** | **0.009813987** |
| **188** | **Galactose** | **POS** | **0.009813987** |
| **189** | **Allose** | **POS** | **0.009813987** |
| **191** | **Iraldeine** | **POS** | **0.00274884** |
| **192** | **Norethindrone** | **POS** | **0.002635763** |
| **196** | **Proline** | **NEG** | **0.017756565** |
| **198** | **Phenylacetic acid** | **NEG** | **0.017327668** |
| **199** | **Tyrosine** | **POS** | **5.5407E-05** |
| **202** | **5-ketocaproate** | **NEG** | **0.040166648** |
| **203** | **3-Phosphoglyceric acid** | **NEG** | **0.044998792** |
| **205** | **Indirubin** | **POS** | **0.003690402** |
| **214** | **5-Hydroxymethylfurfural** | **NEG** | **0.000399127** |
| **216** | **alpha-Ketoglutaric acid (alpha-KG)** | **NEG** | **0.006175377** |
| **217** | **Valine** | **NEG** | **0.008607061** |
| **218** | **Uridine 5'-monophosphate (UMP)** | **NEG** | **0.02726595** |
| **219** | **Pyrrolidine** | **POS** | **0.004961707** |
| **223** | **4-(dimethylamino)butanoate** | **NEG** | **6.5547E-06** |
| **224** | **Caplamin** | **NEG** | **6.5547E-06** |
| **226** | **4-(Methylamino)butanoic acid** | **NEG** | **0.008607061** |
| **227** | **Fagomine** | **POS** | **3.07523E-05** |
| **228** | **Choline** | **POS** | **0.000393273** |
| **229** | **Betaine** | **POS** | **8.5569E-05** |
| **232** | **Adenosine 3'-monophosphate** | **POS** | **0.037877907** |
| **235** | **5-Aminopentanoic acid** | **NEG** | **0.008607061** |
| **238** | **Flavin mononucleotide (FMN)** | **POS** | **0.00294034** |
| **239** | **Phe-Ala** | **POS** | **0.002484232** |
| **240** | **Ala-Gly** | **NEG** | **0.00482434** |
| **241** | **Carnitine** | **POS** | **0.009168335** |
| **243** | **(4aR,5S)-9-hydroxy-3,4a,5-trimethyl-4,5,6,7,8,8a,9,9a-octahydrobenzo[f]benzofuran-2-one** | **POS** | **0.028840949** |
| **244** | **Malic acid** | **NEG** | **0.012314557** |
| **249** | **Itaconic acid** | **NEG** | **0.023386569** |
| **250** | **4-[1-hydroxy-2-(methylamino)ethyl]benzene-1,2-diol** | **NEG** | **4.10717E-05** |
| **251** | **Daltogen** | **POS** | **1.71671E-05** |
| **252** | **Glycerophosphocholine** | **POS** | **0.007569947** |
| **253** | **Spermidine** | **POS** | **0.012245851** |
| **254** | **UDP-galactose** | **NEG** | **0.000249105** |
| **255** | **Uridine diphosphate glucose (UDP-glucose)** | **NEG** | **0.000249105** |
| **258** | **Citraconic acid** | **NEG** | **0.023386569** |
| **263** | **Methyl beta-D-glucopyranoside** | **NEG** | **0.026154491** |
| **264** | **UDP-N-acetylglucosamine** | **NEG** | **0.024220459** |
| **268** | **3-Amino-3-(4-hydroxyphenyl)propanoic acid** | **POS** | **5.5407E-05** |
| **269** | **1-Arachidonyl-sn-glycerol (1-AG)** | **POS** | **0.020807296** |
| **270** | **Tryptophan** | **POS** | **0.00077924** |
| **271** | **Acetylcarnitine (Car(2:0))** | **POS** | **3.24373E-05** |
| **272** | **Mannitol** | **NEG** | **0.001330033** |
| **274** | **5-(1,2,4a,5-tetramethyl-7-oxo-3,4,8,8a-tetrahydro-2H-naphthalen-1-yl)-3-methyl-pentanoic acid** | **POS** | **0.020969664** |
| **276** | **2,4-dihydroxy-3,5,6-trimethyl-benzoic acid** | **NEG** | **0.00809474** |
| **277** | **Glucose 1-phosphate** | **NEG** | **0.019774051** |
| **279** | **Isocitric acid** | **NEG** | **0.016995355** |
| **282** | **Galactose 1-phosphate** | **NEG** | **0.019774051** |
| **283** | **gamma-Glutamylleucine** | **NEG** | **0.004826299** |
| **285** | **Rhamnose** | **POS** | **0.001951397** |
| **286** | **all-trans-5,6-Epoxyretinoic acid** | **NEG** | **0.024387909** |
| **288** | **Galactitol** | **NEG** | **0.001330033** |
| **291** | **4-[2-[(1R,4aS,5R,8aS)-6-hydroxy-5-(hydroxymethyl)-5,8a-dimethyl-2-methylene-decalin-1-yl]ethyl]-2H-furan-5-one** | **NEG** | **0.006714353** |
| **296** | **Levonordefrin** | **NEG** | **4.10717E-05** |
| **297** | **Glucitol** | **NEG** | **0.001330033** |
| **299** | **Glutamine** | **POS** | **0.00257392** |
| **300** | **1,7-bis(4-hydroxyphenyl)heptane-3,5-diol** | **NEG** | **0.037953871** |
| **301** | **Dehydroascorbic acid (Oxidized vitamin C)** | **NEG** | **0.016530491** |
| **302** | **Tyramine** | **POS** | **0.008933845** |
| **307** | **Gly-Ala** | **NEG** | **0.00482434** |
| **308** | **N-Methyl-L-asparagine** | **POS** | **0.00257392** |
| **310** | **Methylimidazoleacetic acid** | **POS** | **0.010441918** |
| **313** | **5,7-dihydroxy-4-(4-methoxyphenyl)chroman-2-one** | **NEG** | **0.003605086** |
| **318** | **(2R)-7-hydroxy-8-(2-hydroxyethyl)-5-methoxy-2-methyl-chroman-4-one** | **POS** | **0.007712633** |
| **319** | **Isovalerylcarnitine (Car(5:0))** | **POS** | **0.008049336** |
| **320** | **4-[2-[(1R,4aS,5R,8aS)-5-(hydroxymethyl)-5,8a-dimethyl-2-methylene-decalin-1-yl]ethyl]-2H-furan-5-one** | **NEG** | **0.001297454** |
| **323** | **trans-Vaccenic acid** | **NEG** | **0.046627654** |
| **324** | **Oleic acid** | **NEG** | **0.046627654** |
| **325** | **1,4a,7-trimethyl-7-vinyl-3,4,6,8,8a,9,10,10a-octahydro-2H-phenanthrene-1-carboxylic acid** | **NEG** | **0.044339949** |
| **326** | **Kaurenoic acid** | **NEG** | **0.044339949** |
| **327** | **Isopimaric acid** | **NEG** | **0.044339949** |
| **328** | **Eicosapentaenoic acid** | **NEG** | **0.044339949** |
| **329** | **(5R,9S)-5,9-dimethyl-14-methylene-tetracyclo[11.2.1.01,10.04,9]hexadecane-5-carboxylic acid** | **NEG** | **0.044339949** |
| **337** | **3-(2,5-Dimethoxyphenyl)propionic acid** | **NEG** | **0.019345307** |
| **339** | **2-[(3S,3aR,5R,7aS)-3a-acetyl-3-hydroxy-7a-methyl-2,3,4,5,6,7-hexahydro-1H-inden-5-yl]prop-2-enoic acid** | **NEG** | **0.030695783** |
| **340** | **(8E)-10-hydroxy-5,9,12,13,16-pentamethyl-4-oxatricyclo[10.3.1.03,5]hexadeca-1(15),8-dien-2-one** | **NEG** | **0.001297454** |
| **341** | **Valerylcarnitine** | **POS** | **0.008049336** |
| **342** | **Stearic acid** | **NEG** | **0.046334852** |
| **343** | **Riboflavin** | **NEG** | **0.008162339** |
| **344** | **2'-O-Methyladenosine** | **POS** | **0.002019127** |
| **345** | **3'-O-Methyladenosine** | **POS** | **0.002019127** |
| **346** | **4-Chlorophenylalanine** | **POS** | **0.000438316** |
| **351** | **5-butyl-4-methoxy-6-methyl-pyran-2-one** | **POS** | **0.029179608** |
| **352** | **Dibutyl phthalate** | **POS** | **0.003494091** |
| **353** | **Butyl isobutyl phthalate** | **POS** | **0.003494091** |
| **354** | **2-Hydroxyphenylacetic acid** | **NEG** | **0.018627815** |
| **356** | **Biotin** | **NEG** | **0.00019566** |
| **357** | **5'-Methylthioadenosine** | **POS** | **6.61022E-05** |
| **358** | **(2S)-5,7-dimethoxy-2-(4-methoxyphenyl)chroman-4-one** | **NEG** | **0.011515391** |
| **359** | **(3aS,5R,7S,7aR)-2,7-diacetyloxy-3-formyl-3a-hydroxy-1,1,3,5-tetramethyl-2,4,5,6,7,7a-hexahydroindene-4-carboxylic acid** | **NEG** | **0.000287662** |
| **361** | **5-Hydroxyhexanoic acid** | **NEG** | **0.037161442** |
| **364** | **3-Succinoylpyridine** | **NEG** | **0.000268404** |
| **372** | **Xanthoxylin** | **NEG** | **0.00809474** |
| **374** | **Monobutyl phthalate** | **POS** | **0.002758845** |
| **376** | **4-methyl-3-sec-butyl-2,3-dihydropyrrolo[3,4-b]quinoline-1,9-dione** | **POS** | **0.005830976** |
| **378** | **2-Ethyl-2-hydroxybutyric acid** | **NEG** | **0.037161442** |
| **381** | **14-hydroxy-16-methoxy-4-methyl-3-oxabicyclo[10.4.0]hexadeca-1(12),13,15-trien-2-one** | **NEG** | **0.01506644** |
| **383** | **2-Hydroxymethyl benzoic acid** | **NEG** | **0.018627815** |
| **388** | **12-Hydroxydodecanoic acid** | **NEG** | **0.02213567** |
| **391** | **6-[(3E,5E,7S)-5,7-dimethyl-2-oxo-nona-3,5-dienyl]-2,4-dihydroxy-3-methyl-benzaldehyde** | **NEG** | **0.037953871** |
| **393** | **Neantine** | **POS** | **0.002758845** |
| **395** | **Fedratinib** | **POS** | **0.003159417** |
| **403** | **Benzamide** | **POS** | **0.000923235** |
| **405** | **4-methoxy-6-methyl-7,8-dihydro-5H-[1,3]dioxolo[4,5-g]isoquinoline** | **POS** | **0.001468168** |
| **406** | **Tyrosylglutamic acid** | **NEG** | **0.002061372** |
| **408** | **6-(hydroxymethyl)pyridin-3-ol** | **POS** | **0.031703169** |
| **411** | **(9a-hydroxy-3,8a-dimethyl-5-methylene-2-oxo-4,4a,6,7,8,9-hexahydrobenzo[f]benzofuran-8-yl) acetate** | **POS** | **0.029484821** |
| **413** | **methyl (2S)-5-oxopyrrolidine-2-carboxylate** | **POS** | **0.031703169** |
| **420** | **methyl (E)-2-[(2S,3R,12bR)-3-ethyl-1,2,3,4,6,7,12,12b-octahydroindolo[2,3-a]quinolizin-2-yl]-3-methoxy-prop-2-enoate** | **POS** | **0.049970354** |
| **424** | **7,12-dihydroxy-4,5,5,14-tetramethyl-3,10-dioxatetracyclo[6.6.1.02,6.011,15]pentadeca-1(15),2(6),7,11,13-pentaen-9-one** | **NEG** | **0.015504433** |
| **427** | **Saquinavir** | **NEG** | **0.002777723** |
| **430** | **2-Furoylglycine** | **NEG** | **3.14087E-05** |
| **433** | **Pinobanksin** | **NEG** | **0.023872736** |
| **434** | **Cyclamic acid** | **NEG** | **0.000268404** |
| **436** | **Azaleatin** | **NEG** | **0.004721961** |
| **439** | **6-hydroxy-1,5-dimethoxy-xanthen-9-one** | **NEG** | **0.023872736** |
| **441** | **3,7-dihydroxy-9-methoxy-1-methyl-benzo[c]chromen-6-one** | **NEG** | **0.023872736** |
| **444** | **N-Ethylmaleimide** | **POS** | **0.031703169** |
| **445** | **arborinine** | **POS** | **0.039263334** |
| **446** | **1-Monopalmitin** | **POS** | **0.001839038** |
| **448** | **Methyl [(1S,3S,7R,8R,9R,12S,13S)-13-(3-furyl)-6,6,8,12-tetramethyl-17-methylene-5,15-dioxo-2,14-dioxatetracyclo[7.7.1.0.1,12..0.3,8.]heptadec-7-yl](hydroxy)acetate** | **POS** | **0.018488158** |
| **452** | **13-OxoODE** | **NEG** | **0.013774432** |
| **463** | **(3aS,4S,7aR)-4-Hydroxy-5-[(2S)-5-hydroxy-2-pentanyl]-6-methyl-3-methylene-3a,4,7,7a-tetrahydro-1-benzofuran-2(3H)-one** | **POS** | **1.37263E-07** |
| **465** | **5-hexyltetrahydrofuran-2-one** | **NEG** | **0.000469697** |
| **471** | **Astaxanthin** | **POS** | **0.021425989** |
| **473** | **3-Methylcyclohexanol** | **POS** | **0.005534274** |
| **475** | **2-Methylbenzoic_acid** | **NEG** | **2.61402E-05** |
| **476** | **4-HYDROXYCYCLOHEXANECARBOXYLIC ACID** | **NEG** | **0.008682579** |
| **477** | **N-Methyl-2-pyrrolidone** | **POS** | **0.006662334** |
| **480** | **2-Naphthalenecarboxylic acid, 1-[2-(3-furanyl)ethyl]-1,2,3,4,4a,7,8,8a-octahydro-1,4a,5-trimethyl-, (1R,2R,4aR,8aR)-** | **POS** | **0.021155095** |
| **481** | **Schisanhenol** | **POS** | **0.007730364** |
| **482** | **2,6-dihydroxy-7-methoxy-1,1,4a-trimethyl-3,4,10,10a-tetrahydro-2H-phenanthren-9-one** | **POS** | **0.007675398** |
| **489** | **PC(34:4)** | **POS** | **0.027954978** |
| **497** | **Hulupinic acid** | **NEG** | **0.000372004** |
| **499** | **3,3',4,4'-Tetrahydroxy-5,5'-diisopropyl-2,2'-dimethylbiphenyl** | **POS** | **0.008444634** |
| **501** | **1-(2-Furanyl)-1-pentanone** | **POS** | **0.000182104** |
| **505** | **Coniine** | **POS** | **0.007383767** |
| **506** | **Rhodoxanthin** | **POS** | **0.007365353** |
| **509** | **Premarrubiin** | **POS** | **0.011185371** |
| **511** | **Pterosin B** | **POS** | **0.009937025** |
| **512** | **Velutin** | **POS** | **0.000398578** |
| **514** | **Pterosin A** | **POS** | **0.001854745** |
| **515** | **(2Z,6E,10Z)-12-acetoxy-10-(acetoxymethyl)-6-methyl-2-(4-methylpent-3-enyl)dodeca-2,6,10-trienoic acid** | **NEG** | **0.007221606** |
| **517** | **Phthalic acid** | **POS** | **0.003872237** |
| **520** | **Osmorhizole** | **POS** | **3.459E-05** |
| **521** | **2-Acetyl-1-ethylpyrrole** | **POS** | **0.00059555** |
| **522** | **Epigallocatechin** | **NEG** | **0.000796963** |
| **526** | **METHYL BETA-GALACTOSIDE** | **NEG** | **0.001559338** |
| **528** | **1-Palmitoyllysophosphatidate** | **NEG** | **0.014857172** |
| **531** | **GLYCEROL-MYRISTATE** | **POS** | **0.001432917** |
| **533** | **Methylephedrine** | **POS** | **0.013643053** |
| **534** | **Bergamottin** | **POS** | **0.008769386** |
| **541** | **Di-n-pentyl_phthalate** | **POS** | **0.005370489** |
| **542** | **ROTENONE** | **POS** | **0.00362775** |
| **546** | **2,4-dihydroxyheptadec-16-enyl acetate** | **POS** | **0.015203373** |
| **551** | **LPE(18:3)** | **POS** | **0.003831307** |
| **552** | **Secoeremopetasitolide_B** | **POS** | **0.025518291** |
| **559** | **Adonixanthin/_4-Ketozeaxanthin** | **POS** | **0.032885169** |
| **562** | **LPE(20:5)** | **POS** | **0.001172405** |
| **564** | **Cinnamaldehyde** | **POS** | **0.022544903** |
| **566** | **Salicylic alcohol** | **NEG** | **0.000904589** |
| **568** | **beta-D-Glucopyranoside, (1aS,1bS,2S,5aR,6S,6aS)-6-[[6-deoxy-3-O-[(2E)-3-(3,4-dihydroxyphenyl)-1-oxo-2-propen-1-yl]-alpha-L-mannopyranosyl]oxy]-1a,1b,2,5a,6,6a-hexahydro-1a-(hydroxymethyl)oxireno[4,5]cyclopenta[1,2-c]pyran-2-yl** | **POS** | **0.031177342** |
| **570** | **ANISOCOUMARIN H** | **POS** | **0.000424416** |
| **572** | **LPE(22:6)** | **POS** | **0.036411382** |
| **575** | **Myricetin** | **POS** | **0.040713281** |
| **576** | **7-[(2E)-3,7-dimethylocta-2,6-dienoxy]chromen-2-one [IIN-based on** | **POS** | **0.003668799** |
| **577** | **Syringic acid** | **POS** | **0.002022852** |
| **578** | **Methyl gallate** | **POS** | **0.00739073** |
| **579** | **Maoecrystal A** | **POS** | **0.009504939** |
| **580** | **Osajin** | **POS** | **0.003074459** |
| **586** | **Isobavachalcone** | **POS** | **0.000145318** |
| **587** | **Bavachin** | **POS** | **0.012552128** |
| **589** | **PC(18:0/18:1(9Z))** | **POS** | **0.00896669** |
| **594** | **Dehydrotestosterone** | **POS** | **0.040003029** |
| **597** | **1,2-dihydroxyheptadec-16-en-4-yl acetate** | **POS** | **0.001338492** |
| **598** | **SCLAREOLIDE** | **POS** | **0.001165493** |
| **599** | **2-METHOXYCINNAMALDEHYDE** | **POS** | **0.001717555** |
| **600** | **10beta-Hydroxy-6beta-isobutyrylfuranoeremophilane** | **POS** | **0.046070383** |
| **601** | **Cubebinin** | **POS** | **0.002510767** |
| **603** | **Salsoline** | **POS** | **0.000677594** |
| **606** | **Diatoxanthin/_7,8-Didehydrozeaxanthin** | **POS** | **0.010986965** |
| **611** | **LPC(17:1)** | **POS** | **0.00455104** |
| **612** | **AVOCADYNE** | **POS** | **0.0024866** |
| **613** | **Methylxanthoxylin** | **POS** | **0.000757328** |
| **615** | **Linderane** | **POS** | **0.002409606** |
| **624** | **TMB** | **POS** | **0.00085168** |
| **627** | **Sophocarpine** | **POS** | **0.007016461** |
| **631** | **Wulignan A1** | **POS** | **0.003321574** |
| **632** | **Carnosic acid diacetate methyl ester** | **POS** | **0.013867755** |
| **633** | **(4S,4aR,8aS)-4-[(3R)-3-hydroxy-3-methylpent-4-enyl]-3,4a,8,8-tetramethyl-5,6,7,8a-tetrahydro-4H-naphthalen-1-one** | **POS** | **0.00283078** |
| **635** | **threo-Syringoylglycerol** | **POS** | **0.020342938** |
| **637** | **2,3',4,6-Tetrahydroxybenzophenone** | **NEG** | **0.013391693** |
| **640** | **Coixinden_B** | **POS** | **3.86357E-05** |
| **641** | **Isofraxidin** | **POS** | **0.01165645** |
| **642** | **1H-indole-3-carboxamide** | **POS** | **0.000647225** |
| **643** | **Sparteine** | **POS** | **0.007726651** |
| **644** | **norambreinolide** | **POS** | **0.016683911** |
| **648** | **8,10-Octadecadiynoic_acid** | **POS** | **0.000197902** |
| **649** | **8-Gingerol** | **POS** | **0.021003075** |
| **650** | **Harmalol** | **POS** | **0.005265056** |
| **652** | **8-Azaguanine** | **POS** | **0.000206513** |
| **653** | **Chromocarb** | **POS** | **0.000495279** |
| **654** | **[(4E,6E,12E)-3-acetoxytetradeca-4,6,12-trien-8,10-diynyl] acetate** | **POS** | **0.004853341** |
| **655** | **Rosifoliol** | **POS** | **0.006449294** |
| **657** | **dehydrocostus lactone** | **POS** | **0.001200438** |
| **658** | **(E)-5-hydroxy-1,7-diphenylhept-1-en-3-one [IIN-based on** | **POS** | **0.033229042** |
| **659** | **Acoramone** | **POS** | **0.044586464** |
| **660** | **cuminyl alcohol** | **NEG** | **0.000191935** |
| **661** | **N-Acetyl-DL-serine** | **NEG** | **0.000147791** |
| **662** | **Uncarine c** | **POS** | **0.000857536** |
| **664** | **Ethyl_sorbate** | **POS** | **0.001644232** |
| **668** | **Rhodinyl Acetate** | **POS** | **0.000419908** |
| **669** | **3-propan-2-yl-2,3,6,7,8,8a-hexahydropyrrolo[1,2-a]pyrazine-1,4-dione** | **POS** | **0.02259414** |
| **671** | **PETROSELINIC ACID** | **POS** | **0.00251617** |
| **676** | **(3S)-all-trans-3-hydroxyretinal** | **POS** | **2.0059E-05** |
| **677** | **monolinolein** | **POS** | **0.002136216** |
| **678** | **(3b,16b,20R)-Pregn-5-ene-3,16,20-triol_3-glucoside** | **POS** | **0.004367472** |
| **679** | **PERSEITOL** | **NEG** | **0.001010431** |
| **681** | **(-)-12-hydroxyjasmonic acid** | **NEG** | **0.011549386** |
| **683** | **11Z-hexadecenoic_acid** | **POS** | **0.019839105** |
| **688** | **3-O-Acetylpinobanksin** | **NEG** | **0.000336655** |
| **689** | **3,4,5-trimethoxycinnamic acid** | **NEG** | **0.018360217** |
| **691** | **Canavanine** | **POS** | **0.012083881** |
| **693** | **Annuionone_C** | **POS** | **0.000319206** |
| **694** | **Benzoylmalic_acid** | **POS** | **0.000760614** |
| **699** | **(3aR,4R,5aS,6S,9aR,9bS)-4,6-dihydroxy-5a,9-dimethyl-3-methylidene-4,5,6,7,9a,9b-hexahydro-3aH-benzo[g][1]benzofuran-2-one** | **POS** | **0.001914961** |
| **702** | **Capsorubin** | **POS** | **0.011731042** |
| **707** | **Ambronide** | **POS** | **0.002154971** |
| **708** | **Annuionone_A** | **POS** | **0.001071991** |
| **710** | **Obtusilactone_A** | **POS** | **0.002555926** |
| **712** | **1a,5,7a-Trimethyl-2,2a,6,6a,7a,8,9,9a-octahydrobisoxireno[4,5:8,9]cyclodeca[1,2-b]furan-4(1aH)-one** | **POS** | **0.002421802** |
| **713** | **Capsanthone-3,6-epoxide** | **POS** | **0.008648869** |
| **718** | **Helveticoside** | **POS** | **0.004791152** |
| **720** | **Grayanotoxane-3,5,6,10,14,16-hexol, 14-acetate, (3beta,6beta,14R,16alpha)-** | **POS** | **0.008747921** |
| **721** | **Camptothecin** | **POS** | **0.03906379** |
| **724** | **CRUSTECDYSONE** | **POS** | **0.000417462** |
| **725** | **Corchorosol_A** | **POS** | **0.005052598** |
| **726** | **Azadirachtin** | **POS** | **0.031296752** |
| **729** | **4',7-Di-O-methylnaringenin** | **POS** | **0.000698027** |
| **731** | **D-(-)-salicin** | **POS** | **0.039881758** |
| **739** | **6,8-Diprenylorobol** | **POS** | **0.009042321** |
| **743** | **1,2,3,4-Tetramethoxy-5-(2-propenyl)benzene** | **POS** | **0.000929499** |
| **744** | **neoandrographolide** | **POS** | **0.007824226** |
| **745** | **(2S,3R,4S,5S,6R)-2-[4-[(3S,3aR,6S,6aR)-6-[3,5-dimethoxy-4-[(2S,3R,4S,5S,6R)-3,4,5-trihydroxy-6-(hydroxymethyl)oxan-2-yl]oxyphenyl]-1,3,3a,4,6,6a-hexahydrofuro[3,4-c]furan-3-yl]-2,6-dimethoxyphenoxy]-6-(hydroxymethyl)oxane-3,4,5-triol** | **POS** | **5.49023E-05** |
| **746** | **Quebrachitol** | **POS** | **0.000345969** |
| **747** | **pedilstatin** | **POS** | **0.027367688** |
| **755** | **5,7-dihydroxy-3-[(2S,3R,4S,5R,6R)-3,4,5-trihydroxy-6-(hydroxymethyl)oxan-2-yl]oxy-2-(3,4,5-trihydroxyphenyl)chromen-4-one** | **POS** | **0.008132873** |
| **756** | **beta-D-Glucopyranoside,_phenylmethyl_6-O-[(2R,3R,4R)-tetrahydro-3,4-dihydroxy-4-(hydroxymethyl)-2-furanyl]-_** | **POS** | **0.04407867** |
| **758** | **(2E,4E)-N-(2-methylpropyl)dodeca-2,4-dienamide** | **POS** | **0.041885849** |
| **759** | **1-(3,4-dihydroxyphenyl)-6,7-dihydroxy-1,2-dihydronaphthalene-2,3-dicarboxylic acid** | **NEG** | **0.003903585** |
| **760** | **Propanoic acid, 2-methyl-, (2R,3R,3aS,4R,6S,7R,10E,12R,13aR)-2,3,4,6,13a-pentakis(acetyloxy)-2,3,3a,4,5,6,7,8,9,12,13,13a-dodecahydro-2,9,9,12-tetramethyl-5-methylene-8,13-dioxo-1H-cyclopentacyclododecen-7-yl ester** | **POS** | **0.001121841** |
| **769** | **(4aS)-6,7-dihydroxy-1,1,4a-trimethyl-3,4,10,10a-tetrahydro-2H-phenanthren-9-one** | **POS** | **0.049457105** |
| **782** | **Pterolactam** | **POS** | **4.92951E-05** |
| **786** | **Terpenoid_EA-I** | **POS** | **0.014351314** |
| **787** | **3-(Methylsulfinyl)propylglucosinolate** | **NEG** | **9.74875E-06** |
| **790** | **Gardoside methyl ester** | **NEG** | **0.016461046** |
| **797** | **7-[(2,6-dihydroxy-2,5,5,8a-tetramethyl-3,4,4a,6,7,8-hexahydro-1H-naphthalen-1-yl)methoxy]chromen-2-one** | **POS** | **0.003367775** |
| **804** | **IRIGENIN** | **NEG** | **0.000937309** |
| **805** | **Hieracin** | **POS** | **0.000115186** |
| **807** | **3-(5-hydroxy-2,2,7,8-tetramethyl-6-oxo-7,8-dihydropyrano[3,2-g]chromen-10-yl)hexanoic acid** | **POS** | **0.043251448** |
| **809** | **4-[5-(4-hydroxy-3-methoxyphenyl)-3,4-dimethyloxolan-2-yl]-2-methoxyphenol** | **POS** | **0.001450783** |
| **810** | **Kaempferol 3-alpha-L-arabinopyranoside** | **NEG** | **0.000358974** |
| **812** | **Vinetorin** | **NEG** | **0.031260311** |
| **813** | **3-[(2E)-3,7-dimethylocta-2,6-dienyl]-2,4-dihydroxy-6-[(E)-2-phenylethenyl]benzoic_acid** | **POS** | **0.031608339** |
| **815** | **gamma-mangostin** | **POS** | **0.004418749** |
| **820** | **Methyl 3,4,5-trimethoxycinnamate** | **NEG** | **0.018807029** |
| **821** | **Corynanthin** | **POS** | **0.001033473** |
| **822** | **Hecogenin** | **POS** | **0.003637981** |
| **826** | **3-methoxy-4-(3-methylbut-2-enyl)-5-[(E)-2-phenylethenyl]phenol** | **POS** | **0.001413157** |
| **829** | **Indigo Carmine** | **POS** | **0.042200745** |
| **830** | **zapotin** | **NEG** | **8.59276E-05** |
| **832** | **asperuloside** | **NEG** | **0.00058007** |
| **833** | **(E)-3-[4-[(2S,3R,4S,5S,6R)-3,4,5-trihydroxy-6-(hydroxymethyl)oxan-2-yl]oxyphenyl]prop-2-enoic acid** | **POS** | **0.013216258** |
| **834** | **eudesmin** | **NEG** | **0.02759631** |
| **838** | **Pachyrrhizin** | **POS** | **0.000640266** |
| **839** | **Djenkolic Acid** | **POS** | **0.046808199** |
| **842** | **Pristimerin** | **POS** | **0.02495539** |
| **844** | **3-[(E)-2-(3-hydroxyphenyl)ethenyl]-5-methoxyphenol** | **POS** | **0.000539575** |
| **847** | **Helenine** | **POS** | **0.02358404** |
| **849** | **Ancistrocladine** | **POS** | **0.00310489** |
| **850** | **Alpha-colubrine** | **POS** | **0.001862938** |
| **853** | **2-decene-4,6,8-triyn-1-al** | **POS** | **0.000539356** |
| **858** | **GAMBOGIC ACID** | **POS** | **0.019163963** |
| **859** | **(2R,3S,4S,5R,6S)-2-(hydroxymethyl)-6-[4-[(E)-3-hydroxyprop-1-enyl]phenoxy]oxane-3,4,5-triol** | **NEG** | **0.000438289** |
| **861** | **3-Methylindole** | **POS** | **0.004719514** |
| **862** | **Sorbic_acid** | **POS** | **0.00019184** |
| **868** | **(2S,3R,4S,5R)-2-[(2R,3R,4S,5S,6R)-4,5-dihydroxy-6-(hydroxymethyl)-2-(2-phenylethoxy)oxan-3-yl]oxyoxane-3,4,5-triol** | **POS** | **0.01871307** |
| **870** | **STEPHENANTHRINE** | **POS** | **0.000940315** |
| **871** | **Bracteatin** | **POS** | **0.000402741** |
| **872** | **falcarindiol** | **POS** | **0.000291307** |
| **873** | **1,7-bis(4-hydroxyphenyl)heptan-3-one** | **POS** | **0.001176577** |
| **878** | **5-Oxopentanoate** | **NEG** | **0.019764732** |
| **886** | **Caffeine** | **NEG** | **0.000868832** |
| **888** | **Methyl cinnamate** | **NEG** | **0.037540435** |
| **890** | **gamma-Glutamyl-beta-cyanoalanine** | **NEG** | **0.034271146** |
| **891** | **3-Carboxy-1-hydroxypropyl-ThPP** | **NEG** | **0.001822587** |
| **893** | **D-Ribonate** | **POS** | **0.000518692** |
| **897** | **M305T86** | **NEG** | **0.038140312** |
| **899** | **3-Phosphonooxypyruvate** | **NEG** | **0.014337948** |
| **901** | **Stachyose** | **NEG** | **0.002620032** |
| **903** | **Oxaloacetate 4-methyl ester** | **NEG** | **0.007478292** |
| **909** | **sn-Glycero-3-phosphoethanolamine** | **NEG** | **0.013162536** |
| **910** | **Ethylene glycol** | **POS** | **8.02866E-05** |
| **912** | **3-Indoleacrylate** | **POS** | **0.000928297** |
| **914** | **6-Deoxy-5-ketofructose 1-phosphate** | **NEG** | **0.000373132** |
| **915** | **Nopaline** | **NEG** | **0.013526495** |
| **916** | **4-Hydroxy-2-oxopentanoate** | **POS** | **7.51725E-05** |
| **918** | **D-Sorbitol** | **POS** | **0.003854096** |
| **919** | **D-Galactono-1,4-lactone** | **NEG** | **0.006145603** |
| **926** | **trans-Cinnamate** | **NEG** | **0.00939847** |
| **934** |  | **NEG** | **0.004240289** |
| **945** |  | **NEG** | **0.025405777** |
| **951** |  | **NEG** | **0.024305589** |
| **955** |  | **NEG** | **0.006921494** |
| **966** |  | **NEG** | **0.009685104** |
| **967** |  | **NEG** | **0.006158819** |
| **977** |  | **NEG** | **0.003903924** |
| **982** |  | **NEG** | **0.005917868** |
| **988** |  | **NEG** | **0.034524082** |
| **991** |  | **NEG** | **0.008736683** |
| **1014** |  | **NEG** | **0.005357161** |
| **1024** | **Bronopol** | **NEG** | **0.028779923** |
| **1032** |  | **NEG** | **0.000894403** |
| **1033** | **Hexafluoroacetylacetone** | **NEG** | **0.010982962** |
| **1034** |  | **NEG** | **0.030136798** |
| **1042** |  | **NEG** | **0.00986532** |
| **1045** | **2,5-Dichloro-4-oxohex-2-enedioate** | **NEG** | **0.008653659** |
| **1049** |  | **NEG** | **0.0070582** |
| **1053** |  | **NEG** | **0.008021348** |
| **1060** |  | **NEG** | **0.027567445** |
| **1065** |  | **NEG** | **0.040851597** |
| **1067** |  | **NEG** | **0.006094087** |
| **1072** |  | **NEG** | **0.001455927** |
| **1074** |  | **NEG** | **0.010125853** |
| **1075** |  | **NEG** | **0.006125513** |
| **1079** |  | **NEG** | **0.038602677** |
| **1080** |  | **NEG** | **0.009883874** |
| **1081** |  | **NEG** | **0.007275108** |
| **1082** |  | **NEG** | **0.039977131** |
| **1083** |  | **NEG** | **0.00167716** |
| **1086** |  | **NEG** | **0.002005792** |
| **1087** |  | **NEG** | **0.005861091** |
| **1088** |  | **NEG** | **0.003485507** |
| **1095** |  | **NEG** | **0.008283534** |
| **1097** |  | **NEG** | **0.001938818** |
| **1099** |  | **NEG** | **0.00788014** |
| **1105** |  | **NEG** | **0.005812748** |
| **1106** |  | **NEG** | **0.026360456** |
| **1107** |  | **NEG** | **0.000732005** |
| **1112** |  | **NEG** | **0.041764825** |
| **1113** |  | **NEG** | **0.045433531** |
| **1114** | **Tetrachlorvinphos** | **NEG** | **0.005413489** |
| **1116** |  | **NEG** | **0.002344159** |
| **1126** | **6-Oxo-2-hydroxy-7-(4'-chlorophenyl)-3,8,8-trichloroocta-2E,4E,7E-trienoate** | **NEG** | **0.044435265** |
| **1130** |  | **NEG** | **0.005249953** |
| **1131** |  | **NEG** | **0.009583056** |
| **1132** |  | **NEG** | **0.009677175** |
| **1133** |  | **NEG** | **0.004298012** |
| **1134** |  | **NEG** | **0.014973177** |
| **1136** |  | **NEG** | **0.015044143** |
| **1140** |  | **NEG** | **0.010537206** |
| **1145** |  | **NEG** | **0.007651002** |
| **1149** |  | **NEG** | **0.021924875** |
| **1151** |  | **NEG** | **0.012572585** |
| **1152** |  | **NEG** | **0.00675399** |
| **1153** |  | **NEG** | **0.036649951** |
| **1154** |  | **NEG** | **0.003110408** |
| **1155** | **8-Chlorodiltiazem** | **NEG** | **0.004962576** |
| **1159** |  | **NEG** | **0.024687132** |
| **1164** | **Pelitinib** | **NEG** | **0.023837121** |
| **1165** |  | **NEG** | **0.041713513** |
| **1168** |  | **NEG** | **0.025979042** |
| **1169** |  | **NEG** | **0.002749926** |
| **1171** | **p-Hydroxynefazodone** | **NEG** | **0.004728328** |
| **1172** |  | **NEG** | **0.008247882** |
| **1178** |  | **NEG** | **0.037501032** |
| **1181** |  | **NEG** | **0.008523789** |
| **1182** |  | **NEG** | **0.013707937** |
| **1183** |  | **NEG** | **0.023550312** |
| **1187** |  | **NEG** | **0.005938085** |
| **1188** |  | **NEG** | **0.042501816** |
| **1190** | **Perfluorooctyl iodide** | **NEG** | **0.000657429** |
| **1196** |  | **NEG** | **0.008059854** |
| **1197** |  | **NEG** | **0.003391729** |
| **1205** |  | **NEG** | **0.024343494** |
| **1208** | **Cer(d18:1/22:6(5Z,7Z,10Z,13Z,16Z,19Z)-OH(4))** | **NEG** | **0.015253829** |
| **1212** |  | **NEG** | **0.028544684** |
| **1214** | **Spirolide D** | **NEG** | **0.009735164** |
| **1218** | **Tubulysin E** | **NEG** | **0.014672013** |
| **1220** |  | **NEG** | **0.024908532** |
| **1228** | **1-(2,2-Dichloroethyl)-1-nitrosourea** | **POS** | **0.003470675** |
| **1229** | **Tetrachloro-m-xylene** | **POS** | **0.001489437** |
| **1231** |  | **POS** | **0.00177208** |
| **1232** |  | **POS** | **0.007708827** |
| **1233** |  | **POS** | **0.009322884** |
| **1234** |  | **POS** | **0.037298029** |
| **1235** |  | **POS** | **0.01990909** |
| **1240** |  | **POS** | **0.041066301** |
| **1241** |  | **POS** | **0.00440806** |
| **1258** |  | **NEG** | **0.018372504** |
| **1266** |  | **NEG** | **0.039101047** |
| **1273** |  | **POS** | **0.039415484** |
| **1274** | **Nornitrogen mustard** | **NEG** | **0.018329568** |
| **1278** | **2-Bromoacetaldehyde** | **NEG** | **0.006839991** |
| **1280** |  | **NEG** | **0.00814859** |
| **1281** |  | **NEG** | **0.003001849** |
| **1287** |  | **NEG** | **0.011160224** |
| **1291** |  | **NEG** | **0.031697243** |
| **1302** |  | **NEG** | **0.006053859** |
| **1313** |  | **NEG** | **0.001950383** |
| **1322** |  | **NEG** | **0.003213322** |
| **1327** |  | **NEG** | **0.033793966** |
| **1340** |  | **NEG** | **0.038928977** |
| **1342** |  | **NEG** | **0.016280433** |
| **1352** |  | **POS** | **0.002821086** |
| **1353** |  | **POS** | **0.001325737** |
| **1359** |  | **POS** | **0.03264893** |
| **1360** |  | **POS** | **0.006337612** |
| **1367** |  | **POS** | **0.0191039** |
| **1368** |  | **POS** | **0.044823688** |
| **1386** |  | **POS** | **0.003819438** |
| **1387** |  | **POS** | **0.011996797** |
| **1407** |  | **NEG** | **0.02803467** |
| **1419** |  | **NEG** | **0.029855662** |
| **1438** | **Emblicanin A** | **NEG** | **0.04132827** |
| **1440** |  | **NEG** | **4.41305E-06** |
| **1441** |  | **NEG** | **7.17822E-07** |
| **1455** |  | **NEG** | **0.014600384** |
| **1471** |  | **NEG** | **0.001699556** |
| **1476** |  | **NEG** | **0.010414382** |
| **1483** |  | **NEG** | **0.001091933** |
| **1496** |  | **NEG** | **0.011271712** |
| **1510** | **2,2-Bis(4-hydroxyphenyl)hexafluoropropane** | **NEG** | **0.039173902** |
| **1511** | **Bortezomib** | **NEG** | **0.010824562** |
| **1512** |  | **NEG** | **0.00129872** |
| **1514** |  | **NEG** | **0.000738055** |
| **1526** |  | **NEG** | **0.023978228** |
| **1527** |  | **NEG** | **0.010828847** |
| **1532** |  | **NEG** | **0.000660956** |
| **1537** |  | **NEG** | **0.001446392** |
| **1555** |  | **NEG** | **0.033109256** |
| **1559** | **Calcium hydroxide** | **POS** | **0.00378014** |
| **1562** | **3-Methylbutamine** | **POS** | **0.008993866** |
| **1564** |  | **POS** | **0.000227989** |
| **1565** | **2-Hydroxyisobutyrate** | **POS** | **0.000347238** |
| **1572** |  | **NEG** | **0.002797804** |
| **1587** |  | **NEG** | **0.002963541** |
| **1610** |  | **NEG** | **0.032769027** |
| **1611** | **dTDP-6-deoxy-beta-L-talose** | **NEG** | **0.007862583** |
| **1616** | **Pedunculagin** | **NEG** | **0.042680297** |
| **1617** | **FAD** | **NEG** | **0.02558822** |
| **1623** |  | **NEG** | **0.028200363** |
| **1626** |  | **NEG** | **0.010328049** |
| **1634** |  | **POS** | **0.009616215** |
| **1641** | **4-Hydroxybutanoic acid** | **POS** | **0.003359756** |
| **1642** | **1-phthaleneacetic acid sodium salt** | **POS** | **0.030652071** |
| **1643** | **5-Hydroxyferulic acid methyl ester** | **POS** | **0.004284513** |
| **1646** |  | **NEG** | **0.003231912** |
| **1651** |  | **NEG** | **0.0169587** |
| **1661** |  | **POS** | **0.000731504** |
| **1667** |  | **NEG** | **8.75662E-06** |
| **1673** |  | **NEG** | **0.022396109** |
| **1681** |  | **NEG** | **0.015529679** |
| **1696** | **7-Methylinosine** | **NEG** | **0.013124853** |
| **1702** |  | **NEG** | **0.00088114** |
| **1703** |  | **NEG** | **4.1245E-06** |
| **1706** |  | **NEG** | **0.025015031** |
| **1710** | **Oxalyl-CoA** | **NEG** | **0.039863782** |
| **1712** |  | **NEG** | **0.034237612** |
| **1730** |  | **NEG** | **0.010440391** |
| **1731** | **Diflunisal** | **NEG** | **0.008125069** |
| **1735** |  | **NEG** | **0.008758916** |
| **1736** |  | **NEG** | **0.004433172** |
| **1742** | **Vedroprevir** | **NEG** | **0.030125443** |
| **1743** |  | **NEG** | **0.037250191** |
| **1744** |  | **POS** | **0.021518339** |
| **1745** |  | **POS** | **0.003521259** |
| **1750** | **Creatinine** | **POS** | **0.034426983** |
| **1751** |  | **POS** | **0.002787646** |
| **1752** | **5-Aminolevulite** | **POS** | **0.004218254** |
| **1753** |  | **POS** | **0.008231927** |
| **1754** |  | **POS** | **0.003020619** |
| **1756** | **Quinoline yellow WS** | **POS** | **9.72517E-05** |
| **1757** | **Adenosine thiamine triphosphate** | **POS** | **0.02970323** |
| **1768** | **Phenothrin** | **NEG** | **0.018930555** |
| **1769** | **ID14326** | **NEG** | **0.028937927** |
| **1777** | **Perfluoro(methylcyclohexane)** | **NEG** | **0.023286545** |
| **1783** |  | **NEG** | **0.035978151** |
| **1790** |  | **NEG** | **0.028183927** |
| **1796** |  | **NEG** | **1.73802E-06** |
| **1802** |  | **POS** | **0.039326624** |
| **1809** |  | **NEG** | **0.016076062** |
| **1818** | **Acetyl citrate** | **NEG** | **0.00773874** |
| **1825** |  | **NEG** | **0.047646541** |
| **1829** |  | **POS** | **0.017609044** |
| **1830** |  | **POS** | **0.016562272** |
| **1831** |  | **POS** | **0.031057579** |
| **1833** |  | **NEG** | **0.027678391** |
| **1846** |  | **NEG** | **0.048743207** |
| **1852** |  | **NEG** | **0.017627968** |
| **1855** |  | **NEG** | **0.004897201** |
| **1861** |  | **NEG** | **0.027036566** |
| **1868** | **5-Acetylamino-6-formylamino-3-methyluracil** | **NEG** | **0.013646902** |
| **1869** |  | **NEG** | **0.048399556** |
| **1872** |  | **NEG** | **0.006674501** |
| **1887** |  | **NEG** | **0.034332305** |
| **1890** | **(3E)-4-(2-Carboxyphenyl)-2-oxobut-3-enoate** | **NEG** | **0.025874585** |
| **1893** |  | **NEG** | **0.003406155** |
| **1898** |  | **NEG** | **0.028778546** |
| **1900** | **TG(14:0/22:0/24:0)** | **POS** | **0.042879533** |
| **1901** | **TG(15:0/22:0/24:0)** | **POS** | **0.000535468** |
| **1905** |  | **POS** | **0.011378512** |
| **1908** |  | **NEG** | **0.013323768** |
| **1909** |  | **NEG** | **0.003734672** |
| **1912** |  | **NEG** | **0.014690122** |
| **1925** | **Fluoroacetyl-CoA** | **POS** | **0.016979551** |
| **1932** |  | **NEG** | **0.019549986** |
| **1941** |  | **POS** | **0.016385051** |
| **1944** |  | **POS** | **0.042465354** |
| **1946** |  | **NEG** | **0.005061635** |
| **1947** |  | **NEG** | **0.002401105** |
| **1948** |  | **POS** | **0.009684663** |
| **1954** | **Pexidartinib** | **NEG** | **0.049241273** |
| **1955** | **Teasterone** | **NEG** | **0.018819597** |
| **1956** |  | **NEG** | **5.42792E-05** |
| **1957** |  | **NEG** | **0.000240982** |
| **1958** | **(5Z,14Z,17Z)-Henicosa-5,14,17-trienoylcarnitine** | **NEG** | **0.004073481** |
| **1959** | **Lamivudine-triphosphate** | **NEG** | **0.000624672** |
| **1960** |  | **NEG** | **0.002289189** |
| **1961** |  | **NEG** | **0.001344173** |
| **1963** |  | **NEG** | **0.000494568** |
| **1966** | **maropitant** | **NEG** | **0.000591094** |
| **1973** | **Malonyl-CoA** | **POS** | **0.011415325** |
| **1983** | **3-[(2-oxoacetyl)oxy]-4-(trimethylazaniumyl)butanoate-CoA** | **NEG** | **0.016916266** |
| **1984** |  | **NEG** | **0.02232833** |
| **1985** |  | **NEG** | **3.57481E-05** |
| **1986** |  | **NEG** | **0.018986771** |
| **1995** |  | **NEG** | **0.007801825** |
| **1996** | **Etobenzanid** | **NEG** | **0.018713245** |
| **1999** |  | **NEG** | **0.03651922** |
| **2000** | **CITCO** | **NEG** | **0.025640917** |
| **2001** |  | **NEG** | **2.07937E-05** |
| **2002** |  | **NEG** | **0.01228965** |
| **2007** |  | **NEG** | **0.002460585** |
| **2011** |  | **NEG** | **0.001999719** |
| **2019** |  | **NEG** | **0.004183458** |
| **2020** |  | **POS** | **0.027793979** |
| **2026** |  | **POS** | **0.033730935** |
| **2027** |  | **POS** | **0.043327583** |
| **2029** | **Citrate** | **NEG** | **0.006174569** |
| **2034** |  | **NEG** | **0.008052504** |
| **2037** |  | **NEG** | **0.00175746** |
| **2041** |  | **NEG** | **0.005931797** |
| **2045** |  | **NEG** | **0.000305898** |
| **2050** |  | **POS** | **0.023685316** |
| **2051** |  | **NEG** | **0.00673639** |
| **2054** |  | **NEG** | **0.003596911** |
| **2057** |  | **POS** | **0.038305426** |
| **2058** |  | **NEG** | **0.005565304** |
| **2065** |  | **NEG** | **0.002129808** |
| **2066** |  | **NEG** | **0.043303647** |
| **2081** |  | **NEG** | **0.002075908** |
| **2083** |  | **POS** | **0.000525287** |
| **2084** | **UDP-N-acetylmuramoyl-L-alanyl-D-glutamate** | **POS** | **0.019423913** |
| **2101** |  | **NEG** | **0.001751283** |
| **2104** |  | **NEG** | **0.000475199** |
| **2105** | **1-Aminocyclopropane-1-carboxylate** | **POS** | **0.026425723** |
| **2118** |  | **NEG** | **0.03508253** |
| **2121** |  | **NEG** | **0.041564917** |
| **2122** |  | **NEG** | **7.35417E-07** |
| **2124** |  | **NEG** | **0.00121524** |
| **2128** |  | **NEG** | **0.000598799** |
| **2134** |  | **NEG** | **3.68953E-05** |
| **2135** | **Cefuroxime sodium** | **NEG** | **0.02131092** |
| **2160** | **Meclofemate sodium** | **NEG** | **0.049235887** |
| **2161** |  | **NEG** | **0.000115117** |
| **2173** |  | **POS** | **0.003517206** |
| **2183** |  | **NEG** | **0.042930281** |
| **2196** |  | **POS** | **0.016263052** |
| **2198** |  | **NEG** | **0.012658186** |
| **2200** |  | **NEG** | **0.025787662** |
| **2210** |  | **NEG** | **0.026516152** |
| **2211** |  | **NEG** | **0.000275338** |
| **2218** |  | **POS** | **0.016633028** |
| **2233** |  | **NEG** | **0.042382415** |
| **2238** |  | **NEG** | **0.001126498** |
| **2253** |  | **NEG** | **0.036058147** |
| **2259** |  | **NEG** | **0.001204011** |
| **2278** | **9-(2-Aminopurin-9-yl)purin-2-amine** | **POS** | **0.02337051** |
| **2280** |  | **NEG** | **0.019758379** |
| **2283** |  | **NEG** | **0.021026091** |
| **2285** |  | **NEG** | **0.01898205** |
| **2297** |  | **NEG** | **0.000401704** |
| **2318** |  | **POS** | **0.000424196** |
| **2329** |  | **NEG** | **0.036587771** |
| **2331** |  | **NEG** | **0.012346802** |
| **2335** | **Phenthrene-4,5-dicarboxylate** | **POS** | **0.041275847** |
| **2348** |  | **NEG** | **0.011150191** |
| **2353** |  | **POS** | **0.047954747** |
| **2354** | **Nebularine** | **POS** | **0.000735462** |
| **2356** | **(2-Carbamoyl-7-oxo-1,6-diazabicyclo[3.2.1]octan-6-yl) hydrogen sulfate** | **POS** | **0.010243115** |
| **2357** | **3'-Azido-3'-deoxythymidine, 98%** | **POS** | **0.035973605** |
| **2359** | **N-Acetylmuramate** | **POS** | **0.014551647** |
| **2369** | **2-Amino-4-hydroxy-6-(D-erythro-1,2,3-trihydroxypropyl)-7,8-dihydropteridine** | **POS** | **0.035268426** |
| **2370** | **N-[4'-hydroxy-(E)-cinnamoyl]-L-aspartic acid** | **POS** | **0.024161908** |
| **2372** |  | **NEG** | **0.003373584** |
| **2377** |  | **NEG** | **0.002080088** |
| **2397** |  | **NEG** | **0.012661546** |
| **2405** | **1,3-Difluoroacetone** | **NEG** | **0.031311535** |
| **2412** |  | **NEG** | **0.002797155** |
| **2415** |  | **NEG** | **0.044595967** |
| **2417** |  | **NEG** | **0.003148416** |
| **2418** |  | **NEG** | **0.0072963** |
| **2420** | **SQ 26180** | **POS** | **0.040505138** |
| **2432** |  | **NEG** | **0.011509979** |
| **2434** | **Dianthalexin** | **POS** | **3.43341E-06** |
| **2437** | **Streptidine 6-phosphate** | **POS** | **0.03738789** |
| **2438** |  | **POS** | **0.014642572** |
| **2449** |  | **NEG** | **0.045254257** |
| **2455** | **3-hydroxypropanoyl-CoA** | **NEG** | **0.048699087** |
| **2457** |  | **NEG** | **0.028864031** |
| **2460** |  | **NEG** | **0.002166429** |
| **2463** |  | **NEG** | **2.13389E-05** |
| **2481** | **Xanthopterin-B2** | **POS** | **0.003076469** |
| **2482** |  | **NEG** | **0.026189603** |
| **2484** |  | **NEG** | **0.000901319** |
| **2503** |  | **NEG** | **0.046338828** |
| **2526** |  | **POS** | **0.047132338** |
| **2531** |  | **POS** | **0.032017673** |
| **2542** |  | **NEG** | **0.040491679** |
| **2543** |  | **NEG** | **0.021518057** |
| **2556** |  | **NEG** | **0.002648312** |
| **2559** |  | **NEG** | **0.001692993** |
| **2564** |  | **NEG** | **0.003720434** |
| **2566** | **Tetrabromophenol blue** | **NEG** | **0.016640588** |
| **2576** |  | **NEG** | **0.040706594** |
| **2577** | **TG(15:0/22:1(13Z)/O-18:0)** | **NEG** | **0.03021852** |
| **2578** | **5-Hydroxyferulic acid methyl ester** | **POS** | **0.010021689** |
| **2579** |  | **POS** | **0.0060043** |
| **2580** | **Quinoline yellow WS** | **POS** | **0.044555715** |
| **2596** | **Tripalmitoyl-s-glycerylcysteine** | **NEG** | **0.048621447** |
| **2600** |  | **POS** | **0.033783669** |
| **2604** |  | **NEG** | **0.001150552** |
| **2606** |  | **NEG** | **0.01209106** |
| **2610** |  | **NEG** | **0.020835956** |
| **2614** |  | **NEG** | **0.004753792** |
| **2625** |  | **NEG** | **0.018233248** |
| **2626** |  | **NEG** | **0.015802761** |
| **2632** | **Calcium hydroxide** | **POS** | **0.005206627** |
| **2635** | **Heptacarboxyporphyrin** | **NEG** | **0.029163738** |
| **2636** |  | **NEG** | **0.031749894** |
| **2638** |  | **NEG** | **0.002600661** |
| **2641** |  | **NEG** | **0.008263639** |
| **2644** |  | **NEG** | **0.012853175** |
| **2645** |  | **NEG** | **0.014405159** |
| **2662** |  | **NEG** | **0.045514166** |
| **2663** |  | **NEG** | **0.013334369** |
| **2678** |  | **POS** | **0.033289666** |
| **2679** |  | **POS** | **0.046815961** |
| **2681** |  | **POS** | **0.004358751** |
| **2687** |  | **POS** | **0.024359042** |
| **2700** |  | **NEG** | **0.008606116** |
| **2702** |  | **NEG** | **0.028826422** |
| **2712** |  | **NEG** | **0.005061321** |
| **2738** |  | **POS** | **0.036865328** |
| **2758** |  | **NEG** | **0.000630359** |
| **2765** |  | **NEG** | **0.004751058** |
| **2780** |  | **POS** | **0.044430404** |
| **2804** |  | **NEG** | **0.020531744** |
| **2834** |  | **NEG** | **0.000704984** |
| **2837** |  | **NEG** | **0.001245879** |
| **2839** |  | **NEG** | **0.013046889** |
| **2842** |  | **NEG** | **0.001112765** |
| **2843** | **TG(18:0/20:4(5Z,8Z,11Z,14Z)/20:4(5Z,8Z,11Z,14Z))** | **NEG** | **0.004787629** |
| **2851** |  | **NEG** | **0.003289126** |
| **2914** | **TG(14:1(9Z)/16:0/14:1(9Z))** | **NEG** | **0.04900622** |
| **2916** |  | **NEG** | **0.009768204** |
| **2921** |  | **NEG** | **0.000259182** |
| **2922** |  | **POS** | **0.003837021** |
| **2926** |  | **POS** | **0.034918829** |
| **2936** | **Mangiferin 6'-gallate** | **POS** | **0.024010027** |
| **2939** |  | **NEG** | **0.024274563** |
| **2940** | **Sanguisorbic acid dilactone** | **NEG** | **0.028162038** |
| **2941** |  | **NEG** | **0.007106027** |
| **2945** |  | **NEG** | **0.007002945** |
| **2950** |  | **NEG** | **0.006657188** |
| **2953** |  | **NEG** | **0.000825002** |
| **2955** | **2,8-Dihydroxyquinoline-beta-D-glucuronide** | **POS** | **0.03472521** |
| **2979** | **TG(15:0/22:6(4Z,7Z,10Z,13Z,16Z,19Z)/O-18:0)** | **NEG** | **0.003412889** |
| **2980** | **Fraxin** | **POS** | **0.02555752** |
| **2984** |  | **NEG** | **0.027848814** |
| **2990** |  | **NEG** | **0.015140465** |
| **2992** |  | **NEG** | **0.002704778** |
| **2996** |  | **POS** | **0.02096744** |
| **2998** |  | **NEG** | **0.037620674** |
| **2999** |  | **NEG** | **0.000204039** |
| **3005** | **propanoyl-CoA** | **POS** | **0.01280211** |
| **3009** |  | **NEG** | **0.032766179** |
| **3016** |  | **NEG** | **0.029884797** |
| **3037** | **Quercetin 3-O-glucoside** | **POS** | **0.03186445** |
| **3038** | **2-(4-Carboxy-3',6'-dihydroxy-3-oxospiro[2-benzofuran-1,9'-xanthene]-5-yl)-2-methylpropanedioic acid** | **POS** | **0.006103004** |
| **3039** |  | **POS** | **0.025305666** |
| **3042** |  | **NEG** | **0.042419979** |
| **3044** | **Hexafluoroacetone** | **POS** | **0.003351895** |
| **3045** | **Tesevatinib** | **POS** | **0.002524851** |
| **3053** | **Glutamate nitrogen** | **POS** | **7.86358E-05** |
| **3054** | **Quinoline yellow WS** | **POS** | **9.83254E-05** |
| **3055** |  | **POS** | **0.000353171** |
| **3056** |  | **POS** | **6.92538E-05** |
| **3057** |  | **POS** | **0.000274257** |
| **3059** |  | **NEG** | **0.019264457** |
| **3063** |  | **POS** | **0.021653719** |
| **3064** |  | **POS** | **0.01639025** |
| **3065** |  | **POS** | **0.0003015** |
| **3066** |  | **POS** | **0.000215188** |
| **3071** |  | **NEG** | **0.000255909** |
| **3075** |  | **POS** | **0.001768987** |
| **3076** | **Permethrin** | **POS** | **0.000167588** |
| **3082** | **5,6-Dichloro-1,3-cyclohexadiene** | **POS** | **0.002449951** |
| **3083** | **1-phthaleneacetic acid sodium salt** | **POS** | **3.24676E-05** |
| **3089** | **4-(2-Hydroxy-3-(tert-butylamino)propoxy)-3-iodo-1H-indole-2-carbonitrile** | **POS** | **0.03062429** |
| **3090** |  | **POS** | **0.00676503** |
| **3123** | **Chloropropylate** | **NEG** | **0.04300091** |
| **3128** | **TG(14:0/18:0/O-18:0)** | **NEG** | **0.031549112** |
| **3143** | **Benzoic acid, 2-[3,6-bis(acetyloxy)-2,7-dichloro-9H-xanthen-9-yl]-** | **NEG** | **0.009592315** |
| **3166** |  | **NEG** | **0.04991566** |
| **3174** |  | **NEG** | **0.005204485** |
| **3183** |  | **NEG** | **0.012681719** |
| **3190** |  | **NEG** | **8.22157E-05** |
| **3192** |  | **POS** | **0.00331632** |
| **3196** |  | **NEG** | **0.000198033** |
| **3197** |  | **NEG** | **0.005491098** |
| **3215** |  | **NEG** | **0.04642785** |
| **3230** |  | **NEG** | **0.018775743** |
| **3250** |  | **NEG** | **0.049689503** |
| **3257** | **9-(2-Aminopurin-9-yl)purin-2-amine** | **POS** | **0.001579305** |
| **3274** |  | **NEG** | **0.013614344** |
| **3290** |  | **NEG** | **0.025134921** |
| **3292** |  | **POS** | **0.000310752** |
| **3302** |  | **POS** | **0.001080487** |
| **3345** |  | **NEG** | **0.018184061** |
| **3368** | **Neosurugatoxin** | **POS** | **0.003681454** |
| **3371** |  | **NEG** | **0.034486616** |
| **3376** | **Gallagic acid** | **POS** | **0.043512047** |
| **3379** |  | **POS** | **5.33542E-05** |
| **3380** |  | **POS** | **0.016878529** |
| **3383** |  | **NEG** | **0.001077778** |
| **3393** |  | **NEG** | **0.044153179** |
| **3399** |  | **NEG** | **0.008534231** |
| **3420** |  | **NEG** | **0.031308693** |
| **3428** |  | **NEG** | **0.023202608** |
| **3469** |  | **POS** | **0.0076673** |
| **3477** |  | **NEG** | **0.007138722** |
| **3499** |  | **NEG** | **0.041938551** |
| **3500** |  | **NEG** | **0.004914655** |
| **3534** |  | **POS** | **0.007568371** |
| **3550** |  | **NEG** | **0.026354983** |
| **3570** |  | **NEG** | **0.041248937** |
| **3577** |  | **NEG** | **0.024252709** |
| **3580** |  | **NEG** | **0.047516366** |
| **3590** |  | **NEG** | **0.026298056** |
| **3607** |  | **NEG** | **0.036238432** |
| **3610** | **5-(3',4',5'-Trihydroxyphenyl)-gamma-valerolactone-3'-O-sulphate** | **NEG** | **0.010386182** |
| **3611** | **UDP** | **NEG** | **0.04753352** |
| **3612** |  | **NEG** | **0.040794612** |
| **3613** |  | **NEG** | **0.04236305** |
| **3621** | **Convicine** | **NEG** | **0.030768094** |
| **3622** |  | **NEG** | **0.019327544** |
| **3627** |  | **NEG** | **0.000709569** |
| **3632** |  | **POS** | **0.024298523** |
| **3640** |  | **NEG** | **0.023817094** |
| **3676** |  | **POS** | **0.039939195** |
| **3677** | **Magnesium oleate** | **POS** | **0.015084951** |
| **3687** |  | **NEG** | **0.042655375** |
| **3688** | **Magnesium oleate** | **NEG** | **0.003210854** |
| **3693** |  | **POS** | **0.000400577** |
| **3710** |  | **POS** | **0.005864404** |
| **3716** |  | **NEG** | **0.012184835** |
| **3719** | **Diclosulam** | **NEG** | **0.001832998** |
| **3725** |  | **NEG** | **0.015558141** |
| **3726** |  | **NEG** | **0.014256406** |
| **3727** |  | **NEG** | **0.013318457** |
| **3748** | **Diclobutrazol** | **NEG** | **0.019422937** |
| **3753** |  | **NEG** | **0.012015305** |
| **3787** |  | **NEG** | **0.001869413** |
| **3791** | **4-[2-(4-Iodophenyl)-3-(4-nitrophenyl)-1H-tetrazol-5-yl]benzene-1,3-disulfonic Acid** | **POS** | **0.000446542** |
| **3806** |  | **POS** | **0.013438742** |
| **3807** |  | **POS** | **0.030345725** |
| **3808** |  | **POS** | **0.023265363** |
| **3817** |  | **NEG** | **0.000242538** |
| **3841** |  | **NEG** | **0.022252781** |
| **3843** |  | **NEG** | **0.035283658** |
| **3844** |  | **NEG** | **0.014516611** |
| **3845** |  | **NEG** | **0.011935634** |
| **3847** |  | **POS** | **0.024369064** |
| **3850** |  | **POS** | **0.001753646** |
| **3851** |  | **POS** | **0.002041781** |
| **3852** |  | **POS** | **0.000907768** |
| **3854** | **Hydroxysenkirkine** | **POS** | **0.013106951** |
| **3879** |  | **POS** | **0.000811171** |
| **3886** | **Tesevatinib** | **POS** | **0.002040979** |
| **3932** | **Diclobutrazol** | **POS** | **0.016882691** |
| **3934** | **Rabeprazole sodium** | **POS** | **0.000535839** |
| **3937** | **2,8-Quinolinediol 2-sulfate** | **POS** | **0.001228486** |
| **3938** | **NS 1619** | **POS** | **0.002505752** |
| **3949** |  | **NEG** | **0.003034104** |
| **3950** |  | **NEG** | **0.048760216** |
| **3951** | **Atoxin a(s)** | **NEG** | **0.034114244** |
| **3952** | **Neopterin** | **NEG** | **0.03262421** |
| **3953** | **Butanoic acid, [(diethoxyphosphinyl)oxy]methyl ester** | **NEG** | **0.031756373** |
| **3955** |  | **NEG** | **0.003236086** |
| **3962** |  | **POS** | **0.000462278** |
| **3963** | **1-phthaleneacetic acid sodium salt** | **POS** | **0.001992539** |
| **3968** | **Flumazenil** | **POS** | **6.01774E-05** |
| **3970** |  | **POS** | **0.04073426** |
| **3983** |  | **NEG** | **0.003013925** |
| **3984** |  | **NEG** | **0.002540226** |
| **3985** |  | **NEG** | **0.010683816** |
| **3989** |  | **NEG** | **0.036271073** |
| **3995** |  | **NEG** | **0.00349158** |
| **3998** |  | **POS** | **0.020216486** |
| **3999** |  | **NEG** | **0.00172283** |
| **4007** |  | **NEG** | **0.017043059** |
| **4032** |  | **NEG** | **0.046464626** |
| **4041** | **Methylgallic acid-O-sulphate** | **NEG** | **0.004485773** |
| **4045** |  | **NEG** | **0.004307331** |
| **4046** | **Benzoylprop-ethyl** | **NEG** | **0.000470986** |
| **4047** |  | **NEG** | **0.000165559** |
| **4048** |  | **NEG** | **0.011689368** |
| **4049** |  | **NEG** | **0.011418614** |
| **4061** |  | **NEG** | **0.023113614** |
| **4071** | **4-hydroxytriazolam** | **NEG** | **0.035033854** |
| **4073** |  | **NEG** | **0.000467088** |
| **4078** |  | **POS** | **0.019704311** |
| **4081** | **Vicianose** | **POS** | **0.005560418** |
| **4083** |  | **POS** | **0.033438142** |
| **4095** | **Procymidone** | **NEG** | **0.049440563** |
| **4110** | **Fosphenytoin** | **NEG** | **0.00834021** |
| **4117** |  | **NEG** | **0.002275193** |
| **4121** |  | **NEG** | **0.013057388** |
| **4149** | **Farnesyl triphosphate** | **NEG** | **0.012364522** |
| **4150** |  | **NEG** | **0.003551297** |
| **4172** | **TG(14:1(9Z)/18:3(6Z,9Z,12Z)/14:1(9Z))** | **NEG** | **0.027465735** |
| **4179** |  | **POS** | **0.002472465** |
| **4194** |  | **POS** | **0.047744946** |
| **4217** |  | **NEG** | **0.017303468** |
| **4230** |  | **POS** | **0.02026455** |
| **4232** |  | **POS** | **0.036421423** |
| **4233** |  | **POS** | **0.038140983** |
| **4238** |  | **NEG** | **0.046673503** |
| **4240** |  | **POS** | **0.040286762** |
| **4281** |  | **POS** | **0.011331944** |
| **4283** |  | **NEG** | **0.046515279** |
| **4289** |  | **NEG** | **0.031032092** |
| **4307** |  | **NEG** | **0.001851231** |
| **4320** |  | **NEG** | **0.016009738** |
| **4321** | **Saccharin sodium** | **POS** | **0.00462413** |
| **4333** |  | **POS** | **0.000374838** |
| **4339** |  | **NEG** | **0.001888203** |
| **4349** | **3-{[(2E)-4-Amino-4-oxobut-2-enoyl]amino}-L-alanine** | **NEG** | **0.009247728** |
| **4350** | **4-Sulfobenzoate** | **NEG** | **0.03598865** |
| **4353** |  | **NEG** | **0.000115954** |
| **4354** | **O-Carbamoyladenylate** | **NEG** | **0.005441209** |
| **4366** | **GDP-D-glycero-alpha-D-manno-heptose** | **NEG** | **0.030606783** |
| **4391** |  | **POS** | **0.002233794** |
| **4398** |  | **POS** | **0.012863715** |
| **4399** |  | **NEG** | **0.022154023** |
| **4401** |  | **NEG** | **0.016688837** |
| **4402** |  | **NEG** | **0.009140615** |
| **4404** |  | **NEG** | **0.003601318** |
| **4418** | **3,5-Di-O-galloyl-1,4-galactarolactone** | **POS** | **0.015814954** |
| **4445** |  | **NEG** | **0.003137468** |
| **4446** |  | **NEG** | **0.003409908** |
| **4448** |  | **NEG** | **0.029029168** |
| **4449** |  | **NEG** | **0.023875913** |
| **4451** | **(9E)-10-nitrooctadec-9-enoyl-CoA** | **POS** | **0.0019145** |
| **4454** | **Amidinophenylpyruvic acid** | **NEG** | **0.042609947** |
| **4455** | **3,5-dihydroxy-4-(sulfooxy)benzoic acid** | **NEG** | **0.003536169** |
| **4456** | **Diflunisal** | **NEG** | **0.003083925** |
| **4458** | **N-Pyruvoyl-5-methoxy-3-hydroxyanthranilate** | **NEG** | **0.004550263** |
| **4460** | **Eltenac** | **NEG** | **0.003513768** |
| **4461** | **Nedaplatin** | **NEG** | **0.004328047** |
| **4462** |  | **NEG** | **0.002834652** |
| **4466** |  | **NEG** | **0.044243054** |
| **4467** |  | **NEG** | **0.04476237** |
| **4468** |  | **NEG** | **0.045325534** |
| **4469** | **ascorbic acid citrate** | **NEG** | **0.00335193** |
| **4470** | **Nitroquine** | **NEG** | **0.002845824** |
| **4471** |  | **NEG** | **0.020849891** |
| **4474** |  | **NEG** | **0.006265132** |
| **4486** |  | **NEG** | **0.01391666** |
| **4488** |  | **NEG** | **0.012903561** |
| **4491** |  | **NEG** | **0.016063943** |
| **4493** |  | **NEG** | **0.015289275** |
| **4494** | **Cliomide** | **NEG** | **0.020680111** |
| **4506** | **Glycerol 1-(9Z-octadecenoate) 2-hexadecanoate 3-octadecanoate** | **NEG** | **0.002812358** |
| **4509** | **Maytansine** | **NEG** | **0.036133386** |
| **4513** |  | **POS** | **0.036814944** |
| **4519** |  | **NEG** | **0.042567569** |
| **4530** |  | **NEG** | **0.040040161** |
| **4536** | **1,1-Bis(4-hydroxyphenyl)-2-phenyl-2-iodoethene** | **NEG** | **0.004169538** |
| **4542** | **Nitrofenac** | **NEG** | **0.003713473** |
| **4543** |  | **NEG** | **0.005319061** |
| **4544** |  | **NEG** | **0.028125599** |
| **4553** |  | **NEG** | **0.003300265** |
| **4554** |  | **NEG** | **0.004715664** |
| **4555** |  | **NEG** | **0.003968471** |
| **4556** | **SQ 26180** | **POS** | **0.000517271** |
| **4557** | **9-[2-(Phosphanylmethoxy)propyl]purin-6-amine** | **POS** | **0.017994127** |
| **4561** | **(2-Carbamoyl-7-oxo-1,6-diazabicyclo[3.2.1]octan-6-yl) hydrogen sulfate** | **POS** | **0.000609539** |
| **4564** |  | **POS** | **3.78814E-05** |
| **4566** |  | **POS** | **0.034613729** |
| **4567** |  | **POS** | **0.000156732** |
| **4568** |  | **POS** | **0.008283414** |
| **4602** | **C.I. Acid red 33** | **POS** | **0.007608744** |
| **4613** |  | **NEG** | **0.012192639** |
| **4621** |  | **NEG** | **0.031045934** |
| **4622** |  | **NEG** | **0.030368512** |
| **4630** |  | **NEG** | **0.001460687** |
| **4631** | **dTDP-beta-L-rhodinose** | **NEG** | **0.022937837** |
| **4632** |  | **NEG** | **0.002154071** |
| **4636** |  | **NEG** | **0.046952141** |
| **4637** |  | **NEG** | **0.002572246** |
| **4639** |  | **NEG** | **0.025125108** |
| **4640** |  | **NEG** | **0.015583309** |
| **4641** |  | **NEG** | **0.010245444** |
| **4651** |  | **NEG** | **0.020772458** |
| **4652** |  | **NEG** | **0.03181745** |
| **4666** |  | **POS** | **0.013092015** |
| **4667** |  | **POS** | **0.001706574** |
| **4675** |  | **POS** | **0.00360184** |
| **4676** | **Thiamine hydrochloride** | **POS** | **0.003041394** |
| **4691** |  | **NEG** | **0.004632359** |
| **4692** |  | **NEG** | **0.020216793** |
| **4697** |  | **NEG** | **0.006936584** |
| **4698** | **SPIROMUSTINE** | **POS** | **0.005513172** |
| **4699** |  | **POS** | **0.002224667** |
| **4700** |  | **POS** | **0.004006514** |
| **4701** | **dTDP-beta-L-rhodinose** | **POS** | **0.003819703** |
| **4702** |  | **POS** | **0.000700162** |
| **4703** | **Tartrazine** | **POS** | **0.000487882** |
| **4704** |  | **POS** | **0.005498006** |
| **4705** |  | **POS** | **0.007172469** |
| **4706** |  | **POS** | **0.012151818** |
| **4715** |  | **POS** | **0.014994595** |
| **4717** |  | **POS** | **0.009871972** |
| **4718** |  | **NEG** | **0.005435497** |
| **4725** |  | **NEG** | **0.047449207** |
| **4728** |  | **POS** | **0.005637703** |
| **4736** |  | **NEG** | **0.02756223** |
| **4743** |  | **POS** | **0.000363271** |
| **4745** |  | **POS** | **0.044414153** |
| **4753** | **Nifuradene** | **NEG** | **0.010292742** |
| **4754** | **(+)-2-Amino-7-phosphonoheptanoic acid** | **NEG** | **0.00614368** |
| **4767** |  | **NEG** | **0.012998827** |
| **4770** |  | **NEG** | **0.011076727** |
| **4776** |  | **POS** | **0.001584926** |
| **4777** |  | **POS** | **0.004040487** |
| **4783** | **Dichloromethotrexate** | **POS** | **0.007167409** |
| **4784** |  | **POS** | **0.027523246** |
| **4787** |  | **NEG** | **0.003908381** |
| **4789** |  | **NEG** | **0.003986409** |
| **4790** |  | **NEG** | **0.002579316** |
| **4792** |  | **POS** | **0.001045863** |
| **4793** |  | **NEG** | **0.001982414** |
| **4794** |  | **NEG** | **0.005928632** |
| **4797** |  | **NEG** | **0.004715588** |
| **4798** |  | **NEG** | **0.022822666** |
| **4800** |  | **POS** | **0.000573333** |
| **4807** |  | **POS** | **0.037477451** |
| **4808** |  | **POS** | **0.025871778** |
| **4813** |  | **NEG** | **0.000799918** |
| **4837** | **6-(Dibromomethylene)-17beta-hydroxy-androst-4-en-3-one propiote** | **POS** | **0.022097546** |
| **4843** |  | **NEG** | **0.027438046** |
| **4849** |  | **NEG** | **0.032075751** |
| **4865** |  | **NEG** | **0.046219358** |
| **4870** |  | **NEG** | **0.031457301** |
| **4876** |  | **NEG** | **0.031839953** |
| **4891** |  | **NEG** | **0.031200839** |
| **4900** |  | **NEG** | **0.029637356** |
| **4901** | **TG(15:0/24:0/22:4(7Z,10Z,13Z,16Z))** | **NEG** | **0.032730761** |
| **4909** |  | **NEG** | **0.039925756** |
| **4911** |  | **NEG** | **0.046336869** |
| **4918** | **Nitro 2-acetyloxybenzoate** | **POS** | **0.038338152** |
| **4919** | **N-(2-Hydroxyphenyl)acetamide glucuronide** | **POS** | **0.001713722** |
| **4921** |  | **POS** | **0.00082587** |
| **4922** |  | **POS** | **0.000342156** |
| **4923** | **N-(2,6-Difluorophenyl)-2-oxoglycyl-N-((1S)-1-(carboxymethyl)-2-oxo-3-(2,3,5,6-tetrafluorophenoxy)propyl)-L-alaninamide** | **POS** | **0.000662122** |
| **4924** |  | **POS** | **0.000462527** |
| **4925** |  | **POS** | **0.000200672** |
| **4926** |  | **POS** | **0.000410864** |
| **4927** | **Cyanidin 3-(6''-dioxalylglucoside)** | **POS** | **0.000573727** |
| **4929** |  | **POS** | **0.000315885** |
| **4931** | **2-Hydroxy-6-oxo-6-phenylhexa-2,4-dienoate** | **POS** | **0.001416162** |
| **4933** | **Sepiapterin** | **POS** | **0.003156016** |
| **4934** | **Mono-trans-p-coumaroylmesotartaric acid** | **POS** | **0.002183699** |
| **4935** | **(S)-5-[(4-Amino-4-carboxy-1-oxobutyl)amino]-2-nitrobenzoic acid** | **POS** | **0.000320197** |
| **4936** |  | **POS** | **0.001468572** |
| **4937** |  | **POS** | **0.003278738** |
| **4938** |  | **POS** | **0.002472069** |
| **4940** |  | **POS** | **0.001031171** |
| **4941** |  | **POS** | **0.000282877** |
| **4942** |  | **POS** | **0.003399312** |
| **4943** |  | **POS** | **0.001081044** |
| **4944** |  | **POS** | **0.001084045** |
| **4945** | **2-O-[2-O-(alpha-D-Mannopyranosyl)-alpha-D-glucopyranosyl]-3-phospho-D-glycerate** | **POS** | **0.00483098** |
| **4946** |  | **POS** | **0.002178612** |
| **4947** |  | **POS** | **0.000394493** |
| **4948** |  | **POS** | **0.007868542** |
| **4949** |  | **POS** | **0.022213925** |
| **4964** | **CDP-glucose** | **NEG** | **0.046963697** |
| **4970** | **1-(5'-Phosphoribosyl)-5-amino-4-(N-succinocarboxamide)-imidazole** | **NEG** | **0.001472991** |
| **4975** | **Pahutoxin** | **NEG** | **0.040618215** |
| **4978** |  | **NEG** | **0.001025615** |
| **4981** |  | **NEG** | **0.021255218** |
| **4989** |  | **NEG** | **0.048291053** |
| **4993** | **dTDP-4-acetamido-4,6-dideoxy-D-glucose** | **POS** | **0.002060812** |
| **5001** | **2-Galloyl-1,4-galactarolactone methyl ester** | **NEG** | **0.037159102** |
| **5003** |  | **NEG** | **0.021139238** |
| **5012** | **Phosphomethylphosphonic acid adenosyl ester** | **NEG** | **0.049826424** |
| **5023** | **Morphinone** | **POS** | **0.036413807** |
| **5025** | **TG(20:4(5Z,8Z,11Z,14Z)/24:0/20:4(5Z,8Z,11Z,14Z))** | **NEG** | **0.012719872** |
| **5028** |  | **POS** | **0.000286776** |
| **5029** |  | **POS** | **7.12449E-05** |
| **5030** |  | **POS** | **0.002763223** |
| **5031** |  | **POS** | **0.000953647** |
| **5032** |  | **POS** | **0.001572102** |
| **5033** | **3-Sulfocatechol** | **NEG** | **0.017907972** |
| **5035** |  | **POS** | **0.020222577** |
| **5040** | **4-Methylgallic acid 3-glucuronide** | **POS** | **0.002250259** |
| **5041** |  | **POS** | **0.003042676** |
| **5042** |  | **POS** | **0.008318354** |
| **5046** | **Heptacarboxyporphyrin** | **POS** | **0.035187362** |
| **5058** | **dTDP-3-methyl-4-oxo-2,6-dideoxy-L-allose** | **NEG** | **0.015641581** |
| **5062** |  | **NEG** | **0.002804065** |
| **5063** |  | **NEG** | **0.045774736** |
| **5072** | **alpha-D-Galactopyranuronosyl-(1->4)-alpha-D-galactopyranuronosyl-(1->4)-D-galacturonic acid** | **POS** | **0.003615729** |
| **5073** |  | **NEG** | **0.011098896** |
| **5075** |  | **NEG** | **0.005085662** |
| **5079** |  | **NEG** | **0.033592497** |
| **5082** |  | **NEG** | **0.03075662** |
| **5083** |  | **NEG** | **0.015712156** |
| **5087** |  | **NEG** | **0.018995836** |
| **5092** | **Quinoxyfen** | **NEG** | **0.002909526** |
| **5093** |  | **NEG** | **0.007042075** |
| **5106** |  | **POS** | **0.017960735** |
| **5113** |  | **NEG** | **0.016101551** |
| **5115** | **dTDP-D-galacturote** | **NEG** | **0.010574797** |
| **5120** |  | **NEG** | **0.047236465** |
| **5135** |  | **NEG** | **0.001572318** |
| **5148** |  | **NEG** | **0.000439668** |
| **5166** | **NTP** | **POS** | **0.021595437** |
| **5168** |  | **POS** | **0.025697166** |
| **5169** | **dTDP-3-methyl-4-oxo-2,6-dideoxy-L-allose** | **POS** | **0.024187038** |
| **5170** |  | **POS** | **0.009947355** |
| **5171** |  | **POS** | **0.0079643** |
| **5173** |  | **POS** | **0.037425776** |
| **5176** | **Bromodiphenhydramine** | **POS** | **0.014849462** |
| **5177** |  | **POS** | **0.015300114** |
| **5180** | **CDP-glucose** | **POS** | **0.006509298** |
| **5181** |  | **POS** | **0.038630045** |
| **5182** | **Pyridoxamine phosphate** | **NEG** | **0.010096447** |
| **5183** | **beta-Citryl-L-glutamate** | **NEG** | **0.005386063** |
| **5188** |  | **NEG** | **0.008424527** |
| **5189** | **Flavogallol** | **NEG** | **0.004837812** |
| **5213** |  | **POS** | **0.001901514** |
| **5214** | **dTDP-4-oxo-2,3,6-trideoxy-D-glucose** | **POS** | **0.003617636** |
| **5217** | **6-(4-Azanyl-4-Methyl-Piperidin-1-Yl)-3-[2,3-Bis(Chloranyl)phenyl]pyrazin-2-Amine** | **POS** | **0.011604354** |
| **5218** |  | **POS** | **0.002063288** |
| **5221** | **dTDP-3-amino-3,4,6-trideoxy-D-glucose** | **POS** | **0.004666122** |
| **5222** | **dTDP-L-olivose** | **POS** | **0.003001412** |
| **5229** |  | **POS** | **0.004954013** |
| **5230** |  | **POS** | **0.013896338** |
| **5237** |  | **NEG** | **0.012449896** |
| **5242** |  | **NEG** | **0.004428543** |
| **5246** |  | **NEG** | **0.015895992** |
| **5255** |  | **NEG** | **0.046659902** |
| **5256** | **RACLOPRIDE** | **POS** | **0.026144566** |
| **5257** |  | **NEG** | **0.012624658** |
| **5262** |  | **NEG** | **0.038673942** |
| **5265** |  | **NEG** | **0.016746317** |
| **5268** |  | **NEG** | **0.002826125** |
| **5269** |  | **NEG** | **0.003336678** |
| **5270** | **ascorbic acid citrate** | **NEG** | **0.004283556** |
| **5271** | **Nitroquine** | **NEG** | **0.002251262** |
| **5272** | **Fosfluconazole** | **NEG** | **0.004244315** |
| **5273** |  | **NEG** | **0.017074704** |
| **5274** |  | **NEG** | **0.040504758** |
| **5284** | **Benzenepropanoic acid, 4-hydroxy-alpha-(2-((3-(hydroxyamino)-3-oxo-1-(phenylmethyl)propyl)amino)-2-oxoethyl)-3-iodo-** | **POS** | **0.026408268** |
| **5285** |  | **NEG** | **0.001047623** |
| **5286** | **3h-Felodipine** | **NEG** | **0.003743444** |
| **5287** |  | **NEG** | **0.004485667** |
| **5296** |  | **NEG** | **0.016517572** |
| **5318** | **5-Hydroxyxanthotoxin** | **NEG** | **0.004190235** |
| **5337** |  | **NEG** | **0.003774683** |
| **5343** |  | **NEG** | **0.047971263** |
| **5349** | **Monoglyceride citrate** | **POS** | **0.047831741** |
| **5350** |  | **POS** | **0.039319408** |
| **5368** |  | **POS** | **0.049960226** |
| **5373** |  | **POS** | **0.037151276** |
| **5379** |  | **POS** | **0.003232651** |
| **5407** |  | **NEG** | **0.048520045** |
| **5413** |  | **POS** | **0.042978594** |
| **5416** |  | **NEG** | **0.047837816** |
| **5417** |  | **NEG** | **0.029621049** |
| **5421** |  | **NEG** | **0.010569362** |
| **5422** |  | **NEG** | **0.000836266** |
| **5426** |  | **NEG** | **0.016804984** |
| **5429** |  | **NEG** | **0.018137515** |
| **5430** |  | **NEG** | **0.029387658** |
| **5431** |  | **NEG** | **0.002903429** |
| **5432** |  | **NEG** | **0.003459647** |
| **5433** |  | **NEG** | **0.0107515** |
| **5434** |  | **NEG** | **0.048490059** |
| **5435** | **3'-O-(4-Benzoyl)benzoyl ATP** | **NEG** | **0.001582247** |
| **5437** |  | **NEG** | **0.038371807** |
| **5438** |  | **NEG** | **0.025213001** |
| **5439** |  | **NEG** | **0.04449207** |
| **5442** |  | **NEG** | **0.020453482** |
| **5443** |  | **NEG** | **0.011950388** |
| **5444** |  | **NEG** | **0.013561445** |
| **5447** |  | **NEG** | **0.008122153** |
| **5455** |  | **POS** | **0.042238186** |
| **5459** |  | **POS** | **0.015013049** |
| **5460** |  | **POS** | **0.007604225** |
| **5461** |  | **POS** | **0.007817663** |
| **5469** | **Fosaprepitant** | **NEG** | **0.027717507** |
| **5471** |  | **POS** | **0.038564889** |
| **5477** |  | **NEG** | **0.000527343** |
| **5479** |  | **NEG** | **0.013998475** |
| **5484** |  | **NEG** | **0.000442853** |
| **5488** |  | **NEG** | **0.014768802** |
| **5493** |  | **POS** | **0.015982066** |
| **5497** |  | **NEG** | **0.008210262** |
| **5519** |  | **NEG** | **0.002770254** |
| **5521** |  | **NEG** | **0.002411329** |
| **5522** |  | **NEG** | **0.033566126** |
| **5526** |  | **NEG** | **0.034393095** |
| **5527** |  | **NEG** | **0.035402669** |
| **5550** |  | **NEG** | **0.001716719** |
| **5552** |  | **NEG** | **0.02700764** |
| **5555** |  | **NEG** | **0.026778691** |
| **5561** | **dTDP-D-mycaminose** | **POS** | **0.006519016** |
| **5562** |  | **POS** | **0.013194238** |
| **5564** | **dTDP-4-dimethylamino-4,6-dideoxy-5-C-methyl-L-mannose** | **POS** | **0.003804022** |
| **5565** |  | **POS** | **0.040073983** |
| **5570** | **2-(Hydroxymethyl)-3-(acetamidomethylene)succite** | **NEG** | **0.027845565** |
| **5574** | **cis-(Homo)3-aconitate** | **POS** | **0.003478217** |
| **5575** | **Lamivudine-monophosphate** | **POS** | **0.00229459** |
| **5579** |  | **POS** | **0.021329151** |
| **5580** |  | **POS** | **0.008309172** |
| **5581** |  | **POS** | **0.007910431** |
| **5582** | **Diethylthiophosphoric acid** | **NEG** | **0.035570289** |
| **5589** |  | **NEG** | **0.004501615** |
| **5599** |  | **POS** | **0.002821451** |
| **5600** | **6-Succinoaminopurine** | **POS** | **0.002328383** |
| **5602** | **Fluazifop** | **POS** | **0.005386823** |
| **5604** |  | **POS** | **0.031075668** |
| **5605** |  | **POS** | **0.002779168** |
| **5606** |  | **POS** | **0.000651593** |
| **5610** |  | **POS** | **0.00525819** |
| **5613** | **Sanguisorbic acid dilactone** | **POS** | **0.004864097** |
| **5614** | **CDP-N-dimethylethanolamine** | **POS** | **0.00490521** |
| **5615** |  | **POS** | **0.003055248** |
| **5616** |  | **POS** | **0.004997026** |
| **5617** |  | **POS** | **0.001611981** |
| **5618** |  | **POS** | **0.002947847** |
| **5619** |  | **POS** | **0.000616301** |
| **5620** |  | **POS** | **0.001460056** |
| **5621** |  | **POS** | **0.011377334** |
| **5622** |  | **POS** | **0.025095663** |
| **5623** | **2-Galloyl-1,4-galactarolactone methyl ester** | **POS** | **0.008053791** |
| **5624** | **2,4,5-Tribromo-1-(4-chlorobenzoyl)imidazole** | **POS** | **0.044176236** |
| **5635** | **4-Deoxy-beta-D-gluc-4-enuronosyl-(1,3)-N-acetyl-D-galactosamine** | **POS** | **0.00038588** |
| **5651** |  | **POS** | **0.019187451** |
| **5674** | **UDP-L-Ara4FN** | **NEG** | **0.029428496** |
| **5684** | **4',6-Dichloroflavan** | **POS** | **0.010859917** |
| **5693** |  | **POS** | **0.029036339** |
| **5704** | **1-phthaleneacetic acid sodium salt** | **POS** | **0.003775625** |
| **5712** | **Propan-2-yl 2-hydroxy-4-methylsulfanylbutanoate** | **NEG** | **0.001028655** |
| **5715** |  | **NEG** | **0.03837888** |
| **5716** | **alpha-D-Ribose 1-methylphosphote 5-triphosphate** | **NEG** | **0.038794228** |
| **5748** | **Perphenazine decanoate** | **NEG** | **0.017218091** |
| **5758** | **Methylphosphote** | **NEG** | **0.045928788** |
| **5761** |  | **POS** | **0.041571042** |
| **5763** |  | **POS** | **0.000117134** |
| **5764** |  | **POS** | **0.000356832** |
| **5766** | **5'-Methylthioadenosine** | **POS** | **0.00973555** |
| **5767** |  | **POS** | **0.000952026** |
| **5773** | **Calcium pantothenate, calcium chloride double salt** | **POS** | **0.000693353** |
| **5775** |  | **POS** | **0.000321974** |
| **5776** |  | **POS** | **0.000922171** |
| **5777** |  | **POS** | **0.003379339** |
| **5778** | **Adenosine 5-O-(3-thiotriphophate)** | **POS** | **0.007958518** |
| **5780** |  | **POS** | **0.021192053** |
| **5783** | **1,3,5-Trinitrobenzene** | **POS** | **8.22009E-05** |
| **5784** |  | **POS** | **0.000606632** |
| **5785** |  | **POS** | **0.047880834** |
| **5791** |  | **POS** | **0.000510086** |
| **5792** | **Calcium phosphinate** | **POS** | **0.000928654** |
| **5793** |  | **POS** | **0.000360695** |
| **5794** |  | **POS** | **0.000198845** |
| **5802** | **2-epi-5-epi-Valiolone 7-phosphate** | **NEG** | **0.025065054** |
| **5804** |  | **NEG** | **0.003048921** |
| **5811** |  | **NEG** | **0.013441109** |
| **5813** | **6-Fluoropyridoxal** | **NEG** | **0.025102508** |
| **5822** |  | **NEG** | **0.020556435** |
| **5829** |  | **NEG** | **0.011663974** |
| **5836** |  | **POS** | **7.44738E-05** |
| **5837** | **2-Phosphinomethylmalate** | **POS** | **0.000487151** |
| **5839** | **N2-Acetyl-L-aminoadipyl-delta-phosphate** | **POS** | **0.000383606** |
| **5841** |  | **POS** | **0.028665001** |
| **5843** |  | **NEG** | **0.013953387** |
| **5844** |  | **NEG** | **0.000638019** |
| **5845** |  | **POS** | **0.000730612** |
| **5850** |  | **POS** | **0.032992224** |
| **5851** |  | **POS** | **0.00362833** |
| **5852** | **Dichlorphemide** | **POS** | **0.000185375** |
| **5858** |  | **POS** | **0.003630175** |
| **5861** |  | **POS** | **0.000141069** |
| **5862** |  | **POS** | **0.002322821** |
| **5863** |  | **POS** | **0.015078771** |
| **5864** |  | **POS** | **0.003673744** |
| **5868** |  | **POS** | **0.046618189** |
| **5869** |  | **POS** | **0.005617229** |
| **5870** | **UDP-L-Ara4N** | **POS** | **0.000584415** |
| **5899** | **Ibandronate** | **NEG** | **0.002194863** |
| **5900** |  | **NEG** | **0.008400409** |
| **5901** |  | **NEG** | **0.005681872** |
| **5915** |  | **NEG** | **0.035523031** |
| **5920** |  | **NEG** | **0.000601876** |
| **5923** | **Caffeic acid sulfate** | **POS** | **0.021426997** |
| **5932** |  | **NEG** | **0.003896978** |
| **5934** | **SWEP** | **NEG** | **0.01518109** |
| **5941** |  | **NEG** | **0.03865616** |
| **5945** |  | **NEG** | **0.045183058** |
| **5950** | **6-Deoxy-6-sulfo-D-fructose 1-phosphate** | **NEG** | **0.014257479** |
| **5951** |  | **NEG** | **0.005986927** |
| **5956** | **dTDP-3-amino-2,3,6-trideoxy-4-keto-D-glucose** | **POS** | **0.029642017** |
| **5957** | **dTDP-4-oxo-2,6-dideoxy-L-allose** | **POS** | **0.003288828** |
| **5968** |  | **NEG** | **0.002153484** |
| **5970** |  | **NEG** | **0.047279934** |
| **5973** | **5-(5-Iodo-4-methoxy-2-propan-2-ylphenoxy)pyrimidine-2,4-diamine** | **NEG** | **0.000168359** |
| **5974** |  | **NEG** | **0.030092111** |
| **5975** |  | **NEG** | **0.02049241** |
| **5977** |  | **NEG** | **0.020899729** |
| **5978** |  | **NEG** | **0.021934148** |
| **5979** | **[3-Methoxy-2-phosphonooxy-6-[(E)-2-(3,4,5-trimethoxyphenyl)ethenyl]phenyl] dihydrogen phosphate** | **NEG** | **0.018600793** |
| **5984** |  | **NEG** | **0.039001296** |
| **6003** |  | **NEG** | **0.039786876** |
| **6010** |  | **NEG** | **0.029885164** |
| **6024** |  | **POS** | **0.034200776** |
| **6038** |  | **NEG** | **0.019827806** |
| **6041** |  | **NEG** | **5.442E-06** |
| **6043** |  | **NEG** | **0.001089835** |
| **6044** |  | **NEG** | **0.001132909** |
| **6048** |  | **NEG** | **0.008963689** |
| **6050** | **N6-Monobutyryl-cAMP** | **NEG** | **0.003186791** |
| **6052** |  | **NEG** | **0.000800803** |
| **6054** |  | **NEG** | **0.021456492** |
| **6055** |  | **NEG** | **0.001028916** |
| **6060** |  | **NEG** | **0.043552224** |
| **6063** |  | **NEG** | **0.045529031** |
| **6070** | **Guanosine diphosphate adenosine** | **NEG** | **0.0241666** |
| **6072** |  | **NEG** | **0.009507097** |
| **6073** |  | **NEG** | **0.003334071** |
| **6077** | **m-Carboxyphenyl phenylacetamidomethylphosphote** | **NEG** | **0.000398835** |
| **6079** |  | **NEG** | **0.04461188** |
| **6085** |  | **NEG** | **0.01666859** |
| **6090** | **3-Hydroxykynurenine** | **NEG** | **0.003068136** |
| **6092** |  | **NEG** | **0.018627029** |
| **6094** |  | **NEG** | **0.046573723** |
| **6095** |  | **NEG** | **0.003768707** |
| **6099** | **Sceptrin** | **NEG** | **0.028452252** |
| **6100** |  | **NEG** | **0.032266827** |
| **6101** |  | **NEG** | **0.023121641** |
| **6106** |  | **NEG** | **0.026872084** |
| **6112** | **N6-(1,2-Dicarboxyethyl)-AMP** | **NEG** | **0.026157929** |
| **6125** | **Dinicozole** | **POS** | **0.001593174** |
| **6132** |  | **POS** | **0.00048751** |
| **6133** |  | **POS** | **0.040261692** |
| **6140** | **Urate-3-ribonucleoside** | **POS** | **0.001230535** |
| **6141** |  | **POS** | **0.009022614** |
| **6152** | **Clomeprop** | **NEG** | **0.019234958** |
| **6157** |  | **POS** | **0.001262829** |
| **6158** | **Alinidine** | **POS** | **0.042563826** |
| **6159** | **Cycloguanil hydrochloride** | **POS** | **0.022396427** |
| **6160** |  | **POS** | **0.003032253** |
| **6165** |  | **POS** | **0.021415499** |
| **6166** |  | **POS** | **0.016446064** |
| **6169** |  | **NEG** | **0.026713574** |
| **6171** |  | **NEG** | **0.028039351** |
| **6172** |  | **POS** | **0.032979417** |
| **6173** | **Niflumic acid** | **POS** | **0.011459268** |
| **6175** |  | **POS** | **0.002767696** |
| **6182** |  | **NEG** | **6.19151E-05** |
| **6183** | **2-Amino-5-(5-nitro-2-furyl)-1,3,4-thiadiazole** | **POS** | **0.010429572** |
| **6184** |  | **POS** | **0.000450005** |
| **6185** |  | **POS** | **0.020406681** |
| **6192** |  | **NEG** | **0.000288618** |
| **6193** |  | **NEG** | **0.001012709** |
| **6206** | **Acetyl citrate** | **POS** | **0.000831475** |
| **6207** | **Flumazenil** | **POS** | **1.05773E-06** |
| **6208** | **beta-Cotonefuran** | **POS** | **0.000172201** |
| **6209** |  | **POS** | **0.000649326** |
| **6215** |  | **NEG** | **0.001271355** |
| **6217** |  | **NEG** | **6.95879E-07** |
| **6218** | **(2-Carbamoyl-7-oxo-1,6-diazabicyclo[3.2.1]octan-6-yl) hydrogen sulfate** | **POS** | **0.000186733** |
| **6233** |  | **NEG** | **0.012542854** |
| **6239** |  | **POS** | **0.040581961** |
| **6248** | **[(2S)-1-(4-Amino-2-oxopyrimidin-1-yl)-3-hydroxypropan-2-yl]oxymethyl-phosphonooxyphosphinic acid** | **POS** | **2.69377E-05** |
| **6256** |  | **POS** | **0.003271518** |
| **6258** |  | **POS** | **0.001832249** |
| **6259** |  | **POS** | **4.92632E-05** |
| **6260** |  | **POS** | **0.000647789** |
| **6262** |  | **POS** | **0.000895495** |
| **6263** | **CMP-2-aminoethylphosphote** | **POS** | **0.003161525** |
| **6264** | **Adenosine 5-O-(3-thiodiphophate)** | **POS** | **0.007394359** |
| **6266** |  | **NEG** | **0.010520195** |
| **6276** | **Sodium (4-methoxybenzoyloxy)acetate** | **NEG** | **0.000581784** |
| **6283** |  | **NEG** | **0.040080449** |
| **6284** | **[Nitrilotris(methylene)]trisphosphonic acid** | **NEG** | **0.028608787** |
| **6288** |  | **NEG** | **0.038818876** |
| **6323** |  | **NEG** | **0.019881439** |
| **6324** |  | **NEG** | **0.023955211** |
| **6326** |  | **NEG** | **0.018791551** |
| **6327** |  | **NEG** | **0.019393456** |
| **6328** |  | **NEG** | **0.023064315** |
| **6329** |  | **NEG** | **0.029706966** |
| **6350** |  | **NEG** | **0.035685348** |
| **6357** |  | **NEG** | **0.009040883** |
| **6401** | **(2S)-2-[(2-Carboxy-2-oxoethyl)amino]pentanedioic acid** | **NEG** | **0.026500997** |
| **6408** |  | **POS** | **0.032054519** |
| **6413** | **(2-Iodo-5-nitrophenyl)(1-((1-methylpiperidin-2-yl)methyl)-1H-indol-3-yl)methanone** | **POS** | **0.022909166** |
| **6414** |  | **POS** | **0.007515826** |
| **6416** | **3-Sulfocatechol** | **POS** | **0.016198948** |
| **6421** |  | **POS** | **0.018266764** |
| **6424** | **2-Hydroxy-6-oxono-2,4-diene-1,9-dioate** | **POS** | **0.001401328** |
| **6427** | **Urolithin c 3-sulfate** | **POS** | **0.024924009** |
| **6428** |  | **POS** | **0.001937876** |
| **6429** |  | **POS** | **0.026965412** |
| **6430** |  | **POS** | **0.001074764** |
| **6431** |  | **POS** | **0.002696866** |
| **6432** |  | **POS** | **0.001052315** |
| **6433** |  | **POS** | **0.001180098** |
| **6434** |  | **POS** | **0.004683954** |
| **6435** |  | **POS** | **0.000669531** |
| **6436** |  | **POS** | **0.003481826** |
| **6452** |  | **NEG** | **0.013639824** |
| **6454** |  | **POS** | **0.004769387** |
| **6455** |  | **POS** | **0.002046545** |
| **6457** | **N-(6-Oxo-6H-dibenzo[b,d]pyran-3-yl)-2,2,2-trifluoroacetamide** | **POS** | **0.001615001** |
| **6460** |  | **POS** | **0.001125148** |
| **6461** |  | **POS** | **0.001194879** |
| **6462** | **dTDP-3-methyl-4-oxo-2,6-dideoxy-L-allose** | **POS** | **0.008750842** |
| **6463** |  | **POS** | **0.007249816** |
| **6464** |  | **POS** | **0.005254026** |
| **6465** |  | **POS** | **0.007823233** |
| **6466** | **dTDP-2,3,6-trideoxy-3-C-methyl-4-O-methyl-3-nitroso-beta-L-arabino-hexopyranose** | **POS** | **0.001258716** |
| **6467** |  | **POS** | **0.003478067** |
| **6469** | **dTDP-D-mycaminose** | **POS** | **0.004208671** |
| **6470** | **Benzenemethanol, 4-(1-(3,4-bis(difluoromethoxy)phenyl)-2-(3-methyl-1-oxido-4-pyridinyl)ethyl)-alpha,alpha-bis(trifluoromethyl)-** | **POS** | **0.002158719** |
| **6471** |  | **POS** | **0.002138706** |
| **6472** | **TG(20:1(11Z)/22:5(4Z,7Z,10Z,13Z,16Z)/20:1(11Z))** | **POS** | **0.013199011** |
| **6474** |  | **POS** | **0.02769204** |
| **6475** |  | **POS** | **0.04179474** |
| **6476** |  | **POS** | **0.002403837** |
| **6477** | **Atiprimod** | **POS** | **0.006060639** |
| **6478** | **2-Maleylacetate** | **POS** | **0.00955536** |
| **6480** | **2-Amino-3-(3-fluoro-4,5-dihydroxyphenyl)propanoic acid** | **POS** | **0.000912478** |
| **6481** | **Dicarbamoyl (2S)-2-aminopentanedioate** | **POS** | **0.001531437** |
| **6483** |  | **POS** | **0.001711266** |
| **6484** |  | **POS** | **0.001793424** |
| **6486** |  | **POS** | **0.000848554** |
| **6490** |  | **POS** | **0.000507763** |
| **6493** |  | **POS** | **0.000215912** |
| **6494** | **Benzoic acid, 2-[3,6-bis(acetyloxy)-2,7-dichloro-9H-xanthen-9-yl]-** | **POS** | **0.00060412** |
| **6495** |  | **POS** | **0.00610518** |
| **6496** |  | **POS** | **0.002686836** |
| **6498** | **dTDP-L-mycarose** | **POS** | **0.009256689** |
| **6499** |  | **POS** | **0.014088278** |
| **6504** | **dTDP-4-amino-4,6-dideoxy-D-glucose** | **POS** | **0.037872629** |
| **6506** |  | **POS** | **0.009997686** |
| **6507** | **TG(22:4(7Z,10Z,13Z,16Z)/18:2(9Z,12Z)/22:5(7Z,10Z,13Z,16Z,19Z))** | **POS** | **0.046197205** |
| **6511** |  | **POS** | **0.009859916** |
| **6512** | **(16Z)-14-Hydroxydocos-16-enoylcarnitine** | **POS** | **0.020673838** |
| **6525** |  | **POS** | **0.020672291** |
| **6526** |  | **POS** | **0.000262662** |
| **6541** | **Stipitatate** | **NEG** | **0.011273703** |
| **6563** | **N-Acetoxy-4-aminobiphenyl** | **POS** | **6.66855E-05** |
| **6565** | **1-(3-Fluoro-4-hydroxy-5-mercaptomethyltetrahydrofuran-2-yl)-5-methylpyrimidine-2,4(1H,3H)-dione** | **POS** | **0.000114794** |
| **6566** |  | **POS** | **0.035459888** |
| **6574** |  | **POS** | **0.004574074** |
| **6582** |  | **NEG** | **0.03360301** |
| **6584** | **2-(Formamido)-N1-(5'-phosphoribosyl)acetamidine** | **NEG** | **0.020163308** |
| **6585** |  | **NEG** | **0.007633842** |
| **6586** |  | **NEG** | **0.030675204** |
| **6587** |  | **NEG** | **0.027057165** |
| **6588** |  | **NEG** | **0.020963331** |
| **6592** |  | **NEG** | **0.005732704** |
| **6596** |  | **NEG** | **0.009988814** |
| **6599** |  | **NEG** | **0.001230587** |
| **6605** |  | **NEG** | **0.020327912** |
| **6616** | **Clomeprop** | **POS** | **0.000146305** |
| **6620** |  | **NEG** | **0.004875913** |
| **6632** | **2-[(2R,5Z)-2-Carboxy-4-methylthiazol-5(2H)-ylidene]ethyl phosphate** | **NEG** | **0.018297596** |
| **6634** |  | **NEG** | **0.026604723** |
| **6636** | **Mitobronitol** | **NEG** | **0.014969545** |
| **6637** | **2,3,4,5-Tetrachloro-4'-biphenylol** | **NEG** | **0.022875583** |
| **6643** | **Deoxyribose triphosphate** | **NEG** | **0.04497888** |
| **6646** |  | **NEG** | **0.004538555** |
| **6648** |  | **NEG** | **0.01868905** |
| **6649** | **Creatine phosphate lactate** | **NEG** | **0.032064305** |
| **6650** | **dTDP-3,4-dioxo-2,6-dideoxy-D-glucose** | **NEG** | **0.029524847** |
| **6668** |  | **NEG** | **0.02217494** |
| **6670** | **N(alpha)-Phosphorylalanylproline** | **NEG** | **0.018857256** |
| **6673** |  | **NEG** | **0.03105357** |
| **6675** | **1-(5'-Phosphoribosyl)-5-formamido-4-imidazolecarboxamide** | **NEG** | **0.005506419** |
| **6678** |  | **NEG** | **0.008437578** |
| **6689** |  | **NEG** | **0.009970695** |
| **6701** | **Clitidine 5'-phosphate** | **NEG** | **0.00773993** |
| **6705** |  | **NEG** | **0.047801049** |
| **6715** |  | **NEG** | **0.000330747** |
| **6716** | **MC-5127** | **NEG** | **0.018750343** |
| **6718** |  | **NEG** | **0.000647662** |
| **6722** |  | **NEG** | **0.023781175** |
| **6730** |  | **NEG** | **0.004376174** |
| **6743** |  | **NEG** | **0.000903879** |
| **6749** | **Deltamethrin** | **NEG** | **0.015262212** |
| **6759** |  | **NEG** | **0.007751978** |
| **6762** |  | **NEG** | **0.038868133** |
| **6765** |  | **NEG** | **0.02452528** |
| **6766** |  | **NEG** | **0.026348632** |
| **6769** |  | **NEG** | **0.006379519** |
| **6773** |  | **NEG** | **0.012958295** |
| **6774** | **ADPribose 2'-phosphate** | **NEG** | **0.01139601** |
| **6775** |  | **NEG** | **0.002531836** |
| **6776** |  | **NEG** | **0.00132164** |
| **6783** |  | **NEG** | **0.010494159** |
| **6786** |  | **NEG** | **0.002370917** |
| **6798** |  | **NEG** | **0.008294219** |
| **6801** |  | **NEG** | **0.004193839** |
| **6804** |  | **NEG** | **0.000668893** |
| **6808** |  | **NEG** | **0.004322139** |
| **6813** |  | **NEG** | **0.045075482** |
| **6815** |  | **NEG** | **0.002099323** |
| **6820** |  | **NEG** | **0.027326155** |
| **6824** |  | **POS** | **0.040976056** |
| **6830** |  | **POS** | **0.022525697** |
| **6832** | **PIP2(16:0/22:4(10Z,13Z,16Z,19Z))** | **POS** | **0.048485985** |
| **6837** |  | **NEG** | **0.032093778** |
| **6838** |  | **NEG** | **0.018405446** |
| **6841** |  | **NEG** | **0.001430697** |
| **6842** |  | **NEG** | **0.025449843** |
| **6845** |  | **NEG** | **0.016902359** |
| **6854** |  | **NEG** | **0.047688991** |
| **6855** |  | **NEG** | **0.018106585** |
| **6866** |  | **NEG** | **0.040876929** |
| **6870** |  | **NEG** | **0.015368027** |
| **6873** |  | **NEG** | **0.001375109** |
| **6883** |  | **NEG** | **0.009207584** |
| **6887** |  | **NEG** | **0.008763615** |
| **6899** |  | **POS** | **0.009276948** |
| **6915** |  | **NEG** | **9.19526E-05** |
| **6916** |  | **NEG** | **0.00983403** |
| **6917** |  | **NEG** | **0.001299877** |
| **6941** |  | **POS** | **0.001173407** |
| **6942** |  | **POS** | **0.036643519** |
| **6943** |  | **POS** | **0.00158366** |
| **6944** |  | **POS** | **0.044011802** |
| **6949** |  | **POS** | **0.006370716** |
| **6954** |  | **POS** | **0.019607652** |
| **6955** | **Adenosine 5-O-(3-thiodiphophate)** | **POS** | **0.005839447** |
| **6956** |  | **POS** | **0.005337175** |
| **6960** |  | **NEG** | **0.001346072** |
| **6961** |  | **NEG** | **0.003101333** |
| **6962** |  | **NEG** | **0.041568736** |
| **6963** |  | **NEG** | **0.015815297** |
| **6966** |  | **NEG** | **0.014317763** |
| **6967** | **fluvoxamino acid** | **POS** | **0.035481124** |
| **6970** | **Norsanguinarine** | **POS** | **0.047055082** |
| **6971** |  | **POS** | **0.001296145** |
| **6977** |  | **NEG** | **7.73165E-06** |
| **6994** |  | **NEG** | **0.032490974** |
| **7001** | **alpha,alpha'-Trehalose 6-phosphate** | **NEG** | **0.000403996** |
| **7002** |  | **NEG** | **0.000418547** |
| **7003** |  | **NEG** | **0.034562183** |
| **7004** |  | **NEG** | **9.01284E-05** |
| **7007** |  | **POS** | **0.010384611** |
| **7008** |  | **POS** | **0.002709989** |
| **7009** |  | **NEG** | **0.004296346** |
| **7013** |  | **POS** | **3.70395E-05** |
| **7018** |  | **NEG** | **0.002006953** |
| **7021** |  | **POS** | **0.010548642** |
| **7022** |  | **POS** | **0.023554676** |
| **7029** |  | **NEG** | **0.028391017** |
| **7036** |  | **NEG** | **6.7019E-05** |
| **7037** |  | **NEG** | **0.006770406** |
| **7041** |  | **NEG** | **0.028642827** |
| **7048** |  | **NEG** | **0.005663299** |
| **7050** |  | **NEG** | **0.007599356** |
| **7060** |  | **NEG** | **0.012998179** |
| **7063** |  | **NEG** | **0.000692443** |
| **7064** |  | **NEG** | **0.000258063** |
| **7065** |  | **NEG** | **0.006426202** |
| **7066** |  | **NEG** | **0.002377618** |
| **7068** |  | **NEG** | **0.001960289** |
| **7069** |  | **NEG** | **0.000275549** |
| **7070** |  | **POS** | **0.006597394** |
| **7076** |  | **NEG** | **0.004074941** |
| **7078** |  | **NEG** | **0.024211109** |
| **7085** |  | **POS** | **0.012311112** |
| **7094** |  | **NEG** | **0.009048242** |
| **7096** | **Aurothioglucose** | **NEG** | **0.003859276** |
| **7100** | **Diacetyldichlorofluorescein** | **NEG** | **0.043769747** |
| **7101** |  | **NEG** | **0.034338388** |
| **7110** | **1-phthaleneacetic acid sodium salt** | **POS** | **0.002380111** |
| **7126** | **Dihydroneopterin phosphate** | **NEG** | **0.004511903** |
| **7129** |  | **NEG** | **0.001766662** |
| **7130** |  | **NEG** | **0.024693484** |
| **7131** |  | **NEG** | **0.001061683** |
| **7132** |  | **NEG** | **0.014001953** |
| **7133** |  | **NEG** | **0.007297159** |
| **7140** |  | **POS** | **0.0005041** |
| **7142** |  | **POS** | **0.000424952** |
| **7146** |  | **NEG** | **0.004322742** |
| **7152** |  | **NEG** | **0.001302641** |
| **7153** |  | **NEG** | **0.009725262** |
| **7154** | **Purine mononucleotide** | **POS** | **0.030128149** |
| **7156** |  | **POS** | **0.003784424** |
| **7157** | **2-hydroxy-5-(methylthio)-3-oxopent-1-enyl phosphate** | **POS** | **0.031223947** |
| **7158** | **5'-Butyrylphosphouridine** | **POS** | **0.042710221** |
| **7159** | **Dichloromethotrexate** | **POS** | **0.008028717** |
| **7160** |  | **POS** | **0.007510741** |
| **7161** |  | **NEG** | **0.006614535** |
| **7170** | **Neridronic acid** | **NEG** | **0.028647311** |
| **7176** |  | **NEG** | **0.04978412** |
| **7183** |  | **POS** | **0.044263936** |
| **7192** |  | **POS** | **0.007022169** |
| **7199** | **Ethanediperoxoic acid** | **POS** | **0.007681565** |
| **7204** |  | **POS** | **0.018138717** |
| **7207** |  | **POS** | **0.004001925** |
| **7218** |  | **NEG** | **0.022219182** |
| **7219** |  | **POS** | **0.013082711** |
| **7227** |  | **NEG** | **0.017690918** |
| **7231** |  | **NEG** | **0.005882229** |
| **7234** |  | **NEG** | **0.002267966** |
| **7237** |  | **POS** | **0.007304073** |
| **7240** |  | **NEG** | **0.019404564** |
| **7241** |  | **NEG** | **0.006638893** |
| **7242** |  | **POS** | **0.003862346** |
| **7249** |  | **POS** | **0.018766182** |
| **7253** |  | **NEG** | **0.048576412** |
| **7256** |  | **POS** | **0.000140047** |
| **7264** |  | **POS** | **0.009039477** |
| **7269** |  | **POS** | **0.000700958** |
| **7271** |  | **NEG** | **0.000530734** |
| **7272** |  | **POS** | **0.007266707** |
| **7277** |  | **POS** | **0.019371183** |
| **7278** | **N-(3,5-Dichloropyrid-4-yl)-(1-(4-fluorobenzyl)-5-hydroxy-indole-3-yl)glyoxylic acid amide** | **NEG** | **0.009516056** |
| **7279** |  | **NEG** | **0.031107954** |
| **7297** | **Dopachrome o-semiquinone** | **NEG** | **0.010807859** |
| **7301** | **2,4-Dioxotetrahydropyrimidine D-ribonucleotide** | **NEG** | **0.001773518** |
| **7331** |  | **NEG** | **0.002024745** |
| **7334** | **3',5'-Cyclic IMP** | **NEG** | **0.003674135** |
| **7340** |  | **POS** | **4.07425E-05** |
| **7343** |  | **NEG** | **0.004930069** |
| **7355** |  | **POS** | **0.030499345** |
| **7360** |  | **NEG** | **0.015312384** |
| **7366** |  | **NEG** | **0.002373505** |
| **7368** |  | **NEG** | **0.000100772** |
| **7369** | **2-O-Galloyl-1,4-galactarolactone** | **POS** | **0.010426067** |
| **7371** | **2-Carboxy-2-hydroxy-8-carboxychromene** | **POS** | **0.033773868** |
| **7373** |  | **POS** | **0.003414623** |
| **7376** |  | **POS** | **0.019081554** |
| **7377** |  | **NEG** | **0.00374172** |
| **7380** |  | **NEG** | **0.033831442** |
| **7389** |  | **NEG** | **0.000886125** |
| **7390** |  | **NEG** | **0.020151606** |
| **7395** |  | **NEG** | **0.001793079** |
| **7399** |  | **NEG** | **0.003049527** |
| **7403** |  | **NEG** | **0.032462193** |
| **7406** | **Benzenepropanoic acid, 4-hydroxy-alpha-(2-((3-(hydroxyamino)-3-oxo-1-(phenylmethyl)propyl)amino)-2-oxoethyl)-3-iodo-** | **NEG** | **0.008932527** |
| **7407** |  | **NEG** | **0.028001382** |
| **7408** |  | **NEG** | **0.031600632** |
| **7411** |  | **NEG** | **0.003938814** |
| **7412** |  | **POS** | **0.017215147** |
| **7413** |  | **POS** | **0.005891223** |
| **7423** |  | **NEG** | **0.039272406** |
| **7424** |  | **NEG** | **0.014535901** |
| **7439** |  | **NEG** | **0.035275464** |
| **7441** |  | **NEG** | **0.021191861** |
| **7454** | **Phosphocysteamine** | **NEG** | **0.002736515** |
| **7464** | **UDP-L-Ara4O** | **NEG** | **0.001234441** |
| **7473** |  | **NEG** | **0.010345875** |
| **7478** | **2-(alpha-D-Mannosyl)-3-phosphoglycerate** | **NEG** | **0.014683094** |
| **7480** | **N-(2,4-Dichlorobenzyl)-2,2,2-trifluoro-N-(3-nitrophenyl)acetamide** | **NEG** | **0.008478842** |
| **7484** |  | **NEG** | **0.009928296** |
| **7486** |  | **NEG** | **0.004814463** |
| **7487** |  | **NEG** | **0.011114607** |
| **7489** |  | **POS** | **0.008758332** |
| **7500** | **Azacozole** | **NEG** | **0.027357514** |
| **7501** |  | **NEG** | **0.018232362** |
| **7508** |  | **POS** | **0.020579746** |
| **7510** |  | **NEG** | **0.000978666** |
| **7513** |  | **NEG** | **0.011362162** |
| **7515** | **4-(Cytidine 5'-diphospho)-2-C-methyl-D-erythritol** | **POS** | **0.033109618** |
| **7516** |  | **NEG** | **0.017186927** |
| **7519** | **Uracil mustard** | **NEG** | **0.041022606** |
| **7532** |  | **NEG** | **8.76396E-05** |
| **7541** |  | **NEG** | **0.005567975** |
| **7548** | **Oxaloglutarate** | **NEG** | **0.001674968** |
| **7549** |  | **NEG** | **0.001064518** |
| **7552** |  | **NEG** | **0.014348806** |
| **7554** | **8-Quinolinol, 5,7-dichloro-2-((dimethylamino)methyl)-** | **POS** | **0.005284259** |
| **7557** | **N-Trimethyl-2-aminoethylphosphote** | **NEG** | **0.046723785** |
| **7570** |  | **NEG** | **0.028321788** |
| **7578** | **1H-Indole-2-carbonitrile, 4-(2-hydroxy-3-((1-methylethyl)amino)propoxy)-3-iodo-** | **NEG** | **0.004094945** |
| **7581** |  | **NEG** | **0.00868509** |
| **7584** | **Sodium phosphate (Na(H2PO4))** | **NEG** | **0.008394239** |
| **7589** |  | **NEG** | **0.000564426** |
| **7590** |  | **NEG** | **0.003437002** |
| **7591** |  | **NEG** | **0.001473689** |
| **7596** | **4-Hydroxylamino-2,6-dinitrotoluene** | **NEG** | **0.03368612** |
| **7601** |  | **NEG** | **0.020958899** |
| **7603** |  | **NEG** | **0.02875107** |
| **7607** |  | **NEG** | **0.013279251** |
| **7609** |  | **NEG** | **0.029389014** |
| **7611** |  | **NEG** | **0.043178854** |
| **7612** |  | **NEG** | **6.67834E-05** |
| **7613** |  | **NEG** | **0.001875934** |
| **7615** |  | **NEG** | **0.00247462** |
| **7616** |  | **NEG** | **0.013296807** |
| **7621** | **4-Phospho-L-aspartate** | **NEG** | **0.000871298** |
| **7624** | **Sodium sulfate decahydrate** | **NEG** | **0.005898743** |
| **7627** |  | **NEG** | **0.000121083** |
| **7630** |  | **NEG** | **0.005535359** |
| **7631** | **Benzenesulfonic acid,fluoro-2,4-dinitro-(9CI)** | **POS** | **0.019520033** |
| **7633** |  | **NEG** | **0.032787781** |
| **7638** |  | **NEG** | **0.014548945** |
| **7639** |  | **NEG** | **0.002441129** |
| **7643** |  | **NEG** | **0.038059262** |
| **7648** |  | **NEG** | **0.013816945** |
| **7652** |  | **NEG** | **0.025090553** |
| **7654** |  | **NEG** | **0.000254598** |
| **7655** |  | **NEG** | **0.000151563** |
| **7656** | **UDP-3-ketoglucose** | **NEG** | **0.001468626** |
| **7660** | **Clioquinol glucuronide** | **NEG** | **0.028915147** |
| **7661** |  | **POS** | **0.041905117** |
| **7668** |  | **POS** | **0.003985982** |
| **7671** |  | **NEG** | **0.008367696** |
| **7675** |  | **NEG** | **0.044921304** |
| **7682** |  | **NEG** | **0.003308092** |
| **7685** |  | **POS** | **0.04672993** |
| **7686** |  | **POS** | **0.000962129** |
| **7700** |  | **NEG** | **0.03602335** |
| **7703** |  | **NEG** | **0.001495537** |
| **7706** |  | **POS** | **0.014323272** |
| **7707** |  | **POS** | **0.022396219** |
| **7708** | **Phosphoenol-4-deoxy-3-tetrulosote** | **NEG** | **0.008257406** |
| **7715** |  | **NEG** | **0.025727309** |
| **7718** |  | **NEG** | **0.004390918** |
| **7722** |  | **NEG** | **0.019257566** |
| **7725** | **9-[2-(Phosphanylmethoxy)ethyl]purin-6-amine** | **POS** | **0.017337953** |
| **7729** | **Fluoromisonidazole** | **NEG** | **0.012743039** |
| **7730** |  | **NEG** | **0.006861532** |
| **7735** |  | **NEG** | **0.014104389** |
| **7739** |  | **NEG** | **0.005843858** |
| **7740** |  | **NEG** | **0.01424458** |
| **7743** |  | **NEG** | **0.000419129** |
| **7754** | **Adefovir** | **POS** | **0.048484852** |
| **7760** |  | **NEG** | **0.027629943** |
| **7765** | **N-phosphocreatinate(2-)** | **POS** | **0.004695646** |
| **7784** | **N,N-dihydroxy-L-tyrosine** | **NEG** | **0.031154782** |
| **7790** | **Aplysil** | **NEG** | **3.12506E-06** |
| **7791** |  | **NEG** | **0.015378278** |
| **7794** |  | **NEG** | **0.00343743** |
| **7795** |  | **NEG** | **0.003618546** |
| **7796** | **1-phthaleneacetic acid sodium salt** | **POS** | **0.010068082** |
| **7801** |  | **NEG** | **0.005378137** |
| **7804** |  | **POS** | **0.010617771** |
| **7806** | **Xanthommatin** | **NEG** | **0.000514317** |
| **7811** |  | **NEG** | **0.029130929** |
| **7816** |  | **POS** | **0.034266112** |
| **7827** |  | **NEG** | **0.046174351** |
| **7829** | **3,5-Dichloro-2-hydroxybenzenesulfonic acid** | **NEG** | **0.033764307** |
| **7834** |  | **NEG** | **0.010144386** |
| **7837** |  | **NEG** | **0.012313193** |
| **7842** | **Aplysil** | **POS** | **7.78633E-05** |
| **7843** |  | **POS** | **0.032004982** |
| **7858** |  | **NEG** | **0.002442539** |
| **7859** |  | **NEG** | **0.001987223** |
| **7869** | **Arbutin 6-phosphate** | **POS** | **0.014497675** |
| **7871** |  | **POS** | **0.046022794** |
| **7872** |  | **NEG** | **0.004484904** |
| **7885** |  | **NEG** | **0.005199674** |
| **7888** | **Sodium glucoheptonate** | **NEG** | **0.001619371** |
| **7889** |  | **NEG** | **0.031041189** |
| **7890** | **n-Heptafluorobutyrylimidazole** | **NEG** | **0.038997527** |
| **7891** |  | **NEG** | **0.001115915** |
| **7904** |  | **POS** | **0.009812803** |
| **7922** | **3,5-Dinitroguaiacol** | **POS** | **0.01983059** |
| **7923** | **7,8-dihydroneopterin 3'-phosphate** | **POS** | **0.038953294** |
| **7925** |  | **NEG** | **0.00037278** |
| **7927** |  | **NEG** | **0.000508222** |
| **7928** |  | **NEG** | **0.000242964** |
| **7929** | **Carbamoyl phosphate** | **NEG** | **0.017818302** |
| **7933** | **4-(Trifluoromethyl)benzoic acid** | **NEG** | **0.000546404** |
| **7934** |  | **NEG** | **0.000377346** |
| **7935** |  | **NEG** | **0.000830466** |
| **7937** | **3,5-Dichloro-L-tyrosine** | **NEG** | **0.001726457** |
| **7939** | **Muzolimine** | **NEG** | **0.000548323** |
| **7940** |  | **NEG** | **0.000660007** |
| **7941** | **Iodobenzylguanidine** | **NEG** | **0.001663977** |
| **7942** |  | **NEG** | **0.000534311** |
| **7945** |  | **NEG** | **0.001062924** |
| **7948** | **Edtmp** | **NEG** | **0.000963337** |
| **7954** |  | **POS** | **0.032724029** |
| **7960** |  | **NEG** | **0.001701968** |
| **7961** |  | **NEG** | **0.003987301** |
| **7964** |  | **NEG** | **0.001230814** |
| **7965** |  | **NEG** | **0.047356158** |
| **7967** |  | **POS** | **0.020721175** |
| **7968** |  | **POS** | **0.025105067** |
| **7969** | **Luteolin 7-O-glucuronide** | **POS** | **0.040326718** |
| **7970** |  | **POS** | **0.029306232** |
| **7973** | **Vinclozolin** | **NEG** | **0.009122128** |
| **7974** |  | **NEG** | **0.002702734** |
| **7976** |  | **NEG** | **0.025746497** |
| **7978** |  | **NEG** | **0.020302889** |
| **7981** |  | **NEG** | **0.029225202** |
| **7984** |  | **NEG** | **0.007539818** |
| **7985** |  | **NEG** | **0.024636717** |
| **7986** |  | **NEG** | **0.00632238** |
| **7991** | **lysophosphatidylinositol** | **POS** | **0.008109185** |
| **7997** |  | **NEG** | **0.045859991** |
| **7998** | **Vertilmicin** | **NEG** | **0.041999877** |
| **8005** | **Bicarbonate carbon** | **NEG** | **0.013549661** |
| **8007** |  | **NEG** | **0.02293528** |
| **8011** |  | **NEG** | **0.000848548** |
| **8018** |  | **NEG** | **0.017742399** |
| **8020** |  | **NEG** | **0.002675724** |
| **8022** |  | **NEG** | **0.004605294** |
| **8023** | **dTDP-3,4-dioxo-2,6-dideoxy-D-glucose** | **NEG** | **0.008431165** |
| **8024** |  | **NEG** | **0.045532997** |
| **8027** |  | **NEG** | **0.01480173** |
| **8030** | **Dinofenate** | **POS** | **0.021036409** |
| **8036** |  | **NEG** | **0.01925144** |
| **8038** |  | **NEG** | **0.03838399** |
| **8041** |  | **NEG** | **0.00926598** |
| **8045** |  | **NEG** | **0.048918133** |
| **8046** |  | **NEG** | **0.040395139** |
| **8056** |  | **POS** | **0.029070106** |
| **8059** |  | **POS** | **0.001634813** |
| **8061** |  | **NEG** | **0.000661224** |
| **8065** |  | **NEG** | **0.021825991** |
| **8076** | **Bz-Camp** | **POS** | **0.000187778** |
| **8078** | **5'-Benzoylphosphoadenosine** | **POS** | **8.64087E-05** |
| **8079** | **3,4-Hexahydroxydiphenoylarabinose** | **POS** | **0.010251325** |
| **8080** | **Primisulfuron-methyl** | **POS** | **0.008386579** |
| **8081** |  | **POS** | **0.00154025** |
| **8082** | **Dicloxacillin** | **POS** | **0.001595723** |
| **8084** |  | **POS** | **0.006413121** |
| **8087** | **3,4-Difluoro-2-[(2-Fluoro-4-Iodophenyl)amino]-N-(2-Hydroxyethoxy)-5-[(3-Oxo-1,2-Oxazinan-2-Yl)methyl]benzamide** | **NEG** | **0.007403479** |
| **8092** |  | **NEG** | **0.000542399** |
| **8096** | **beta-Chloro-alpha-phenylbenzeneethamine hydrochloride** | **POS** | **0.015962962** |
| **8112** |  | **POS** | **0.001039512** |
| **8115** |  | **NEG** | **0.022247899** |
| **8135** | **Glyphosine** | **POS** | **0.00743612** |
| **8140** | **2,4-Dioxotetrahydropyrimidine D-ribonucleotide** | **NEG** | **0.0015468** |
| **8148** |  | **NEG** | **0.001033139** |
| **8149** | **GTP-gamma-S** | **NEG** | **0.008599472** |
| **8150** |  | **NEG** | **0.045565408** |
| **8152** |  | **NEG** | **0.009108812** |
| **8153** |  | **NEG** | **0.025220513** |
| **8154** | **2-(alpha-D-Mannosyl)-3-phosphoglycerate** | **POS** | **0.029114114** |
| **8162** |  | **NEG** | **0.046050619** |
| **8170** |  | **NEG** | **0.002339444** |
| **8178** |  | **POS** | **0.020973815** |
| **8183** |  | **POS** | **0.035709992** |
| **8184** | **4'-Hydroxy Aceclofenac** | **POS** | **0.006242014** |
| **8185** |  | **NEG** | **0.029224063** |
| **8186** | **Succinyl chloride** | **POS** | **1.83561E-07** |
| **8188** |  | **POS** | **0.020156068** |
| **8194** |  | **NEG** | **0.034122239** |
| **8197** |  | **POS** | **0.036084539** |
| **8198** |  | **NEG** | **0.011776183** |
| **8199** | **Sevoflurane** | **NEG** | **0.033700422** |
| **8200** |  | **NEG** | **0.007014434** |
| **8203** | **Potassium dichromate** | **NEG** | **0.001511616** |
| **8204** |  | **NEG** | **0.022364471** |
| **8208** | **TG(16:0/16:0/16:0)** | **NEG** | **0.015444313** |
| **8209** | **SM(d18:1/25:0)** | **NEG** | **0.01470971** |
| **8212** |  | **NEG** | **0.020331892** |
| **8213** |  | **NEG** | **0.00107729** |
| **8230** |  | **NEG** | **0.019751949** |
| **8236** | **Ellagic acid** | **NEG** | **0.009151563** |
| **8242** |  | **NEG** | **0.01191771** |
| **8243** |  | **POS** | **0.030373389** |
| **8245** |  | **POS** | **0.012378235** |
| **8256** |  | **POS** | **0.014164701** |
| **8258** | **UDP** | **POS** | **0.032913979** |
| **8259** | **TG(16:0/16:0/16:0)** | **POS** | **0.010792881** |
| **8266** |  | **POS** | **0.013269237** |
| **8269** |  | **NEG** | **0.043331048** |
| **8273** |  | **POS** | **0.035497182** |
| **8275** | **Nitrefazole** | **POS** | **0.013601963** |
| **8276** | **mepitiostane** | **POS** | **0.027460452** |
| **8277** |  | **NEG** | **0.02619198** |
| **8278** |  | **NEG** | **0.042147697** |
| **8283** | **Sodium methallylsulfote** | **POS** | **0.023939161** |
| **8285** | **6-Deoxy-6-sulfo-D-fructose 1-phosphate** | **NEG** | **0.007195316** |
| **8289** |  | **NEG** | **0.027492828** |
| **8293** |  | **POS** | **0.012507566** |
| **8294** | **Oxoguanine** | **POS** | **0.024749753** |
| **8305** |  | **POS** | **0.001745714** |
| **8306** | **Calcium propiote** | **POS** | **0.000337659** |
| **8307** |  | **POS** | **0.044023751** |
| **8313** |  | **POS** | **0.000861537** |
| **8314** | **(+)-(3S,4R)-cis-3,4-Dihydroxy-3,4-dihydrofluorene** | **POS** | **0.000249852** |
| **8316** | **Pelargonidin** | **POS** | **0.011900956** |
| **8320** | **3-hydroxyguanfacine glucuronide** | **NEG** | **0.015423066** |
| **8327** |  | **POS** | **0.02441909** |
| **8329** | **UDP-L-Ara4N** | **POS** | **0.016227017** |
| **8330** |  | **NEG** | **0.000622517** |
| **8331** |  | **NEG** | **0.041251216** |
| **8336** | **Sanazole** | **POS** | **0.003779135** |
| **8343** |  | **NEG** | **0.005788536** |
| **8344** |  | **NEG** | **0.019944139** |
| **8346** |  | **POS** | **0.015757396** |
| **8348** | **ringenin** | **POS** | **0.003651314** |
| **8349** | **2,6-Dichlorophenol-4-(1,4-phthoquinone imine)** | **POS** | **0.010866569** |
| **8354** |  | **NEG** | **6.86517E-05** |
| **8355** |  | **POS** | **0.002816847** |
| **8357** |  | **NEG** | **0.000784545** |
| **8359** |  | **NEG** | **0.001042157** |
| **8361** | **2-Amino-1,2-bis(p-chlorophenyl)ethanol** | **NEG** | **1.93435E-06** |
| **8362** |  | **NEG** | **8.15604E-06** |
| **8363** | **CGH 2466** | **POS** | **0.008743522** |
| **8364** | **3',5'-Cyclic GMP** | **POS** | **0.046490392** |
| **8367** | **Etacozole** | **NEG** | **0.006691183** |
| **8369** | **Triaziquone** | **POS** | **5.902E-05** |
| **8382** | **Phosphoaminophosphonic acid-guanylate ester** | **NEG** | **0.00540655** |
| **8383** |  | **NEG** | **0.014350546** |
| **8385** |  | **NEG** | **0.012610798** |
| **8393** | **2-Amino-1,2-bis(p-chlorophenyl)ethanol** | **POS** | **0.000207798** |
| **8396** |  | **POS** | **0.002470527** |
| **8400** | **Flurochloridone** | **NEG** | **0.004432473** |
| **8402** |  | **NEG** | **0.031236343** |
| **8404** | **N-Hydroxy-MeIQx** | **POS** | **0.000364245** |
| **8405** | **Calcium hydroxide** | **POS** | **0.006383188** |
| **8407** | **Asulam** | **POS** | **0.000391891** |
| **8408** |  | **POS** | **0.01025267** |
| **8411** |  | **POS** | **0.010132236** |
| **8413** |  | **POS** | **0.040248321** |
| **8418** |  | **NEG** | **0.000689665** |
| **8422** | **Palygorskite** | **NEG** | **0.011009652** |
| **8424** |  | **NEG** | **0.002982764** |
| **8428** | **Lamivudine** | **POS** | **0.02199846** |
| **8435** | **Methyl (2-propenylthio) selenide** | **POS** | **0.001310222** |
| **8440** |  | **NEG** | **0.031810322** |
| **8444** |  | **POS** | **6.89446E-05** |
| **8451** |  | **NEG** | **0.031848035** |
| **8457** |  | **NEG** | **0.011815461** |
| **8458** | **Methyclothiazide** | **NEG** | **0.008079601** |
| **8459** |  | **POS** | **0.000529955** |
| **8461** |  | **NEG** | **0.045870035** |
| **8465** | **Pencozole** | **NEG** | **0.014864817** |
| **8472** |  | **POS** | **0.007842134** |
| **8477** | **Cryolite** | **NEG** | **0.044434021** |
| **8484** |  | **POS** | **0.000497456** |
| **8495** |  | **POS** | **0.013813144** |
| **8496** | **Flunixin** | **POS** | **0.000370137** |
| **8498** |  | **POS** | **0.044583** |
| **8500** | **3,4-Dihydroxymandelate** | **NEG** | **0.040229196** |
| **8505** |  | **NEG** | **0.0228171** |
| **8507** | **Tolcapone** | **POS** | **0.002601121** |
| **8508** | **Hhcfu** | **POS** | **0.000733047** |
| **8512** | **Phloretin** | **POS** | **0.000606862** |
| **8513** | **L-Tyrosine methyl ester 4-sulfate** | **POS** | **0.000874579** |
| **8514** |  | **POS** | **0.0012741** |
| **8515** | **Norsanguinarine** | **POS** | **1.26352E-05** |
| **8516** | **fluvoxamino acid** | **POS** | **1.64675E-05** |
| **8517** | **4-Amino-5-hydroxy-2,7-naphthalenedisulfonic acid** | **POS** | **3.15792E-07** |
| **8518** |  | **POS** | **2.01275E-05** |
| **8520** |  | **POS** | **0.000114623** |
| **8522** |  | **POS** | **0.001880649** |
| **8523** |  | **POS** | **0.001574651** |
| **8524** |  | **POS** | **3.08037E-05** |
| **8528** | **1-(3-Fluoro-4-hydroxy-5-mercaptomethyltetrahydrofuran-2-yl)-5-methylpyrimidine-2,4(1H,3H)-dione** | **POS** | **0.000486387** |
| **8534** | **TG(24:0/24:1(15Z)/O-18:0)** | **POS** | **0.040360114** |
| **8546** |  | **POS** | **0.000319631** |
| **8547** |  | **POS** | **1.89596E-05** |
| **8549** | **Antirrhinoside** | **POS** | **0.005148342** |
| **8551** |  | **POS** | **0.00192905** |
| **8558** |  | **NEG** | **0.029923301** |
| **8559** | **UDP-D-xylose** | **NEG** | **0.006165413** |
| **8562** |  | **NEG** | **0.003306156** |
| **8565** |  | **POS** | **0.023512974** |
| **8573** | **3-oxobrimonidine** | **POS** | **0.025768711** |
| **8576** |  | **POS** | **0.0044241** |
| **8581** |  | **NEG** | **0.001389684** |
| **8590** |  | **NEG** | **0.000433512** |
| **8597** |  | **NEG** | **0.033438178** |
| **8600** |  | **POS** | **0.001021628** |
| **8602** |  | **POS** | **0.031295722** |
| **8605** |  | **NEG** | **0.021353256** |
| **8610** | **(R)-5-Phosphomevalote** | **NEG** | **0.025581045** |
| **8613** | **4',6-Dichloroflavan** | **NEG** | **0.046241968** |
| **8615** | **2-Dehydro-3-deoxy-D-arabino-heptote 7-phosphate** | **NEG** | **0.001666998** |
| **8632** |  | **NEG** | **0.014980944** |
| **8653** | **IDP** | **NEG** | **0.042047735** |
| **8655** |  | **NEG** | **0.040268566** |
| **8658** |  | **POS** | **0.014240033** |
| **8659** |  | **POS** | **0.03813525** |
| **8678** |  | **NEG** | **0.025763312** |
| **8685** |  | **NEG** | **0.016597126** |
| **8695** |  | **POS** | **0.013608874** |
| **8700** |  | **POS** | **0.002859846** |
| **8704** | **Tienilic acid** | **NEG** | **0.00883817** |
| **8711** |  | **NEG** | **0.0224203** |
| **8717** |  | **POS** | **0.030489847** |
| **8720** | **3,5-Dinitroguaiacol** | **POS** | **0.02564345** |
| **8721** | **sn-Glycero-3-phosphoethanolamine** | **POS** | **0.037836847** |
| **8723** | **Benzoyl meso-tartaric acid** | **POS** | **0.020932388** |
| **8727** | **PIP2(16:0/22:4(10Z,13Z,16Z,19Z))** | **POS** | **0.000833568** |
| **8737** |  | **NEG** | **0.030673956** |
| **8740** |  | **NEG** | **0.046813121** |
| **8742** |  | **NEG** | **0.010827962** |
| **8745** |  | **NEG** | **0.00336897** |
| **8748** |  | **POS** | **0.041009742** |
| **8754** |  | **NEG** | **0.031201986** |
| **8768** |  | **POS** | **0.039093049** |
| **8774** |  | **POS** | **0.028623678** |
| **8775** |  | **POS** | **0.018391467** |
| **8786** | **Adenosine 5-O-(3-thiotriphophate)** | **NEG** | **0.023420328** |
| **8793** | **2,8-bis-Trifluoromethyl-4-quinoline carboxylic acid** | **NEG** | **0.004707825** |
| **8800** |  | **POS** | **0.006204319** |
| **8807** | **Adenosine 5-O-(3-thiotriphophate)** | **POS** | **0.002883542** |
| **8814** |  | **NEG** | **0.001609042** |
| **8819** | **6-(Dibromomethylene)-17beta-hydroxy-androst-4-en-3-one propiote** | **NEG** | **0.010182501** |
| **8820** |  | **NEG** | **7.4955E-05** |
| **8821** |  | **NEG** | **0.0001008** |
| **8822** | **TG(14:1(9Z)/18:4(6Z,9Z,12Z,15Z)/O-18:0)** | **NEG** | **0.011968079** |
| **8823** | **5-Hydroxyferulic acid methyl ester** | **POS** | **0.015206227** |
| **8824** | **Clorgyline** | **POS** | **0.036270576** |
| **8826** | **Iron naphthenate** | **NEG** | **0.041135759** |
| **8827** | **5alpha-Cholestan-5alpha,6beta-diol** | **NEG** | **0.002936348** |
| **8828** |  | **NEG** | **0.001233394** |
| **8830** | **6-Phospho-D-glucote** | **POS** | **0.002107336** |
| **8839** |  | **NEG** | **0.000584596** |
| **8849** | **2-Maleylacetate** | **POS** | **0.01440285** |
| **8853** |  | **POS** | **0.024828821** |
| **8855** | **5alpha-Cholestan-5alpha,6beta-diol** | **POS** | **7.55748E-05** |
| **8856** |  | **POS** | **0.000341326** |
| **8857** |  | **POS** | **0.004597866** |
| **8858** | **4-Amino-5-hydroxymethyl-2-methylpyrimidine diphosphate** | **NEG** | **8.11209E-05** |
| **8861** |  | **NEG** | **0.047511543** |
| **8863** |  | **POS** | **0.020632715** |
| **8868** |  | **NEG** | **0.029019278** |
| **8871** |  | **NEG** | **0.000459637** |
| **8872** | **Barbiturate** | **NEG** | **0.002839708** |
| **8873** |  | **NEG** | **0.001441259** |
| **8875** |  | **POS** | **6.68678E-05** |
| **8877** |  | **POS** | **0.000158586** |
| **8878** |  | **POS** | **0.000743864** |
| **8879** |  | **POS** | **1.32614E-05** |
| **8880** | **4-Hydroxylamino-2,6-dinitrotoluene** | **NEG** | **0.012720605** |
| **8882** |  | **NEG** | **0.003449586** |
| **8883** | **Chlomethoxyfen** | **NEG** | **0.003041928** |
| **8884** |  | **NEG** | **0.011547232** |
| **8887** |  | **POS** | **0.048855757** |
| **8888** |  | **POS** | **0.000130845** |
| **8889** |  | **NEG** | **0.03458673** |
| **8894** | **ZATOSETRON** | **NEG** | **0.012271298** |
| **8897** | **TG(14:0/20:1(11Z)/14:0)** | **NEG** | **0.004553463** |
| **8902** |  | **POS** | **0.00132575** |
| **8905** | **5-Hydroxyisourate** | **POS** | **0.001674437** |
| **8907** |  | **POS** | **0.019403822** |
| **8909** |  | **POS** | **0.004430777** |
| **8912** |  | **POS** | **0.029553533** |
| **8914** |  | **POS** | **0.049483637** |
| **8924** |  | **NEG** | **0.000721914** |
| **8933** | **4-Maleylacetoacetate** | **NEG** | **0.016986168** |
| **8935** |  | **POS** | **0.000741782** |
| **8941** | **Nav1.7 blocker 24** | **NEG** | **0.005811336** |
| **8943** |  | **POS** | **0.008327417** |
| **8944** |  | **POS** | **0.004157266** |
| **8945** |  | **POS** | **0.041920566** |
| **8947** |  | **POS** | **0.000790038** |
| **8948** |  | **POS** | **0.001481692** |
| **8951** |  | **POS** | **0.011553875** |
| **8963** |  | **NEG** | **7.76741E-08** |
| **8970** |  | **NEG** | **0.001009508** |
| **8972** | **D-Erythrose 4-phosphate** | **NEG** | **0.025474991** |
| **8979** | **CDP-4-dehydro-3,6-dideoxy-D-glucose** | **POS** | **0.016662724** |
| **8986** |  | **NEG** | **0.000507321** |
| **8987** |  | **NEG** | **0.000249372** |
| **8988** |  | **POS** | **9.04933E-05** |
| **8992** | **CMP-2-aminoethylphosphote** | **NEG** | **0.002012094** |
| **8993** |  | **NEG** | **4.47671E-05** |
| **8995** |  | **POS** | **0.019929177** |
| **8999** |  | **POS** | **0.003203981** |
| **9000** | **SQ 26180** | **POS** | **0.030862744** |
| **9006** |  | **POS** | **0.031562853** |
| **9010** |  | **NEG** | **0.001149133** |
| **9012** |  | **NEG** | **0.01169667** |
| **9016** |  | **NEG** | **0.000107589** |
| **9017** |  | **NEG** | **0.012257833** |
| **9019** |  | **NEG** | **0.012183597** |
| **9020** |  | **NEG** | **0.008718383** |
| **9022** |  | **NEG** | **0.012222762** |
| **9024** |  | **NEG** | **0.00028585** |
| **9032** | **5-Iodotubercidin** | **NEG** | **0.002299544** |
| **9035** |  | **POS** | **0.000941138** |
| **9045** |  | **NEG** | **0.044021636** |
| **9048** |  | **NEG** | **0.004141908** |
| **9049** |  | **POS** | **0.000957217** |
| **9050** |  | **POS** | **0.004690418** |
| **9055** | **Incadronic acid** | **POS** | **0.014346599** |
| **9056** |  | **POS** | **0.02420177** |
| **9066** | **Bis(glycerophospho)-glycerol** | **NEG** | **0.033893383** |
| **9070** |  | **NEG** | **0.049532361** |
| **9071** |  | **NEG** | **0.026108806** |
| **9072** |  | **NEG** | **0.0086165** |
| **9075** |  | **POS** | **0.000865581** |
| **9083** |  | **POS** | **0.022244507** |
| **9093** |  | **NEG** | **0.031912942** |
| **9097** |  | **NEG** | **0.01476848** |
| **9100** |  | **NEG** | **0.019472358** |
| **9105** |  | **NEG** | **0.046632651** |
| **9108** |  | **POS** | **0.014020873** |
| **9110** |  | **POS** | **0.030100334** |
| **9112** |  | **NEG** | **0.014436833** |
| **9121** |  | **NEG** | **0.036471429** |
| **9122** |  | **NEG** | **0.000321591** |
| **9124** | **Dinitramine** | **POS** | **0.0020275** |
| **9126** |  | **POS** | **0.039951377** |
| **9132** |  | **NEG** | **0.037755042** |
| **9134** |  | **NEG** | **0.015484273** |
| **9136** |  | **NEG** | **0.009520208** |
| **9137** |  | **NEG** | **0.047646803** |
| **9144** |  | **NEG** | **0.000330813** |
| **9145** |  | **NEG** | **0.000434311** |
| **9149** | **Blue pigment** | **NEG** | **0.037706177** |
| **9157** |  | **NEG** | **0.0001039** |
| **9166** |  | **NEG** | **0.000681607** |
| **9168** |  | **NEG** | **0.0053487** |
| **9169** | **ADP ribose 1'',2''-cyclic phosphate** | **NEG** | **0.009567755** |
| **9170** |  | **NEG** | **0.000295197** |
| **9172** | **p-Benzoquinone** | **POS** | **0.002898069** |
| **9173** |  | **POS** | **0.001237756** |
| **9178** |  | **POS** | **3.6587E-05** |
| **9179** |  | **POS** | **1.05648E-05** |
| **9182** |  | **NEG** | **0.00390513** |
| **9183** |  | **NEG** | **0.00079693** |
| **9186** |  | **NEG** | **0.037543286** |
| **9190** |  | **POS** | **0.001497867** |
| **9192** |  | **NEG** | **0.00503814** |
| **9195** | **Propyzamide** | **NEG** | **0.009913332** |
| **9198** |  | **NEG** | **0.002648668** |
| **9201** | **Endothal-disodium** | **POS** | **0.007219294** |
| **9206** |  | **POS** | **0.000396474** |
| **9207** |  | **POS** | **0.000374527** |
| **9213** |  | **NEG** | **0.005527634** |
| **9215** |  | **NEG** | **0.03179771** |
| **9218** |  | **NEG** | **0.009246338** |
| **9219** |  | **NEG** | **9.90312E-06** |
| **9223** |  | **NEG** | **0.008556584** |
| **9224** |  | **NEG** | **0.000401022** |
| **9225** |  | **NEG** | **0.000700029** |
| **9228** |  | **POS** | **0.002693963** |
| **9235** |  | **NEG** | **0.004415472** |
| **9238** | **Chenodeoxycholate** | **NEG** | **0.01226509** |
| **9239** |  | **NEG** | **0.020606109** |
| **9241** |  | **NEG** | **4.81627E-05** |
| **9243** | **Isoflurophate** | **POS** | **0.009459036** |
| **9248** | **Cycloguanil hydrochloride** | **POS** | **0.033699293** |
| **9250** |  | **POS** | **0.001214245** |
| **9260** |  | **NEG** | **0.015868794** |
| **9261** |  | **NEG** | **0.000238599** |
| **9262** |  | **NEG** | **0.002421749** |
| **9269** |  | **NEG** | **0.004240049** |
| **9273** |  | **POS** | **0.00027871** |
| **9274** |  | **POS** | **0.009834019** |
| **9280** |  | **POS** | **0.00148635** |
| **9295** | **D-Glycerate** | **NEG** | **2.23477E-05** |
| **9297** |  | **NEG** | **0.001352783** |
| **9301** |  | **NEG** | **0.040769336** |
| **9303** |  | **NEG** | **0.043202392** |
| **9311** |  | **NEG** | **0.004942791** |
| **9312** |  | **NEG** | **0.044268684** |
| **9328** |  | **POS** | **0.00062707** |
| **9329** |  | **POS** | **0.001803823** |
| **9330** |  | **POS** | **0.015600464** |
| **9335** |  | **NEG** | **0.010231734** |
| **9339** |  | **NEG** | **0.003852667** |
| **9341** | **Indoleglycerol phosphate** | **NEG** | **0.001756211** |
| **9343** | **4-(beta-D-Ribofuranosyl)aniline 5'-phosphate** | **NEG** | **0.000797286** |
| **9346** | **Bis(glycerophospho)-glycerol** | **NEG** | **0.009917732** |
| **9357** |  | **POS** | **0.04631722** |
| **9377** |  | **NEG** | **0.0290208** |
| **9380** |  | **NEG** | **0.003915601** |
| **9381** |  | **POS** | **0.00259005** |
| **9386** |  | **NEG** | **0.017553637** |
| **9391** |  | **NEG** | **0.012128562** |
| **9402** |  | **NEG** | **0.008198753** |
| **9411** |  | **NEG** | **0.000236847** |
| **9413** |  | **NEG** | **0.015427547** |
| **9417** |  | **POS** | **0.021400803** |
| **9434** |  | **NEG** | **0.006191769** |
| **9440** |  | **NEG** | **0.004435421** |
| **9446** |  | **NEG** | **0.000364896** |
| **9455** |  | **NEG** | **0.002600922** |
| **9457** |  | **POS** | **0.021974234** |
| **9458** |  | **NEG** | **1.15279E-08** |
| **9461** | **SM(d18:1/22:1(13Z))** | **NEG** | **0.006095785** |
| **9462** |  | **POS** | **0.001440326** |
| **9468** |  | **POS** | **0.013357089** |
| **9469** |  | **POS** | **0.015782848** |
| **9470** | **TG(24:0/24:1(15Z)/O-18:0)** | **POS** | **0.019435401** |
| **9475** | **Isoxapyrifop** | **POS** | **0.018417983** |
| **9476** |  | **POS** | **0.02646733** |
| **9483** |  | **POS** | **0.030319551** |
| **9486** |  | **POS** | **0.009371774** |
| **9490** |  | **NEG** | **0.048192182** |
| **9495** |  | **NEG** | **0.03698439** |
| **9503** |  | **NEG** | **0.021293329** |
| **9505** |  | **NEG** | **0.000286422** |
| **9508** | **1-phthaleneacetic acid sodium salt** | **POS** | **0.001147811** |
| **9523** |  | **NEG** | **0.000442491** |
| **9524** |  | **NEG** | **0.00201885** |
| **9532** | **Dihydroneopterin phosphate** | **POS** | **0.024442148** |
| **9537** |  | **POS** | **0.028655031** |
| **9552** | **2-Furylmercury chloride** | **NEG** | **0.001022599** |
| **9553** |  | **NEG** | **0.049034316** |
| **9559** |  | **NEG** | **0.002701228** |
| **9560** |  | **NEG** | **0.01559403** |
| **9565** | **sn-Glycero-3-phospho-1-inositol** | **POS** | **0.014910085** |
| **9570** |  | **POS** | **0.009599683** |
| **9572** | **3,4,3',4'-Tetrachlorobiphenyl** | **NEG** | **0.000409103** |
| **9573** |  | **NEG** | **0.030412644** |
| **9574** |  | **NEG** | **0.019507964** |
| **9578** |  | **POS** | **0.000994198** |
| **9579** |  | **NEG** | **0.000234729** |
| **9581** |  | **POS** | **0.013980675** |
| **9597** |  | **POS** | **0.001759741** |
| **9598** |  | **POS** | **0.003971464** |
| **9600** | **Ethacrynic acid** | **NEG** | **0.000119597** |
| **9601** |  | **POS** | **0.01483512** |
| **9606** |  | **POS** | **0.003774852** |
| **9610** |  | **POS** | **0.014374099** |
| **9611** |  | **POS** | **0.034766675** |
| **9612** |  | **POS** | **0.00011446** |
| **9613** |  | **POS** | **0.000445129** |
| **9625** |  | **NEG** | **0.045347297** |
| **9626** |  | **NEG** | **0.000396196** |
| **9631** |  | **NEG** | **0.007948005** |
| **9632** |  | **NEG** | **0.035879318** |
| **9633** |  | **POS** | **0.038887616** |
| **9634** |  | **POS** | **0.043463778** |
| **9635** |  | **NEG** | **0.010474247** |
| **9644** |  | **NEG** | **0.00013624** |
| **9645** |  | **POS** | **0.010370137** |
| **9668** |  | **POS** | **0.021798958** |
| **9669** | **6-Phospho-2-dehydro-D-glucote** | **POS** | **0.043706202** |
| **9674** |  | **POS** | **0.007219734** |
| **9675** | **Dicrotophos** | **POS** | **0.029237978** |
| **9676** |  | **POS** | **0.007894323** |
| **9677** |  | **POS** | **0.032962928** |
| **9680** |  | **POS** | **0.048963894** |
| **9682** | **Tulobuterol hydrochloride** | **POS** | **0.025071963** |
| **9683** |  | **POS** | **0.016493818** |
| **9684** | **M1** | **POS** | **0.0206464** |
| **9687** |  | **NEG** | **0.014608951** |
| **9690** |  | **NEG** | **0.048186157** |
| **9700** |  | **NEG** | **0.015235703** |
| **9701** |  | **NEG** | **0.002135005** |
| **9707** |  | **NEG** | **0.045693364** |
| **9708** |  | **NEG** | **0.042254012** |
| **9709** |  | **NEG** | **0.000317961** |
| **9711** |  | **NEG** | **0.003619538** |
| **9713** |  | **NEG** | **0.01883582** |
| **9722** |  | **POS** | **0.009644301** |
| **9725** |  | **POS** | **0.038989516** |
| **9737** |  | **POS** | **0.007476741** |
| **9739** |  | **POS** | **0.030515606** |
| **9741** |  | **POS** | **0.019071576** |
| **9744** | **4,4'-Dichlorodiphenyl sulfone** | **NEG** | **0.049867535** |
| **9748** |  | **NEG** | **0.039958814** |
| **9751** | **CMP-2-aminoethylphosphote** | **NEG** | **0.001162904** |
| **9752** |  | **NEG** | **0.021687537** |
| **9760** |  | **NEG** | **0.007762096** |
| **9764** |  | **POS** | **0.024079117** |
| **9765** | **Calcium hydroxide** | **POS** | **0.021352909** |
| **9769** |  | **NEG** | **0.016794434** |
| **9770** |  | **POS** | **0.007510892** |
| **9776** |  | **POS** | **0.003939931** |
| **9777** |  | **POS** | **0.012786308** |
| **9779** |  | **NEG** | **0.041480658** |
| **9780** |  | **NEG** | **0.00121045** |
| **9789** |  | **NEG** | **0.000335182** |
| **9793** |  | **POS** | **0.026023744** |
| **9794** |  | **POS** | **0.003109889** |
| **9796** | **Apraclonidine** | **POS** | **0.033386172** |
| **9800** |  | **NEG** | **0.000713522** |
| **9801** |  | **NEG** | **0.000223793** |
| **9806** |  | **POS** | **0.041091651** |
| **9810** |  | **POS** | **0.000101355** |
| **9811** |  | **POS** | **0.002160745** |
| **9812** |  | **POS** | **0.017959167** |
| **9828** |  | **NEG** | **0.000335233** |
| **9835** |  | **NEG** | **0.003993257** |
| **9839** |  | **POS** | **0.04467486** |
| **9851** | **beta-Chloro-alpha-phenylbenzeneethamine hydrochloride** | **POS** | **0.035635295** |
| **9853** |  | **POS** | **0.01099898** |
| **9854** |  | **POS** | **0.010101595** |
| **9856** |  | **POS** | **0.013425727** |
| **9872** |  | **NEG** | **0.020266873** |
| **9873** |  | **NEG** | **0.003928823** |
| **9875** |  | **POS** | **0.002596641** |
| **9883** |  | **POS** | **0.039930924** |
| **9884** | **Lecanoric acid** | **POS** | **2.73171E-05** |
| **9889** |  | **POS** | **0.00584895** |
| **9892** |  | **NEG** | **0.00038938** |
| **9894** | **Fludara** | **NEG** | **0.03689668** |
| **9900** |  | **NEG** | **0.020387069** |
| **9901** |  | **NEG** | **0.019351141** |
| **9902** |  | **NEG** | **0.017649056** |
| **9903** |  | **NEG** | **0.012890755** |
| **9905** |  | **POS** | **0.044818978** |
| **9906** |  | **NEG** | **0.031226345** |
| **9907** |  | **POS** | **0.003991331** |
| **9908** | **2-Thiohydantoin** | **POS** | **0.000831624** |
| **9909** |  | **POS** | **0.018388845** |
| **9920** |  | **POS** | **0.013139077** |
| **9923** |  | **POS** | **0.025064547** |
| **9926** |  | **POS** | **0.011101251** |
| **9930** |  | **POS** | **0.002510454** |
| **9932** | **2-Oxoglutarate** | **NEG** | **0.018858547** |
| **9939** |  | **NEG** | **4.45406E-05** |
| **9941** | **Creatinine nitrite nitrate** | **NEG** | **0.000129843** |
| **9942** |  | **NEG** | **0.024746798** |
| **9948** |  | **NEG** | **0.000419249** |
| **9951** |  | **NEG** | **0.012745795** |
| **9954** |  | **NEG** | **0.004396045** |
| **9956** | **Dracorubin** | **NEG** | **0.000163579** |
| **9957** |  | **NEG** | **0.001325475** |
| **9958** |  | **NEG** | **0.038107379** |
| **9963** | **CMP-2-aminoethylphosphote** | **POS** | **0.001056117** |
| **9970** | **CDP** | **NEG** | **0.000498249** |
| **9973** |  | **POS** | **0.005627904** |
| **9975** | **Creatinine nitrite nitrate** | **POS** | **0.000235743** |
| **9976** |  | **POS** | **0.012192245** |
| **9978** | **Petunidin** | **POS** | **1.06251E-05** |
| **9982** |  | **POS** | **0.000689976** |
| **9985** |  | **NEG** | **0.013061545** |
| **9988** |  | **NEG** | **0.000104812** |
| **9994** | **Chlorphenacil** | **NEG** | **0.017112477** |
| **9996** |  | **NEG** | **0.01676285** |
| **9997** | **dTDP** | **NEG** | **0.017796761** |
| **9998** |  | **NEG** | **0.034226086** |
| **9999** |  | **NEG** | **0.022615928** |
| **10003** |  | **NEG** | **0.048351255** |
| **10005** |  | **NEG** | **0.010981237** |
| **10006** |  | **NEG** | **0.026321559** |
| **10007** |  | **NEG** | **0.042855146** |
| **10008** |  | **NEG** | **0.030852583** |
| **10014** |  | **POS** | **0.003345552** |
| **10015** | **2-(2-carboxy-4-methylthiazol-5-yl)ethyl phosphate** | **POS** | **0.004434034** |
| **10016** |  | **POS** | **0.004291753** |
| **10017** |  | **POS** | **0.007916564** |
| **10023** |  | **POS** | **0.019897778** |
| **10025** |  | **POS** | **0.005136018** |
| **10026** |  | **POS** | **0.000174515** |
| **10031** |  | **POS** | **0.000726361** |
| **10038** | **Ferrous lactate** | **NEG** | **0.029904842** |
| **10039** |  | **NEG** | **7.45717E-05** |
| **10042** | **3,4-Bis(7-chloroindol-3-yl)pyrrole-2,5-dicarboxylate** | **NEG** | **0.028183181** |
| **10044** |  | **NEG** | **0.024428255** |
| **10050** |  | **NEG** | **0.044029323** |
| **10051** |  | **NEG** | **0.024068942** |
| **10056** |  | **NEG** | **0.006555967** |
| **10066** |  | **NEG** | **0.031159306** |
| **10071** |  | **POS** | **0.021672632** |
| **10072** |  | **POS** | **0.033861013** |
| **10073** |  | **POS** | **0.039124176** |
| **10076** |  | **POS** | **0.002127976** |
| **10079** |  | **POS** | **0.049554259** |
| **10081** |  | **POS** | **0.000281177** |
| **10083** | **Oxoguanine** | **POS** | **0.001414454** |
| **10100** |  | **NEG** | **0.006303587** |
| **10101** |  | **NEG** | **0.019339228** |
| **10103** |  | **NEG** | **0.021401696** |
| **10105** |  | **NEG** | **0.019303693** |
| **10113** |  | **NEG** | **0.025921005** |
| **10116** |  | **NEG** | **0.005772645** |
| **10136** | **2-(Phosphonomethyl)pentanedioic acid** | **NEG** | **0.00919843** |
| **10142** |  | **NEG** | **0.037904435** |
| **10143** |  | **NEG** | **0.039133375** |
| **10151** |  | **NEG** | **0.000643758** |
| **10152** |  | **POS** | **0.008667499** |
| **10154** |  | **POS** | **0.021998015** |
| **10156** |  | **POS** | **0.002943682** |
| **10158** |  | **POS** | **0.006664658** |
| **10160** |  | **NEG** | **0.010559144** |
| **10171** | **4-Amino-2-methyl-5-(phosphooxymethyl)pyrimidine** | **NEG** | **0.021798518** |
| **10175** |  | **NEG** | **0.009809134** |
| **10176** |  | **NEG** | **0.000773223** |
| **10182** |  | **NEG** | **0.029077752** |
| **10183** |  | **NEG** | **0.021438489** |
| **10185** |  | **NEG** | **0.006824812** |
| **10186** |  | **NEG** | **0.018758362** |
| **10188** | **Quercetin 3-O-beta-D-glucosyl-(1->2)-beta-D-glucosyl-(1->2)-beta-D-glucoside** | **NEG** | **0.008129123** |
| **10195** |  | **POS** | **0.000405585** |
| **10203** |  | **NEG** | **0.01049097** |
| **10206** |  | **NEG** | **0.036151709** |
| **10208** | **1-(5-Phospho-D-ribosyl)-ATP** | **NEG** | **0.000579732** |
| **10209** |  | **POS** | **5.18579E-05** |
| **10211** |  | **POS** | **0.028300856** |
| **10213** |  | **NEG** | **0.003460973** |
| **10215** | **Isosorbide dinitrate** | **NEG** | **0.012963343** |
| **10216** | **Pentaerythritol tetranitrate** | **NEG** | **0.012294295** |
| **10223** |  | **NEG** | **1.60076E-05** |
| **10225** |  | **POS** | **0.018174352** |
| **10226** |  | **POS** | **0.026004457** |
| **10227** |  | **POS** | **0.001087186** |
| **10231** | **1-Cyano-N-[4-(trifluoromethoxy)phenyl]formohydrazide** | **POS** | **0.002110223** |
| **10232** | **D-Mannitol 1-phosphate** | **POS** | **0.039346186** |
| **10233** |  | **POS** | **0.025010022** |
| **10236** |  | **POS** | **0.000412598** |
| **10237** |  | **POS** | **0.000219578** |
| **10238** | **Imazalil nitrate** | **POS** | **0.034826898** |
| **10239** | **Phosphoenolpyruvate** | **NEG** | **0.043060921** |
| **10242** | **Glycerophosphoglycerol** | **NEG** | **0.016224304** |
| **10246** |  | **NEG** | **0.000511102** |
| **10250** |  | **NEG** | **1.25759E-05** |
| **10255** |  | **NEG** | **0.014489844** |
| **10262** |  | **NEG** | **0.005046291** |
| **10263** | **PA(18:1(11Z)/6 keto-PGF1alpha)** | **NEG** | **0.031778908** |
| **10264** | **TG(14:1(9Z)/16:1(9Z)/O-18:0)** | **NEG** | **0.007089923** |
| **10265** | **D-Erythrose 4-phosphate** | **NEG** | **0.034512185** |
| **10268** | **3-Iodo-2-propynyl butylcarbamate** | **NEG** | **0.004005569** |
| **10270** |  | **NEG** | **3.28683E-05** |
| **10272** |  | **NEG** | **0.004665642** |
| **10276** |  | **NEG** | **0.036962462** |
| **10278** |  | **NEG** | **0.027254213** |
| **10279** |  | **NEG** | **0.001472647** |
| **10281** | **Citrate** | **POS** | **0.016534692** |
| **10289** |  | **POS** | **0.005478147** |
| **10290** |  | **POS** | **0.001356954** |
| **10291** |  | **POS** | **0.018616069** |
| **10295** |  | **POS** | **0.003198306** |
| **10297** |  | **NEG** | **6.54999E-05** |
| **10298** | **3-Iodo-2-propynyl butylcarbamate** | **POS** | **0.020044649** |
| **10301** |  | **POS** | **0.009186847** |
| **10304** |  | **NEG** | **0.012523249** |
| **10306** |  | **NEG** | **0.045464599** |
| **10312** |  | **NEG** | **0.013894702** |
| **10315** |  | **NEG** | **0.003972097** |
| **10320** |  | **NEG** | **0.039860505** |
| **10324** | **Phosphovanillin** | **NEG** | **0.025825478** |
| **10325** |  | **NEG** | **0.011849234** |
| **10333** | **Pyrrolnitrin** | **NEG** | **0.010222076** |
| **10339** |  | **NEG** | **0.037951116** |
| **10340** |  | **NEG** | **0.045384169** |
| **10346** |  | **NEG** | **0.007092935** |
| **10348** |  | **NEG** | **0.023445565** |
| **10350** |  | **NEG** | **0.009317399** |
| **10351** |  | **NEG** | **0.018320198** |
| **10354** |  | **NEG** | **0.023034493** |
| **10357** |  | **NEG** | **0.016251113** |
| **10377** |  | **NEG** | **0.004062232** |
| **10378** | **Selenohomocystine** | **NEG** | **0.003000375** |
| **10381** |  | **NEG** | **0.011311854** |
| **10384** | **1-Chloro-4-(2,2-dichloro-1-(4-chlorophenyl)ethenyl)-3-(methylsulfonyl)benzene** | **NEG** | **0.005046044** |
| **10388** |  | **NEG** | **0.003231737** |
| **10390** | **Iodo-gen** | **NEG** | **0.000206216** |
| **10391** |  | **NEG** | **0.007643755** |
| **10392** |  | **NEG** | **0.001157115** |
| **10393** |  | **NEG** | **0.000687341** |
| **10394** | **Rhodojaponin IV** | **NEG** | **0.041093886** |
| **10396** | **(1S-Endo)-5-(4-Chloro-3-methylphenyl)-1-((4-methylphenyl)methyl)-N-(1,3,3-trimethylbicyclo(2.2.1)hept-2-yl)-1H-pyrazole-3-carboxamide** | **NEG** | **0.000777416** |
| **10397** |  | **NEG** | **0.000261947** |
| **10398** |  | **NEG** | **0.012036683** |
| **10400** |  | **NEG** | **0.005896277** |
| **10402** |  | **NEG** | **0.006868875** |
| **10403** | **N-[4-[(4As)-1,2,4,4a,5,11-hexahydro-[1,4]oxazino[3,4-c][1,4]benzodiazepine-6-carbonyl]-3-chlorophenyl]-2-phenylbenzamide** | **NEG** | **0.018008197** |
| **10404** |  | **NEG** | **0.000502371** |
| **10405** |  | **NEG** | **0.002228026** |
| **10406** |  | **NEG** | **0.00282175** |
| **10408** |  | **NEG** | **0.000884177** |
| **10409** | **PGP(i-14:0/20:4(6Z,8E,10E,14Z)-2OH(5S,12R))** | **NEG** | **0.001229801** |
| **10410** | **TG(15:0/20:4(5Z,8Z,11Z,14Z)/O-18:0)** | **NEG** | **0.000482037** |
| **10411** |  | **NEG** | **0.004537655** |
| **10413** |  | **NEG** | **0.002137739** |
| **10425** |  | **NEG** | **0.006488084** |
| **10431** |  | **NEG** | **0.005025622** |
| **10434** | **Chlozolite** | **POS** | **0.040198317** |
| **10435** |  | **POS** | **0.003802856** |
| **10438** |  | **POS** | **0.00240929** |
| **10440** |  | **NEG** | **0.000124138** |
| **10443** |  | **NEG** | **0.042487581** |
| **10456** |  | **POS** | **0.046053107** |
| **10457** |  | **POS** | **0.000158778** |
| **10459** |  | **POS** | **0.006693218** |
| **10461** | **Selenohomocystine** | **POS** | **0.011653508** |
| **10462** |  | **POS** | **0.023055459** |
| **10463** |  | **POS** | **0.016974092** |
| **10464** |  | **POS** | **0.000274456** |
| **10465** | **TG(15:0/20:4(5Z,8Z,11Z,14Z)/O-18:0)** | **POS** | **0.00131846** |
| **10466** |  | **POS** | **0.016787749** |
| **10468** |  | **POS** | **0.001715788** |
| **10472** |  | **NEG** | **0.007862578** |
| **10474** |  | **NEG** | **0.002488905** |
| **10477** |  | **NEG** | **0.00023315** |
| **10478** |  | **NEG** | **0.045052329** |
| **10479** | **Fezaflor** | **NEG** | **0.005716316** |
| **10485** |  | **NEG** | **0.006263853** |
| **10488** |  | **NEG** | **0.042105528** |
| **10490** | **N-[(2S)-5-[(1-Amino-2-chloroethylidene)amino]-1-(benzylamino)-1-oxopentan-2-yl]-6-(dimethylamino)naphthalene-2-carboxamide** | **NEG** | **0.039122533** |
| **10494** |  | **NEG** | **0.015530463** |
| **10496** |  | **NEG** | **0.028373997** |
| **10498** |  | **POS** | **0.026668425** |
| **10510** |  | **NEG** | **0.038229767** |
| **10511** |  | **NEG** | **0.003625133** |
| **10512** |  | **NEG** | **0.02494356** |
| **10522** |  | **POS** | **0.002341299** |
| **10524** |  | **POS** | **0.011449141** |
| **10525** | **PGP(i-14:0/20:4(6Z,8E,10E,14Z)-2OH(5S,12R))** | **POS** | **0.009614946** |
| **10527** |  | **POS** | **0.015890036** |
| **10533** |  | **POS** | **0.002641819** |
| **10535** |  | **POS** | **0.014881116** |
| **10537** |  | **POS** | **0.01345209** |
| **10540** | **4-Nitroquinoline N-oxide** | **POS** | **0.014166018** |
| **10541** |  | **POS** | **0.01226997** |
| **10542** |  | **NEG** | **0.031762931** |
| **10550** |  | **NEG** | **0.000976522** |
| **10554** |  | **POS** | **0.002948673** |
| **10558** |  | **POS** | **0.009069461** |
| **10564** |  | **POS** | **0.001191043** |
| **10565** |  | **POS** | **0.034968149** |
| **10574** |  | **NEG** | **0.037345853** |
| **10578** |  | **NEG** | **0.034764277** |
| **10581** |  | **NEG** | **0.037766074** |
| **10583** | **Chlorquinaldol** | **NEG** | **3.57856E-05** |
| **10584** |  | **NEG** | **0.037661599** |
| **10596** | **Potassium bromate** | **NEG** | **0.027354694** |
| **10597** |  | **NEG** | **0.000989649** |
| **10602** |  | **NEG** | **0.001445724** |
| **10606** |  | **POS** | **0.009939065** |
| **10607** |  | **POS** | **0.033748702** |
| **10612** |  | **POS** | **0.00546794** |
| **10617** | **Chlozolite** | **NEG** | **0.046960275** |
| **10619** |  | **NEG** | **0.038789656** |
| **10627** |  | **NEG** | **0.003517964** |
| **10633** |  | **POS** | **0.015390757** |
| **10636** |  | **POS** | **0.014540822** |
| **10637** |  | **POS** | **0.004166271** |
| **10638** |  | **POS** | **0.012718847** |
| **10640** |  | **POS** | **0.032566888** |
| **10643** |  | **NEG** | **0.008455285** |
| **10651** |  | **POS** | **0.000852289** |
| **10658** |  | **NEG** | **0.002221865** |
| **10659** |  | **NEG** | **0.030556639** |
| **10660** |  | **POS** | **0.038443811** |
| **10662** |  | **POS** | **0.003314709** |
| **10663** |  | **NEG** | **0.018744008** |
| **10667** |  | **NEG** | **0.000175** |
| **10669** |  | **NEG** | **0.000291247** |
| **10670** |  | **NEG** | **0.048505974** |
| **10679** | **Flaviolin** | **POS** | **0.008440702** |
| **10682** | **trans-zeatin riboside triphosphate** | **POS** | **0.036755403** |
| **10683** |  | **NEG** | **0.029707008** |
| **10686** |  | **NEG** | **0.029022767** |
| **10687** |  | **NEG** | **2.30331E-05** |
| **10690** |  | **NEG** | **0.002214144** |
| **10691** |  | **NEG** | **0.010020367** |
| **10693** |  | **NEG** | **0.007969507** |
| **10698** |  | **NEG** | **0.003660491** |
| **10708** |  | **NEG** | **0.000850375** |
| **10710** |  | **NEG** | **0.021092367** |
| **10711** |  | **NEG** | **0.033102388** |
| **10713** |  | **NEG** | **0.018950279** |
| **10718** |  | **NEG** | **0.024292119** |
| **10720** |  | **NEG** | **0.000444798** |
| **10721** |  | **POS** | **0.007131706** |
| **10735** |  | **POS** | **0.002598495** |
| **10739** |  | **POS** | **0.026447314** |
| **10741** |  | **POS** | **0.03809871** |
| **10742** |  | **POS** | **0.00823083** |
| **10747** | **1-Chloro-4-(2,2-dichloro-1-(4-chlorophenyl)ethenyl)-3-(methylsulfonyl)benzene** | **POS** | **0.038787787** |
| **10748** |  | **POS** | **0.010637253** |
| **10749** |  | **POS** | **0.000231103** |
| **10750** |  | **POS** | **0.013220743** |
| **10751** |  | **NEG** | **0.047151152** |
| **10753** |  | **POS** | **0.001185291** |
| **10755** |  | **NEG** | **0.031024035** |
| **10762** |  | **NEG** | **0.000274837** |
| **10766** |  | **NEG** | **0.042309409** |
| **10767** |  | **NEG** | **0.015238856** |
| **10769** | **Cetylpyridinium chloride** | **NEG** | **0.025427902** |
| **10780** |  | **NEG** | **0.006909318** |
| **10781** | **UDP-L-Ara4O** | **NEG** | **0.016932447** |
| **10782** |  | **NEG** | **0.035755914** |
| **10786** |  | **NEG** | **0.038388469** |
| **10791** |  | **NEG** | **0.004621255** |
| **10792** |  | **NEG** | **0.003195302** |
| **10795** |  | **NEG** | **5.49729E-05** |
| **10797** |  | **POS** | **0.038693067** |
| **10801** |  | **POS** | **0.026007245** |
| **10802** |  | **NEG** | **0.000390809** |
| **10806** |  | **POS** | **0.00026399** |
| **10810** | **Sulfluramid** | **NEG** | **0.003116464** |
| **10811** |  | **NEG** | **0.029710159** |
| **10814** |  | **POS** | **0.002305062** |
| **10816** |  | **POS** | **0.008048282** |
| **10817** | **Aluminum nicotinate** | **POS** | **0.002112738** |
| **10818** |  | **POS** | **0.000561523** |
| **10819** |  | **POS** | **0.002409829** |
| **10820** |  | **POS** | **0.040834765** |
| **10822** | **4-Pyridoxic acid 5'-phosphate** | **NEG** | **0.024487562** |
| **10824** | **Chlorthiamid** | **POS** | **0.000751531** |
| **10828** |  | **NEG** | **0.004488072** |
| **10830** |  | **NEG** | **0.014418093** |
| **10833** |  | **NEG** | **3.57785E-05** |
| **10834** |  | **NEG** | **0.002086998** |
| **10837** |  | **POS** | **0.024640358** |
| **10843** |  | **NEG** | **0.028683607** |
| **10845** |  | **NEG** | **0.016273943** |
| **10846** |  | **POS** | **3.45346E-06** |
| **10848** |  | **POS** | **0.025221976** |
| **10852** |  | **NEG** | **0.003394196** |
| **10854** | **fructose-6-phosphate pyruvate** | **NEG** | **0.036289086** |
| **10857** |  | **NEG** | **0.044805957** |
| **10859** | **Sulfluramid** | **POS** | **0.001048525** |
| **10863** |  | **POS** | **0.019154558** |
| **10867** | **L-Fuculose 1-phosphate** | **POS** | **0.035930321** |
| **10870** | **Bafilomycin A1(Baf-A1)** | **NEG** | **0.032833695** |
| **10872** | **S-(4-Bromophenyl)-L-cysteine** | **POS** | **0.001817492** |
| **10876** |  | **POS** | **0.041993494** |
| **10877** |  | **POS** | **0.025295231** |
| **10878** | **Isoimide** | **NEG** | **0.021439882** |
| **10879** |  | **NEG** | **0.036997241** |
| **10887** |  | **NEG** | **0.010729223** |
| **10889** |  | **NEG** | **0.00040356** |
| **10891** |  | **NEG** | **0.005275533** |
| **10895** |  | **NEG** | **0.029994525** |
| **10899** |  | **NEG** | **0.004634866** |
| **10900** |  | **NEG** | **0.033670571** |
| **10907** |  | **NEG** | **0.016214945** |
| **10909** |  | **NEG** | **0.003535934** |
| **10912** |  | **POS** | **0.036809637** |
| **10916** |  | **POS** | **0.006207824** |
| **10917** | **Neridronic acid** | **POS** | **0.024997527** |
| **10919** |  | **POS** | **0.01405008** |
| **10920** |  | **NEG** | **0.000303009** |
| **10923** |  | **NEG** | **0.011720472** |
| **10926** |  | **POS** | **0.000252863** |
| **10928** |  | **POS** | **0.001906156** |
| **10932** |  | **NEG** | **0.000169437** |
| **10933** |  | **NEG** | **0.005948573** |
| **10934** |  | **POS** | **0.003621828** |
| **10935** |  | **POS** | **0.009594766** |
| **10936** |  | **POS** | **0.018466146** |
| **10937** |  | **POS** | **2.19147E-05** |
| **10940** |  | **NEG** | **0.017029519** |
| **10945** |  | **NEG** | **0.000595334** |
| **10951** | **1-(2-(1-Adamantyl)ethyl)-1-pentyl-3-(3-(4-pyridyl)propyl)urea** | **NEG** | **0.000748368** |
| **10952** |  | **NEG** | **0.00010786** |
| **10953** |  | **NEG** | **0.005637453** |
| **10954** |  | **NEG** | **6.71938E-05** |
| **10955** |  | **NEG** | **0.001563692** |
| **10957** |  | **POS** | **0.046518035** |
| **10965** |  | **NEG** | **0.003411979** |
| **10970** | **UDP** | **NEG** | **0.000958082** |
| **10974** |  | **POS** | **0.000149596** |
| **10975** | **Tabun** | **POS** | **0.006000468** |
| **10977** | **3-oxobrimonidine** | **POS** | **0.014241941** |
| **10978** |  | **POS** | **0.047842222** |
| **10979** |  | **POS** | **0.004176123** |
| **10980** |  | **POS** | **0.030346897** |
| **10981** | **TG(18:3(9Z,12Z,15Z)/14:0/18:3(9Z,12Z,15Z))** | **POS** | **0.013534486** |
| **10986** |  | **POS** | **0.001202093** |
| **10988** |  | **POS** | **0.00324911** |
| **10989** |  | **POS** | **2.94077E-05** |
| **10992** |  | **NEG** | **0.003654208** |
| **11000** |  | **POS** | **0.004392282** |
| **11003** | **S-(4-Bromophenyl)-L-cysteine** | **NEG** | **0.000422308** |
| **11004** | **Neridronic acid** | **NEG** | **0.000702946** |
| **11005** |  | **NEG** | **0.006340937** |
| **11010** |  | **NEG** | **0.001477531** |
| **11011** | **5-Nitrofurfural** | **NEG** | **0.001411391** |
| **11013** |  | **NEG** | **0.012979381** |
| **11017** | **3,4,3',4'-Tetrachlorobiphenyl** | **NEG** | **0.003347642** |
| **11025** | **Stipitatate** | **POS** | **0.009382847** |
| **11026** |  | **POS** | **0.004946476** |
| **11028** |  | **POS** | **0.007508439** |
| **11030** | **Erythrityl Tetranitrate** | **POS** | **0.000782927** |
| **11036** |  | **POS** | **0.000468668** |
| **11037** |  | **POS** | **0.045612451** |
| **11041** |  | **NEG** | **0.01356862** |
| **11048** | **2,4-Dihydroxypteridine** | **POS** | **0.023233055** |
| **11049** | **Nitroimidazo-oxazine** | **POS** | **0.019993403** |
| **11051** |  | **POS** | **0.000133161** |
| **11052** |  | **POS** | **0.007993145** |
| **11056** |  | **NEG** | **0.022197023** |
| **11058** |  | **POS** | **3.93846E-07** |
| **11059** | **5-Diazouracil** | **POS** | **0.000182072** |
| **11061** |  | **POS** | **0.001606937** |
| **11064** |  | **POS** | **0.000979572** |
| **11065** |  | **NEG** | **0.009117736** |
| **11069** | **Dipicrylamine** | **NEG** | **0.038327075** |
| **11072** | **Meclofemate sodium** | **NEG** | **0.007084254** |
| **11078** | **(2-Methylphenyl) Dihydrogen Phosphate** | **POS** | **0.003935828** |
| **11081** |  | **POS** | **0.049461165** |
| **11086** |  | **POS** | **0.001315968** |
| **11088** | **Chloramphenicol sodium succite** | **POS** | **0.047742319** |
| **11094** | **Uracil** | **NEG** | **0.007230756** |
| **11096** |  | **NEG** | **0.000738841** |
| **11098** |  | **NEG** | **0.00821934** |
| **11100** |  | **NEG** | **0.012168879** |
| **11101** |  | **NEG** | **0.011366163** |
| **11105** |  | **NEG** | **0.002507746** |
| **11106** |  | **NEG** | **0.016870175** |
| **11109** |  | **NEG** | **0.000121277** |
| **11110** |  | **NEG** | **1.26024E-05** |
| **11113** |  | **NEG** | **0.000174321** |
| **11114** |  | **NEG** | **0.000131958** |
| **11118** |  | **NEG** | **0.000533656** |
| **11119** |  | **NEG** | **0.024738815** |
| **11122** |  | **NEG** | **0.000708546** |
| **11123** |  | **NEG** | **0.00211795** |
| **11124** |  | **NEG** | **0.006146701** |
| **11125** |  | **POS** | **0.008942024** |
| **11130** |  | **NEG** | **0.018020944** |
| **11132** |  | **POS** | **0.012689676** |
| **11135** |  | **POS** | **9.68174E-05** |
| **11139** |  | **NEG** | **0.033571406** |
| **11140** | **Ara-C triphosphate** | **NEG** | **0.002167491** |
| **11142** |  | **POS** | **0.000928793** |
| **11143** | **5-Hydroxyisourate** | **POS** | **0.001542371** |
| **11146** |  | **POS** | **0.019536224** |
| **11147** |  | **POS** | **0.01207111** |
| **11151** | **IB-Meca** | **NEG** | **0.007151911** |
| **11152** | **ISOPROPYL METHYLPHOSPHONATE** | **POS** | **0.015886274** |
| **11154** |  | **POS** | **0.002863927** |
| **11156** |  | **POS** | **0.000121558** |
| **11157** |  | **POS** | **0.001285268** |
| **11165** |  | **NEG** | **0.019278354** |
| **11175** |  | **NEG** | **0.012934281** |
| **11177** |  | **NEG** | **0.016278952** |
| **11182** |  | **NEG** | **0.001827009** |
| **11183** |  | **NEG** | **0.009367285** |
| **11186** |  | **NEG** | **0.019403313** |
| **11187** |  | **NEG** | **0.044344089** |
| **11189** |  | **POS** | **0.004789151** |
| **11190** |  | **NEG** | **0.026862361** |
| **11192** |  | **NEG** | **0.005295492** |
| **11199** | **Propyzamide** | **POS** | **0.000100579** |
| **11210** |  | **NEG** | **0.024111425** |
| **11211** |  | **NEG** | **0.005622934** |
| **11221** |  | **NEG** | **0.001122252** |
| **11222** | **1-(5-Phospho-D-ribosyl)-ATP** | **NEG** | **0.004757639** |
| **11223** |  | **NEG** | **0.035485639** |
| **11230** | **5-Fluorodeoxyuridine monophosphate** | **NEG** | **0.001148544** |
| **11231** |  | **NEG** | **0.012349339** |
| **11232** |  | **NEG** | **0.034006155** |
| **11234** |  | **NEG** | **0.014102204** |
| **11237** |  | **NEG** | **5.6799E-05** |
| **11240** |  | **NEG** | **0.004089971** |
| **11241** |  | **NEG** | **0.039233657** |
| **11242** |  | **POS** | **0.000108258** |
| **11244** | **1-(5-Phospho-D-ribosyl)-ATP** | **POS** | **0.008229751** |
| **11245** | **Nivacortol** | **NEG** | **0.017138466** |
| **11247** |  | **POS** | **0.004824889** |
| **11251** |  | **POS** | **0.029356842** |
| **11252** |  | **NEG** | **0.020351627** |
| **11257** |  | **POS** | **0.003270018** |
| **11258** |  | **POS** | **0.027159895** |
| **11260** |  | **POS** | **0.013566076** |
| **11261** |  | **NEG** | **0.000244028** |
| **11262** | **L-Selenocystathionine** | **POS** | **0.020636795** |
| **11263** |  | **POS** | **0.006238081** |
| **11264** |  | **NEG** | **0.003008358** |
| **11270** | **Clopyralid** | **NEG** | **0.001376139** |
| **11275** |  | **NEG** | **5.76341E-05** |
| **11276** |  | **NEG** | **4.1975E-05** |
| **11277** | **Pyridoxal phosphate** | **POS** | **0.013014641** |
| **11283** |  | **NEG** | **0.000575137** |
| **11285** |  | **NEG** | **0.000734556** |
| **11286** |  | **NEG** | **0.009312538** |
| **11287** |  | **NEG** | **0.000986466** |
| **11290** |  | **POS** | **0.003160309** |
| **11291** |  | **POS** | **0.012571851** |
| **11292** |  | **NEG** | **0.022446141** |
| **11293** | **Sitosterol 3-O-(6'-O-stearyl-beta-D-glucoside)** | **NEG** | **0.011952346** |
| **11294** | **3-O-Sulfogalactosylceramide (d18:1/22:0)** | **NEG** | **0.008329839** |
| **11295** |  | **POS** | **0.025272723** |
| **11296** |  | **NEG** | **0.000469513** |
| **11298** |  | **NEG** | **0.008781702** |
| **11299** |  | **POS** | **0.008390474** |
| **11303** | **Nivacortol** | **POS** | **0.024982626** |
| **11305** |  | **POS** | **0.004310549** |
| **11306** |  | **POS** | **0.009345025** |
| **11308** |  | **NEG** | **0.042745282** |
| **11315** |  | **NEG** | **0.002830605** |
| **11316** |  | **NEG** | **0.031622907** |
| **11319** |  | **POS** | **0.046810462** |
| **11324** |  | **NEG** | **0.008914686** |
| **11329** |  | **NEG** | **0.002102933** |
| **11330** |  | **NEG** | **0.003308112** |
| **11333** |  | **NEG** | **0.01467876** |
| **11335** |  | **NEG** | **0.000771293** |
| **11339** |  | **POS** | **0.001587536** |
| **11343** |  | **POS** | **0.040185736** |
| **11348** |  | **NEG** | **0.001309904** |
| **11352** |  | **POS** | **0.028725725** |
| **11354** |  | **POS** | **0.000398551** |
| **11355** | **S-(1,2-Dichlorovinyl)-L-cysteine** | **NEG** | **0.039611043** |
| **11359** |  | **POS** | **0.032086185** |
| **11360** |  | **POS** | **0.019153553** |
| **11361** |  | **POS** | **0.001718167** |
| **11362** |  | **POS** | **0.022268167** |
| **11364** |  | **POS** | **0.022314783** |
| **11367** | **Lamivudine-triphosphate** | **NEG** | **0.003328284** |
| **11374** |  | **NEG** | **0.000941639** |
| **11376** | **2-Methyl-5-nitroimidazol-1-ylacetic acid** | **POS** | **0.048529463** |
| **11379** |  | **POS** | **0.004477447** |
| **11382** |  | **NEG** | **0.002383009** |
| **11389** | **Iodopindolol** | **NEG** | **0.006889368** |
| **11390** | **1,25-Dihydroxy-19-norvitamin D3** | **NEG** | **0.010003813** |
| **11392** | **2,5-Diaminopyrimidine nucleoside triphosphate** | **NEG** | **1.69455E-05** |
| **11394** | **Casoxin D** | **POS** | **0.002584702** |
| **11399** | **N-(2,4-Dichlorobenzyl)-2,2,2-trifluoro-N-(3-nitrophenyl)acetamide** | **POS** | **0.042082928** |
| **11403** | **Indoleglycerol phosphate** | **POS** | **0.042088804** |
| **11404** | **2,5-Diaminopyrimidine nucleoside triphosphate** | **POS** | **0.000435253** |
| **11410** |  | **POS** | **0.000562945** |
| **11411** |  | **POS** | **0.02342855** |
| **11412** | **Carbovir Triphosphate** | **NEG** | **0.00052973** |
| **11415** |  | **POS** | **0.000179642** |
| **11416** |  | **NEG** | **0.000266928** |
| **11422** |  | **NEG** | **0.000470907** |
| **11423** |  | **NEG** | **0.000548074** |
| **11426** | **3,4-Dimethyl-5-propyl-2-furanpentadecanoic acid** | **NEG** | **0.003660693** |
| **11427** |  | **NEG** | **6.19407E-05** |
| **11428** |  | **POS** | **0.002666607** |
| **11430** |  | **POS** | **0.006152367** |
| **11434** |  | **NEG** | **0.001135902** |
| **11435** |  | **NEG** | **0.009297342** |
| **11438** |  | **NEG** | **0.000922605** |
| **11439** |  | **NEG** | **3.69314E-05** |
| **11443** |  | **POS** | **0.000749174** |
| **11447** |  | **NEG** | **0.00097816** |
| **11449** | **Cyclopentenylcytosine 6-triphosphate** | **NEG** | **0.002184188** |
| **11451** | **4-Nitro-6-oxohepta-2,4-dienedioate** | **POS** | **0.000674052** |
| **11452** | **2-(3,5-Dichlorophenylcarbamoyl)-1,2-dimethylcyclopropane-1-carboxylic acid** | **POS** | **0.009820352** |
| **11454** |  | **POS** | **0.014662028** |
| **11460** |  | **POS** | **0.003289135** |
| **11461** |  | **POS** | **0.018197918** |
| **11462** |  | **POS** | **0.000547629** |
| **11463** | **ADP-ribose** | **POS** | **0.000252679** |
| **11464** |  | **POS** | **9.00401E-05** |
| **11465** |  | **POS** | **0.00063486** |
| **11467** |  | **NEG** | **0.005026954** |
| **11468** |  | **NEG** | **0.022117471** |
| **11469** |  | **POS** | **0.030399117** |
| **11470** |  | **POS** | **0.002730965** |
| **11471** | **Esterase** | **POS** | **0.035095747** |
| **11474** |  | **NEG** | **0.000542961** |
| **11477** |  | **NEG** | **0.027747909** |
| **11478** |  | **POS** | **0.001403655** |
| **11479** |  | **POS** | **0.044868458** |
| **11480** |  | **POS** | **0.000530096** |
| **11482** |  | **NEG** | **0.005377549** |
| **11485** |  | **POS** | **0.007640047** |
| **11488** |  | **POS** | **0.009759721** |
| **11493** |  | **NEG** | **0.002384865** |
| **11497** |  | **POS** | **9.49419E-05** |
| **11505** | **Bicarbonate carbon** | **POS** | **0.000302039** |
| **11508** | **Sedoheptulose 1,7-bisphosphate** | **NEG** | **0.00833342** |
| **11509** | **Meconic acid** | **POS** | **0.008217185** |
| **11510** |  | **POS** | **2.10963E-05** |
| **11511** |  | **POS** | **0.046813785** |
| **11513** |  | **POS** | **0.008092905** |
| **11520** |  | **NEG** | **0.031224173** |
| **11523** | **6-(Dibromomethylene)-17beta-hydroxyandrost-4-en-3-one** | **NEG** | **0.008624117** |
| **11524** |  | **NEG** | **0.000129764** |
| **11525** |  | **NEG** | **8.89113E-05** |
| **11528** |  | **POS** | **0.000762808** |
| **11532** | **2-Methyl-1,4-naphthalenediol bis(dihydrogen phosphate)** | **NEG** | **0.002042069** |
| **11533** |  | **NEG** | **0.01082283** |
| **11534** |  | **NEG** | **0.000410418** |
| **11535** |  | **NEG** | **0.046800334** |
| **11539** | **Barban** | **NEG** | **0.007008781** |
| **11541** |  | **NEG** | **0.000849508** |
| **11543** | **PA(12:0/18:1(12Z)-2OH(9,10))** | **POS** | **0.035801988** |
| **11546** |  | **POS** | **0.013030273** |
| **11551** |  | **POS** | **0.002304986** |
| **11552** | **Cyclopentenylcytosine 6-triphosphate** | **POS** | **0.030301426** |
| **11554** |  | **POS** | **7.93847E-05** |
| **11558** | **5-Fluorouridine monophosphate** | **POS** | **0.000313566** |
| **11562** |  | **NEG** | **0.0420874** |
| **11563** | **1-Cyano-N-[4-(trifluoromethoxy)phenyl]formohydrazide** | **NEG** | **0.01248665** |
| **11568** |  | **NEG** | **0.00163362** |
| **11573** | **XDP** | **NEG** | **0.029910361** |
| **11574** |  | **NEG** | **0.036492572** |
| **11575** |  | **NEG** | **0.03607203** |
| **11576** |  | **NEG** | **8.30043E-05** |
| **11584** |  | **NEG** | **0.001983829** |
| **11585** |  | **NEG** | **0.021147006** |
| **11589** |  | **POS** | **0.038715777** |
| **11594** | **Nonafluorobutanesulfonyl fluoride** | **NEG** | **0.001124742** |
| **11596** |  | **NEG** | **0.000140026** |
| **11597** |  | **NEG** | **0.017998007** |
| **11598** |  | **POS** | **0.000139169** |
| **11599** |  | **POS** | **0.00624521** |
| **11601** |  | **POS** | **0.002637282** |
| **11602** |  | **POS** | **0.001789065** |
| **11604** |  | **NEG** | **0.045741922** |
| **11608** |  | **NEG** | **0.000493297** |
| **11609** |  | **NEG** | **0.017228599** |
| **11610** |  | **NEG** | **0.045733723** |
| **11613** |  | **POS** | **0.003934049** |
| **11615** |  | **POS** | **0.038237367** |
| **11616** |  | **NEG** | **0.004112516** |
| **11617** |  | **NEG** | **0.001860471** |
| **11618** |  | **POS** | **0.012033347** |
| **11622** |  | **NEG** | **0.001640812** |
| **11623** |  | **NEG** | **0.030293706** |
| **11630** |  | **NEG** | **0.024589435** |
| **11632** |  | **NEG** | **0.001221238** |
| **11633** |  | **NEG** | **0.011244307** |
| **11635** |  | **NEG** | **0.000363434** |
| **11636** |  | **NEG** | **0.012134594** |
| **11637** | **3,5,7-Trihydroxy-4'-methoxy-8-prenylflavone 3-[rhamnosyl-(1->6)-galactoside] 7-galactoside** | **NEG** | **0.003894264** |
| **11642** | **Diclofenac acyl glucuronide** | **POS** | **0.005925467** |
| **11649** |  | **NEG** | **2.7932E-05** |
| **11650** | **Oxpocozole fumarate** | **NEG** | **0.018545282** |
| **11653** |  | **POS** | **0.033628294** |
| **11655** |  | **POS** | **0.000497661** |
| **11657** |  | **POS** | **0.005569856** |
| **11658** |  | **POS** | **0.043449256** |
| **11661** | **Fluoroimide** | **NEG** | **0.002215857** |
| **11662** |  | **NEG** | **0.000954163** |
| **11665** |  | **POS** | **0.011342593** |
| **11666** | **Cholesterol sulfate** | **POS** | **0.030043939** |
| **11673** |  | **POS** | **0.011125502** |
| **11675** |  | **POS** | **5.85725E-05** |
| **11676** |  | **NEG** | **0.038855741** |
| **11680** |  | **NEG** | **0.001114182** |
| **11683** |  | **POS** | **9.17191E-06** |
| **11684** | **1-(3',4'-Dichloro-2-fluoro(1,1'-biphenyl)-4-yl)cyclopropanecarboxylic acid** | **NEG** | **0.01638368** |
| **11686** | **Dichlozoline** | **POS** | **0.014739352** |
| **11691** |  | **POS** | **0.0002643** |
| **11693** |  | **NEG** | **1.62313E-08** |
| **11702** | **Cholesterol sulfate** | **NEG** | **0.003163216** |
| **11703** |  | **NEG** | **0.031425604** |
| **11707** |  | **POS** | **0.004432514** |
| **11711** |  | **NEG** | **0.021046023** |
| **11714** | **5-(3-Aminopropylphosphanyloxy)-2-(hydroxymethyl)pyran-4-one** | **POS** | **0.001686462** |
| **11716** |  | **POS** | **0.030023435** |
| **11723** |  | **POS** | **0.006717112** |
| **11725** |  | **NEG** | **0.003779028** |
| **11730** | **Eudistomin G** | **NEG** | **0.018725588** |
| **11732** |  | **NEG** | **0.000444017** |
| **11733** | **2,4-Dinitroaniline** | **POS** | **0.02206682** |
| **11735** |  | **POS** | **0.003477752** |
| **11736** |  | **POS** | **0.000139546** |
| **11739** |  | **NEG** | **0.010771377** |
| **11740** |  | **POS** | **0.008367138** |
| **11743** |  | **NEG** | **0.01267808** |
| **11744** |  | **NEG** | **6.69383E-05** |
| **11748** | **Avenin** | **POS** | **0.013554838** |
| **11749** | **3,5-dihydroxy-4-(sulfooxy)benzoic acid** | **POS** | **0.012289504** |
| **11758** |  | **NEG** | **0.015147597** |
| **11760** |  | **NEG** | **0.006145792** |
| **11763** |  | **POS** | **0.00071508** |
| **11766** |  | **POS** | **0.013767148** |
| **11768** |  | **POS** | **0.012098147** |
| **11775** |  | **NEG** | **0.021422446** |
| **11776** |  | **NEG** | **0.001518748** |
| **11777** |  | **POS** | **0.000230761** |
| **11779** |  | **POS** | **0.000116244** |
| **11780** |  | **POS** | **0.001286295** |
| **11783** |  | **POS** | **0.009612895** |
| **11786** |  | **POS** | **0.005509866** |
| **11788** |  | **POS** | **0.004944794** |
| **11791** |  | **POS** | **2.99936E-06** |
| **11794** |  | **POS** | **0.030489756** |
| **11795** | **Dulofibrate** | **NEG** | **8.42714E-05** |
| **11796** | **1-phthaleneacetic acid sodium salt** | **POS** | **0.000179417** |
| **11798** |  | **POS** | **0.00413741** |
| **11799** |  | **NEG** | **6.81058E-05** |
| **11801** | **Lopirazepam** | **POS** | **0.015121003** |
| **11806** |  | **POS** | **0.001180457** |
| **11807** |  | **NEG** | **0.005976548** |
| **11808** |  | **NEG** | **0.028118549** |
| **11810** |  | **NEG** | **0.017940666** |
| **11812** | **6-Deoxy-6-sulfo-D-fructose 1-phosphate** | **NEG** | **0.000503034** |
| **11813** |  | **NEG** | **0.000350025** |
| **11816** |  | **POS** | **0.003251544** |
| **11817** |  | **NEG** | **0.049703537** |
| **11821** |  | **NEG** | **0.014012995** |
| **11825** |  | **NEG** | **0.000103227** |
| **11826** |  | **NEG** | **0.00258038** |
| **11827** |  | **POS** | **0.004938958** |
| **11835** |  | **NEG** | **0.039743405** |
| **11836** | **Tetrahydroxypteridine** | **POS** | **0.007487573** |
| **11837** | **N-Benzyloxycarbonylglycine** | **POS** | **0.006109705** |
| **11839** |  | **POS** | **0.038354296** |
| **11842** |  | **POS** | **0.006856201** |
| **11847** |  | **POS** | **0.007728211** |
| **11850** |  | **POS** | **0.009941225** |
| **11851** |  | **POS** | **0.009207353** |
| **11853** | **fructose-6-phosphate pyruvate** | **NEG** | **0.016914676** |
| **11859** |  | **NEG** | **8.98587E-05** |
| **11871** |  | **NEG** | **7.99988E-06** |
| **11873** |  | **NEG** | **0.028397425** |
| **11874** | **(6-Isocyanatohexyl)carbamic acid 3beta-cholesteryl ester** | **NEG** | **0.001003982** |
| **11879** |  | **NEG** | **0.002278689** |
| **11883** | **Cefsulodin sodium** | **NEG** | **0.028707388** |
| **11887** |  | **POS** | **0.047992048** |
| **11896** |  | **NEG** | **0.016841407** |
| **11897** |  | **POS** | **1.17252E-05** |
| **11908** |  | **NEG** | **0.023917911** |
| **11914** |  | **NEG** | **0.002800816** |
| **11917** |  | **NEG** | **0.02183567** |
| **11918** |  | **NEG** | **0.001365643** |
| **11920** | **dCTP** | **POS** | **0.040618155** |
| **11928** |  | **NEG** | **0.023435166** |
| **11930** | **Diethylphosphoric acid** | **POS** | **0.047223689** |
| **11931** | **S-(1,2-dichlorovinyl)-L-cysteine sulfoxide** | **POS** | **0.016164918** |
| **11936** |  | **NEG** | **0.001972413** |
| **11937** |  | **POS** | **0.000487614** |
| **11940** |  | **POS** | **0.000376278** |
| **11949** |  | **POS** | **0.001187549** |
| **11958** |  | **NEG** | **0.033372689** |
| **11959** |  | **NEG** | **0.002357085** |
| **11963** |  | **NEG** | **0.001169133** |
| **11973** |  | **NEG** | **0.001314939** |
| **11974** | **uric acid oxalate** | **POS** | **0.021000886** |
| **11977** | **(1S,3R)-3-(2,2-Dichloroethenyl)-2,2-dimethylcyclopropanecarboxylate** | **NEG** | **0.024465072** |
| **11979** |  | **NEG** | **0.011070819** |
| **11980** |  | **POS** | **0.017653941** |
| **11982** |  | **POS** | **0.016315061** |
| **11983** |  | **POS** | **0.035568834** |
| **11984** |  | **NEG** | **0.016208278** |
| **11985** |  | **NEG** | **0.000210554** |
| **11990** |  | **POS** | **0.016322898** |
| **11991** | **S-(-)-ureidoglycolate** | **NEG** | **0.00204841** |
| **11992** |  | **NEG** | **0.028771692** |
| **11994** |  | **NEG** | **0.034635587** |
| **11995** | **4-Nitrophenyl phosphate** | **NEG** | **0.011330434** |
| **11996** |  | **NEG** | **0.019860512** |
| **11997** |  | **NEG** | **0.03189544** |
| **11999** |  | **NEG** | **0.003246732** |
| **12001** |  | **NEG** | **0.000364404** |
| **12006** |  | **NEG** | **0.011525171** |
| **12007** |  | **NEG** | **0.01953689** |
| **12009** |  | **NEG** | **0.047117995** |
| **12012** |  | **NEG** | **5.53183E-05** |
| **12013** |  | **NEG** | **0.010785826** |
| **12014** |  | **NEG** | **0.011481021** |
| **12016** |  | **NEG** | **0.001469372** |
| **12017** |  | **NEG** | **0.02346477** |
| **12019** | **Flusulfamide** | **NEG** | **0.000288614** |
| **12023** |  | **NEG** | **0.003613907** |
| **12028** |  | **NEG** | **0.007331237** |
| **12031** |  | **POS** | **0.010830013** |
| **12032** |  | **NEG** | **0.04703122** |
| **12033** |  | **NEG** | **0.00040339** |
| **12035** | **Iron octanoate** | **POS** | **0.008312441** |
| **12037** | **1-(5-Phospho-D-ribosyl)-5-amino-4-imidazolecarboxylate** | **POS** | **0.001313875** |
| **12040** |  | **NEG** | **0.000244294** |
| **12041** |  | **NEG** | **0.002051699** |
| **12042** |  | **POS** | **0.000251579** |
| **12043** |  | **POS** | **7.24743E-06** |
| **12050** |  | **NEG** | **0.0060614** |
| **12051** | **Phosphocreatine lactate** | **POS** | **0.004209979** |
| **12056** |  | **NEG** | **0.003600291** |
| **12060** |  | **POS** | **0.012566953** |
| **12062** |  | **NEG** | **4.94694E-06** |
| **12065** |  | **POS** | **0.010510262** |
| **12067** |  | **POS** | **0.017864514** |
| **12068** |  | **POS** | **0.003320195** |
| **12072** |  | **NEG** | **0.001478232** |
| **12073** |  | **NEG** | **0.021359355** |
| **12074** |  | **POS** | **0.005743547** |
| **12077** |  | **POS** | **0.004707521** |
| **12079** |  | **NEG** | **0.010311368** |
| **12080** | **Ammeline** | **POS** | **0.006589996** |
| **12081** |  | **POS** | **0.002696327** |
| **12090** |  | **POS** | **0.012470195** |
| **12094** |  | **POS** | **0.009627629** |
| **12098** |  | **NEG** | **0.008583173** |
| **12099** |  | **NEG** | **0.018526996** |
| **12101** |  | **POS** | **0.003981449** |
| **12102** |  | **POS** | **0.011607959** |
| **12105** |  | **NEG** | **0.00077859** |
| **12106** | **Bis(glycerophospho)-glycerol** | **NEG** | **0.003690903** |
| **12110** |  | **POS** | **0.013918823** |
| **12111** |  | **POS** | **0.001051955** |
| **12114** |  | **NEG** | **0.035311907** |
| **12115** |  | **NEG** | **0.01122643** |
| **12117** |  | **POS** | **0.000676338** |
| **12122** |  | **POS** | **0.035227103** |
| **12126** | **Nav1.7 blocker 24** | **NEG** | **0.010175773** |
| **12127** | **Lamotrigine** | **POS** | **0.000143579** |
| **12129** |  | **NEG** | **0.044137038** |
| **12133** |  | **POS** | **0.008079927** |
| **12137** | **2,2-Dichloro-N-[2-hydroxy-1-(hydroxymethyl)-2-(4-nitrosophenyl)ethyl]acetamide** | **NEG** | **0.049391499** |
| **12139** |  | **NEG** | **2.06936E-05** |
| **12142** | **dTTP** | **NEG** | **0.016514716** |
| **12147** |  | **NEG** | **0.031763672** |
| **12149** |  | **NEG** | **0.001584001** |
| **12155** |  | **NEG** | **0.021542899** |
| **12156** |  | **NEG** | **0.003072183** |
| **12157** |  | **POS** | **0.011930946** |
| **12159** |  | **POS** | **0.02829331** |
| **12160** |  | **POS** | **0.0009236** |
| **12161** | **3,4-Dihydroxyphthalate** | **POS** | **0.001821137** |
| **12162** | **3-(4-Iodophenyl)-2-mercapto-(Z)-2-propenoic acid** | **POS** | **0.00911685** |
| **12182** |  | **NEG** | **0.04155813** |
| **12183** |  | **NEG** | **0.018290314** |
| **12184** |  | **POS** | **0.000108035** |
| **12185** |  | **POS** | **0.006939901** |
| **12186** |  | **POS** | **0.004104857** |
| **12188** |  | **NEG** | **0.001026864** |
| **12189** | **Emetine** | **NEG** | **0.002183874** |
| **12191** | **Yersiniabactin** | **POS** | **0.000784408** |
| **12194** | **Pyrifenox** | **POS** | **0.022406208** |
| **12197** |  | **NEG** | **0.007633483** |
| **12198** |  | **POS** | **0.018732208** |
| **12200** |  | **NEG** | **0.003343123** |
| **12201** |  | **NEG** | **0.004937131** |
| **12203** | **Emetine** | **POS** | **0.004095175** |
| **12208** |  | **POS** | **3.09433E-05** |
| **12213** | **1,7-diphospho-1-epi-valienol** | **NEG** | **0.007763107** |
| **12214** | **CDP-ethanolamine** | **NEG** | **0.004986542** |
| **12217** |  | **POS** | **0.03862059** |
| **12221** | **Batefenterol** | **NEG** | **0.000358621** |
| **12224** |  | **POS** | **0.033812936** |
| **12230** |  | **NEG** | **0.014670286** |
| **12236** |  | **POS** | **0.000685426** |
| **12237** |  | **POS** | **0.042084464** |
| **12238** |  | **POS** | **0.004229281** |
| **12240** |  | **NEG** | **0.031819039** |
| **12241** |  | **NEG** | **0.009812463** |
| **12242** |  | **NEG** | **0.004399765** |
| **12243** | **2-O-(alpha-D-Mannosyl)-D-glycerate** | **POS** | **1.58589E-05** |
| **12255** |  | **NEG** | **0.001062105** |
| **12257** | **PC(24:0/P-18:0)** | **NEG** | **0.037384163** |
| **12263** | **Anhydroamarouciaxanthin B** | **POS** | **0.014031874** |
| **12264** |  | **NEG** | **0.007205045** |
| **12266** |  | **NEG** | **0.000345622** |
| **12268** | **Cholylarginine** | **NEG** | **0.035394386** |
| **12273** |  | **POS** | **0.022528197** |
| **12274** |  | **POS** | **0.005448941** |
| **12276** |  | **NEG** | **0.032297067** |
| **12277** |  | **NEG** | **0.008220752** |
| **12285** | **Vinclozolin** | **NEG** | **0.033547583** |
| **12286** |  | **NEG** | **0.001192623** |
| **12289** |  | **POS** | **0.017090136** |
| **12291** |  | **POS** | **0.006638865** |
| **12292** |  | **NEG** | **0.048173973** |
| **12294** |  | **POS** | **0.002711862** |
| **12295** |  | **POS** | **0.027817894** |
| **12296** |  | **NEG** | **0.020468792** |
| **12300** | **1-(5-Phospho-D-ribosyl)-ATP** | **POS** | **0.003145651** |
| **12301** | **Mertansine** | **POS** | **0.007464902** |
| **12302** |  | **NEG** | **0.039159969** |
| **12303** |  | **NEG** | **0.004981887** |
| **12310** |  | **NEG** | **0.013766771** |
| **12312** |  | **NEG** | **0.007829973** |
| **12318** | **Tetracosanoic acid** | **POS** | **0.008386654** |
| **12323** |  | **NEG** | **0.004138149** |
| **12326** |  | **NEG** | **0.001425395** |
| **12336** |  | **NEG** | **0.006318063** |
| **12337** |  | **NEG** | **0.03585376** |
| **12342** |  | **POS** | **0.048232073** |
| **12343** |  | **POS** | **0.016497251** |
| **12344** |  | **POS** | **0.008309262** |
| **12345** |  | **POS** | **0.02563436** |
| **12346** |  | **POS** | **0.014171403** |
| **12349** |  | **POS** | **0.000333839** |
| **12354** | **2',3'-Dideoxycytidine-5'-monophosphate** | **POS** | **0.000563548** |
| **12356** | **SM(d18:1/26:1(17Z))** | **POS** | **0.029216037** |
| **12368** |  | **POS** | **0.002446143** |
| **12371** |  | **NEG** | **0.00091949** |
| **12372** |  | **NEG** | **0.009172949** |
| **12373** | **1-(5-Phospho-D-ribosyl)-ATP** | **NEG** | **0.027305302** |
| **12375** | **Creatinine oxalate** | **POS** | **0.000109777** |
| **12377** | **Hexaflurate** | **POS** | **0.005996016** |
| **12384** |  | **NEG** | **0.018961467** |
| **12388** |  | **POS** | **0.032069904** |
| **12389** | **Trisodium nitrilotriacetate** | **NEG** | **0.00238082** |
| **12390** |  | **NEG** | **0.007113187** |
| **12396** |  | **POS** | **0.006842005** |
| **12398** | **Benoxacor** | **POS** | **0.023711334** |
| **12400** |  | **NEG** | **0.001188523** |
| **12404** |  | **POS** | **0.047167614** |
| **12408** |  | **POS** | **0.000661996** |
| **12411** |  | **NEG** | **0.001030897** |
| **12413** | **Eltenac** | **NEG** | **0.001778591** |
| **12414** |  | **POS** | **0.001123222** |
| **12416** | **Adenosine 5-O-(3-thiodiphophate)** | **POS** | **0.019322772** |
| **12424** |  | **NEG** | **0.009364126** |
| **12427** |  | **NEG** | **0.023771517** |
| **12428** |  | **NEG** | **0.005817102** |
| **12434** |  | **POS** | **0.019539326** |
| **12436** | **Nitroimidazo-oxazine** | **NEG** | **0.036170539** |
| **12437** | **Pentafluorophenyl isothiocyanate** | **POS** | **0.019507489** |
| **12443** | **2,6-Dichlorophenolindophenol sodium salt** | **NEG** | **0.017341104** |
| **12444** |  | **POS** | **0.044149733** |
| **12445** |  | **NEG** | **0.034694491** |
| **12447** | **Pydanon** | **POS** | **0.010957861** |
| **12449** |  | **POS** | **0.013667755** |
| **12452** |  | **NEG** | **0.003172589** |
| **12453** | **4-hydroxytriazolam** | **NEG** | **0.011830932** |
| **12464** |  | **NEG** | **0.019606861** |
| **12472** | **N-Ethyl-1,1,2,2,3,3,4,4,5,5,6,6,7,7,8,8,8-heptadecafluoro-N-(2-hydroxyethyl)octane-1-sulfonamide** | **NEG** | **0.025677739** |
| **12475** | **1-Iodobutane** | **POS** | **0.000440209** |
| **12477** |  | **POS** | **0.040615723** |
| **12482** |  | **NEG** | **0.006009256** |
| **12484** | **1,2,4-Triazole** | **POS** | **0.002193607** |
| **12486** | **Butote** | **POS** | **0.042362582** |
| **12489** |  | **NEG** | **0.006213471** |
| **12491** |  | **NEG** | **0.026549111** |
| **12493** |  | **POS** | **0.000139037** |
| **12497** | **Pyromellitic dianhydride** | **NEG** | **0.005526235** |
| **12498** |  | **NEG** | **0.001711636** |
| **12500** |  | **POS** | **0.003020507** |
| **12503** | **4-hydroxytriazolam** | **POS** | **0.008775903** |
| **12504** | **Benzoic acid, 2-[3,6-bis(acetyloxy)-2,7-dichloro-9H-xanthen-9-yl]-** | **POS** | **0.000653528** |
| **12510** |  | **NEG** | **0.04722135** |
| **12511** |  | **POS** | **0.022525408** |
| **12512** | **N-(3,5-Dichlorophenyl)-2-hydroxysuccinimide** | **POS** | **0.002013211** |
| **12514** |  | **POS** | **0.012563225** |
| **12518** |  | **NEG** | **0.019809348** |
| **12521** | **Pexidartinib** | **NEG** | **0.044091378** |
| **12522** | **Sodium tartrate** | **POS** | **0.002765412** |
| **12524** |  | **POS** | **0.002744078** |
| **12526** | **Methylselenopyruvate** | **NEG** | **0.01543673** |
| **12527** |  | **NEG** | **0.016012474** |
| **12532** |  | **NEG** | **0.02456561** |
| **12536** | **2-Amino-5,6-dichloro-3,4,-dihydroquinazoline** | **POS** | **0.001353917** |
| **12540** |  | **POS** | **0.002691367** |
| **12541** |  | **POS** | **0.001769331** |
| **12544** |  | **POS** | **0.014463412** |
| **12546** |  | **NEG** | **0.02157901** |
| **12549** |  | **POS** | **0.000822779** |
| **12550** |  | **POS** | **8.68851E-05** |
| **12553** | **Adenosine 5'-phosphate disodium** | **NEG** | **0.001077504** |
| **12556** | **4-Bromophenylthiourea** | **POS** | **0.000213248** |
| **12557** |  | **POS** | **0.019529757** |
| **12559** |  | **POS** | **0.007992285** |
| **12560** |  | **POS** | **0.00774569** |
| **12561** |  | **POS** | **0.001000962** |
| **12562** |  | **POS** | **4.03836E-05** |
| **12565** | **1,7-diphospho-1-epi-valienol** | **NEG** | **0.000534632** |
| **12572** |  | **NEG** | **0.000955152** |
| **12576** |  | **POS** | **0.030501828** |
| **12578** |  | **NEG** | **0.001819392** |
| **12579** |  | **NEG** | **0.02447392** |
| **12581** |  | **POS** | **0.000320705** |
| **12584** |  | **NEG** | **0.033221409** |
| **12587** |  | **NEG** | **0.011933985** |
| **12588** |  | **NEG** | **0.001497136** |
| **12589** |  | **NEG** | **0.016921098** |
| **12590** | **2'-Fluoro-5-iodoarauracil** | **NEG** | **0.008576627** |
| **12594** |  | **POS** | **3.45287E-06** |
| **12596** |  | **POS** | **0.048685675** |
| **12598** |  | **POS** | **0.030270152** |
| **12599** | **D-Ribose 5-phosphate** | **POS** | **0.032354416** |
| **12600** |  | **POS** | **0.040471842** |
| **12601** |  | **POS** | **0.004224124** |
| **12602** |  | **POS** | **0.005686091** |
| **12605** |  | **POS** | **0.04393562** |
| **12610** | **Adenine monophosphate** | **POS** | **0.014739383** |
| **12612** |  | **POS** | **0.037566477** |
| **12617** |  | **NEG** | **0.020306192** |
| **12621** |  | **NEG** | **0.000367943** |
| **12624** |  | **POS** | **0.040970638** |
| **12637** |  | **NEG** | **0.011751393** |
| **12638** |  | **NEG** | **0.013588256** |
| **12640** |  | **NEG** | **0.000543525** |
| **12656** |  | **POS** | **0.025424405** |
| **12657** |  | **NEG** | **0.021437299** |
| **12661** |  | **POS** | **0.00186308** |
| **12662** |  | **POS** | **0.049546188** |
| **12663** |  | **NEG** | **0.030724104** |
| **12666** | **Decyl oleate** | **POS** | **0.036338629** |
| **12667** |  | **POS** | **0.01428846** |
| **12669** |  | **POS** | **0.006420722** |
| **12670** |  | **NEG** | **0.000589954** |
| **12675** |  | **POS** | **0.006089187** |
| **12685** |  | **NEG** | **9.71275E-05** |
| **12686** | **Iodothyronine sulfate** | **NEG** | **0.003648109** |
| **12688** |  | **NEG** | **0.037871991** |
| **12693** |  | **NEG** | **0.000330931** |
| **12694** |  | **NEG** | **0.023557379** |
| **12697** | **2,3,4,5,6-Pentafluorobenzamide** | **POS** | **0.003869895** |
| **12699** |  | **POS** | **0.017961316** |
| **12703** | **Alendronic acid** | **NEG** | **0.000234099** |
| **12706** |  | **POS** | **0.004016182** |
| **12708** |  | **POS** | **0.000984081** |
| **12710** | **TETRASUL** | **POS** | **0.00584608** |
| **12729** | **Cer(d18:2(4E,14Z)/22:6(5Z,8E,10Z,13Z,15E,19Z)-2OH(7S, 17S))** | **POS** | **0.013006082** |
| **12734** |  | **NEG** | **0.001980754** |
| **12735** | **xi-3-Methylpentacosane** | **POS** | **0.010712658** |
| **12740** |  | **NEG** | **0.029663276** |
| **12741** |  | **NEG** | **0.001299441** |
| **12742** |  | **NEG** | **0.018760001** |
| **12746** |  | **POS** | **0.00399404** |
| **12747** |  | **POS** | **0.008059474** |
| **12761** |  | **NEG** | **0.000480935** |
| **12764** |  | **POS** | **2.98956E-06** |
| **12768** |  | **POS** | **0.042608592** |
| **12769** | **Chlormerodrin** | **POS** | **0.016606867** |
| **12773** |  | **NEG** | **0.004319878** |
| **12774** | **trans-Zeatin riboside triphosphate** | **POS** | **0.007316613** |
| **12784** |  | **POS** | **0.032133986** |
| **12795** |  | **NEG** | **0.004906647** |
| **12796** | **2-Maleylacetate** | **NEG** | **0.020556889** |
| **12798** |  | **NEG** | **0.015930757** |
| **12802** |  | **NEG** | **0.0110005** |
| **12803** |  | **NEG** | **0.007643192** |
| **12804** |  | **NEG** | **4.17103E-05** |
| **12805** |  | **NEG** | **0.012363638** |
| **12806** |  | **NEG** | **0.006525037** |
| **12808** | **4-(4-Hydroxy-3-isopropylphenoxy)-3,5-diiodophenylacetic acid** | **NEG** | **0.036140634** |
| **12812** |  | **POS** | **0.011025365** |
| **12814** |  | **NEG** | **0.039236193** |
| **12817** |  | **NEG** | **0.007189448** |
| **12826** |  | **NEG** | **0.033138791** |
| **12829** |  | **POS** | **0.001670432** |
| **12847** |  | **POS** | **0.017611438** |
| **12848** |  | **POS** | **0.008005353** |
| **12849** |  | **POS** | **0.032020555** |
| **12853** | **1D-myo-Inositol 1,3,4,5-tetrakisphosphate** | **POS** | **0.000600393** |
| **12856** |  | **NEG** | **0.017482583** |
| **12858** |  | **NEG** | **0.049100557** |
| **12863** |  | **POS** | **0.006439427** |
| **12869** |  | **POS** | **0.02623336** |
| **12870** |  | **POS** | **0.011380099** |
| **12871** |  | **POS** | **0.028028053** |
| **12873** |  | **NEG** | **0.008727782** |
| **12874** |  | **NEG** | **0.006003405** |
| **12877** |  | **NEG** | **0.005501315** |
| **12881** |  | **NEG** | **0.029560644** |
| **12886** |  | **NEG** | **0.008823612** |
| **12887** |  | **NEG** | **0.000819007** |
| **12890** |  | **NEG** | **0.033092691** |
| **12895** | **4-amino-2-methyl-5-diphosphomethylpyrimidine** | **NEG** | **0.024950858** |
| **12899** |  | **POS** | **0.008980563** |
| **12900** |  | **POS** | **0.00719079** |
| **12904** | **uric acid oxalate** | **POS** | **0.043269133** |
| **12907** |  | **POS** | **0.000425077** |
| **12913** |  | **POS** | **0.014068222** |
| **12915** |  | **POS** | **0.003731088** |
| **12918** |  | **POS** | **0.012343157** |
| **12919** |  | **POS** | **0.00794018** |
| **12920** |  | **NEG** | **0.001501404** |
| **12923** |  | **POS** | **0.037164447** |
| **12925** |  | **POS** | **0.020313431** |
| **12929** |  | **POS** | **0.04764619** |
| **12930** |  | **POS** | **0.01966059** |
| **12934** |  | **POS** | **0.002930519** |
| **12938** |  | **NEG** | **0.027104726** |
| **12939** |  | **NEG** | **0.004409274** |
| **12940** | **Iron naphthenate** | **NEG** | **0.014787314** |
| **12941** |  | **NEG** | **0.017806818** |
| **12947** |  | **NEG** | **0.008494086** |
| **12948** |  | **NEG** | **0.01739776** |
| **12950** |  | **POS** | **0.00111086** |
| **12951** |  | **POS** | **0.012300333** |
| **12954** | **Methazole** | **NEG** | **0.000217607** |
| **12961** |  | **POS** | **0.001675997** |
| **12965** |  | **POS** | **0.002392679** |
| **12968** |  | **POS** | **0.000661796** |
| **12978** |  | **POS** | **0.005810589** |
| **12979** |  | **POS** | **0.004075697** |
| **12981** | **Chlomethoxyfen** | **POS** | **0.022842908** |
| **12983** |  | **NEG** | **0.000275167** |
| **12986** | **N-[[(2S,3S,4R,5R)-3,4-Dihydroxy-5-[6-[(3-iodophenyl)methylamino]purin-9-yl]oxolan-2-yl]-hydroxymethyl]-N-methylformamide** | **POS** | **9.80793E-05** |
| **12990** | **Citreovirone** | **NEG** | **0.001009889** |
| **12991** | **Chloramphenicol succite** | **NEG** | **0.000310621** |
| **12992** |  | **POS** | **0.044655441** |
| **12998** | **Chloramphenicol sodium succite** | **NEG** | **6.07652E-05** |
| **12999** |  | **NEG** | **0.044785429** |
| **13002** |  | **POS** | **0.04728452** |
| **13009** | **Chloramphenicol succite** | **POS** | **0.022082917** |
| **13010** |  | **POS** | **0.027043607** |
| **13011** |  | **POS** | **0.000152239** |
| **13012** | **5'-Guanylylmethylenebisphosphote** | **POS** | **0.029039607** |
| **13026** |  | **NEG** | **9.50905E-05** |
| **13031** |  | **POS** | **0.017321888** |
| **13032** |  | **POS** | **0.00778106** |
| **13036** |  | **NEG** | **0.015007448** |
| **13037** |  | **NEG** | **0.00711696** |
| **13040** |  | **NEG** | **0.008282153** |
| **13041** |  | **NEG** | **0.026203581** |
| **13042** |  | **NEG** | **0.010175121** |
| **13048** |  | **NEG** | **0.020482997** |
| **13050** |  | **POS** | **0.000280672** |
| **13052** |  | **NEG** | **0.006075125** |
| **13053** | **(2R,3R,4S,5R)-5-Fluoro-2,3,4-trihydroxy-6-oxohexyl dihydrogen phosphate** | **NEG** | **0.00049336** |
| **13054** |  | **NEG** | **0.016779238** |
| **13056** |  | **NEG** | **0.004042816** |
| **13058** |  | **POS** | **0.000478185** |
| **13059** |  | **POS** | **0.000260223** |
| **13061** | **4,11-Dichloro-5,12-dihydroquino[2,3-b]acridine-7,14-dione** | **POS** | **0.002983271** |
| **13069** |  | **POS** | **0.01150795** |
| **13070** |  | **POS** | **0.008606782** |
| **13073** |  | **POS** | **0.006808884** |
| **13074** |  | **POS** | **0.023794566** |
| **13075** |  | **POS** | **0.016429772** |
| **13081** | **Urate D-ribonucleotide** | **POS** | **0.005369164** |
| **13085** |  | **POS** | **0.015774535** |
| **13087** |  | **NEG** | **0.002113704** |
| **13092** |  | **NEG** | **0.004903482** |
| **13096** |  | **NEG** | **0.010509522** |
| **13097** |  | **NEG** | **0.000193789** |
| **13104** |  | **NEG** | **0.001630442** |
| **13107** |  | **NEG** | **0.000793153** |
| **13111** |  | **NEG** | **0.007210805** |
| **13113** |  | **POS** | **0.000315862** |
| **13114** |  | **POS** | **0.015570573** |
| **13115** | **(2R,3R,4S,5R)-5-Fluoro-2,3,4-trihydroxy-6-oxohexyl dihydrogen phosphate** | **POS** | **0.006616495** |
| **13126** | **2-(Trifluoromethoxy)anisole** | **POS** | **0.003372689** |
| **13135** | **Erythromycin ethylsuccite** | **POS** | **0.031127956** |
| **13140** |  | **NEG** | **0.0003912** |
| **13143** |  | **NEG** | **0.004677385** |
| **13145** |  | **POS** | **0.024567381** |
| **13148** |  | **POS** | **0.014752493** |
| **13155** | **3-(Phosphoacetylamido)-L-alanine** | **NEG** | **0.012831502** |
| **13159** |  | **NEG** | **0.000117375** |
| **13160** |  | **NEG** | **1.95765E-05** |
| **13161** |  | **NEG** | **0.016205625** |
| **13162** |  | **NEG** | **2.85527E-05** |
| **13163** |  | **NEG** | **3.81415E-05** |
| **13164** |  | **NEG** | **3.74246E-05** |
| **13165** |  | **NEG** | **1.33919E-05** |
| **13166** |  | **NEG** | **0.002151141** |
| **13167** |  | **NEG** | **0.011264693** |
| **13171** |  | **NEG** | **0.002766331** |
| **13173** | **3,3,4,4,5,5,6,6,7,7,8,8,8-Tridecafluorooctan-1-ol** | **NEG** | **0.016678464** |
| **13174** |  | **NEG** | **0.001982056** |
| **13175** |  | **NEG** | **0.000980478** |
| **13176** |  | **NEG** | **0.001525029** |
| **13177** |  | **NEG** | **0.001633998** |
| **13178** |  | **NEG** | **0.002320117** |
| **13179** |  | **NEG** | **0.000518635** |
| **13180** |  | **NEG** | **3.6455E-05** |
| **13181** |  | **NEG** | **8.53887E-06** |
| **13182** |  | **NEG** | **0.002119492** |
| **13183** |  | **NEG** | **0.000180132** |
| **13184** |  | **NEG** | **0.002288074** |
| **13185** | **2,5,6-Tribromo-1-methylgramine** | **NEG** | **5.4505E-06** |
| **13186** |  | **NEG** | **0.002943198** |
| **13187** |  | **NEG** | **6.12521E-05** |
| **13188** | **Sporidesmin J** | **NEG** | **6.76577E-06** |
| **13189** | **Loperamide oxide** | **NEG** | **0.000536369** |
| **13191** |  | **NEG** | **6.5735E-05** |
| **13192** |  | **NEG** | **7.67789E-06** |
| **13193** |  | **NEG** | **0.001876526** |
| **13194** |  | **NEG** | **0.040154436** |
| **13195** |  | **NEG** | **8.35902E-05** |
| **13196** |  | **NEG** | **0.016303554** |
| **13197** | **PA(20:3(5Z,8Z,11Z)/24:1(15Z))** | **NEG** | **0.008384062** |
| **13198** | **PG(20:3(5Z,8Z,11Z)/20:3(5Z,8Z,11Z))** | **NEG** | **0.018273156** |
| **13202** |  | **NEG** | **4.50826E-05** |
| **13203** |  | **NEG** | **2.0288E-05** |
| **13204** |  | **NEG** | **1.97232E-05** |
| **13206** |  | **NEG** | **6.98896E-05** |
| **13209** |  | **NEG** | **0.000197755** |
| **13210** |  | **NEG** | **0.000422931** |
| **13211** | **Revexepride** | **NEG** | **0.00152977** |
| **13212** |  | **NEG** | **0.003296252** |
| **13213** |  | **NEG** | **4.9134E-06** |
| **13215** |  | **NEG** | **0.012472607** |
| **13216** |  | **POS** | **0.048937739** |
| **13217** |  | **NEG** | **2.19441E-05** |
| **13219** |  | **NEG** | **2.83876E-05** |
| **13220** |  | **NEG** | **0.000127009** |
| **13221** |  | **NEG** | **0.000278183** |
| **13224** | **Ethyl 2-(5-(4-chlorophenyl)pentyl)oxiran-2-carboxylate** | **POS** | **0.00183921** |
| **13225** |  | **POS** | **0.000385605** |
| **13226** |  | **POS** | **0.0002007** |
| **13227** |  | **POS** | **4.88952E-05** |
| **13228** |  | **POS** | **7.03997E-05** |
| **13232** |  | **POS** | **0.016112647** |
| **13233** | **(8R,9S,13S,14S,17S)-17-Benzyl-13-methyl-7,8,9,11,12,14,15,16-octahydro-6H-cyclopenta[a]phenanthrene-3,17-diol** | **POS** | **0.040121867** |
| **13235** |  | **POS** | **0.044359943** |
| **13237** | **Azocyclotin** | **POS** | **0.000567165** |
| **13238** |  | **NEG** | **7.75691E-06** |
| **13241** |  | **NEG** | **2.68304E-05** |
| **13244** |  | **POS** | **0.003765892** |
| **13246** |  | **POS** | **0.008925232** |
| **13248** |  | **POS** | **0.003312988** |
| **13249** |  | **POS** | **4.2016E-05** |
| **13255** |  | **POS** | **0.004244072** |
| **13256** | **Depropionylbezitramide** | **POS** | **0.034730866** |
| **13257** | **EXP 3174** | **POS** | **0.00246283** |
| **13261** |  | **NEG** | **0.026926979** |
| **13262** |  | **NEG** | **0.003538632** |
| **13263** |  | **NEG** | **0.000559813** |
| **13264** |  | **NEG** | **0.003018403** |
| **13267** |  | **POS** | **0.01717921** |
| **13270** |  | **POS** | **0.02716448** |
| **13274** |  | **POS** | **0.004125547** |
| **13281** |  | **NEG** | **0.001578922** |
| **13288** |  | **NEG** | **0.000523987** |
| **13290** |  | **NEG** | **0.000152751** |
| **13292** |  | **NEG** | **0.03140446** |
| **13295** |  | **POS** | **0.004488508** |
| **13299** |  | **NEG** | **0.013726265** |
| **13302** |  | **NEG** | **0.004259606** |
| **13303** |  | **NEG** | **0.008080201** |
| **13316** | **PE-NMe(18:0/22:5(4Z,7Z,10Z,13Z,16Z))** | **NEG** | **0.00025019** |
| **13319** |  | **POS** | **0.030674638** |
| **13324** |  | **POS** | **0.000799641** |
| **13327** | **Iprodione** | **POS** | **0.020302555** |
| **13328** | **Taxa-4(20),11(12)-dien-5alpha-yl acetate** | **POS** | **0.023123352** |
| **13329** |  | **POS** | **0.030247703** |
| **13333** | **PE(22:0/P-18:1(11Z))** | **POS** | **0.047242252** |
| **13339** |  | **NEG** | **0.014093992** |
| **13340** | **PC(18:0/24:0)** | **NEG** | **0.037041477** |
| **13350** | **Formimidoyl-fortimicin A** | **POS** | **0.027803745** |
| **13355** | **4'-Hydroxy Aceclofenac** | **NEG** | **0.000584188** |
| **13359** | **ndrolone decanoate** | **POS** | **0.025835734** |
| **13360** |  | **NEG** | **7.37338E-05** |
| **13363** |  | **NEG** | **0.009870622** |
| **13366** |  | **NEG** | **0.005615157** |
| **13367** | **Fipronil** | **NEG** | **0.017008946** |
| **13378** |  | **NEG** | **0.004193717** |
| **13381** | **3-Methyleneoxindole** | **POS** | **0.001712441** |
| **13387** |  | **POS** | **0.009942833** |
| **13395** |  | **NEG** | **0.03355141** |
| **13400** |  | **POS** | **0.028472039** |
| **13401** |  | **POS** | **0.013468284** |
| **13407** |  | **NEG** | **0.008724805** |
| **13408** | **Formimidoyl-fortimicin A** | **NEG** | **0.001639881** |
| **13415** | **8-Azido-cyclic AMP** | **POS** | **0.020868347** |
| **13438** | **S-(1,2-Dichlorovinyl)glutathione** | **POS** | **0.024363296** |
| **13444** |  | **NEG** | **0.021550008** |
| **13453** |  | **NEG** | **0.033462999** |
| **13456** | **Istamycin C1** | **NEG** | **0.020173267** |
| **13460** | **Erythromycin ethylsuccite** | **NEG** | **0.010631049** |
| **13466** |  | **POS** | **0.021725466** |
| **13467** |  | **POS** | **0.012601755** |
| **13468** |  | **NEG** | **0.022238432** |
| **13470** |  | **POS** | **0.001671877** |
| **13472** |  | **POS** | **0.003107393** |
| **13475** |  | **POS** | **0.009704097** |
| **13477** |  | **NEG** | **0.031010515** |
| **13482** |  | **NEG** | **0.020413785** |
| **13485** |  | **NEG** | **0.003771876** |
| **13493** |  | **NEG** | **0.008952814** |
| **13496** | **Alginic acid** | **NEG** | **0.034144337** |
| **13497** |  | **NEG** | **0.004241641** |
| **13501** | **Neuromedin N** | **NEG** | **0.025316229** |
| **13502** |  | **NEG** | **0.030381164** |
| **13504** |  | **NEG** | **0.036755705** |
| **13508** |  | **POS** | **0.002172698** |
| **13514** |  | **POS** | **0.00458465** |
| **13516** |  | **POS** | **0.003747424** |
| **13517** | **Disodium guanylate** | **POS** | **0.025790908** |
| **13519** |  | **POS** | **0.02296741** |
| **13521** | **Laserpitin** | **POS** | **0.009240766** |
| **13522** |  | **POS** | **0.015508683** |
| **13526** |  | **NEG** | **0.014407326** |
| **13531** |  | **POS** | **0.035319033** |
| **13532** |  | **POS** | **0.003771637** |
| **13535** |  | **POS** | **0.00012041** |
| **13543** |  | **NEG** | **0.011323599** |
| **13546** | **3-Deoxy-D-manno-octulosote 8-phosphate** | **NEG** | **0.01645739** |
| **13548** |  | **NEG** | **0.000947379** |
| **13551** |  | **POS** | **0.009806995** |
| **13553** |  | **POS** | **0.003768609** |
| **13556** |  | **NEG** | **0.011805621** |
| **13565** | **PA(10:0/PGE2)** | **NEG** | **0.008464793** |
| **13566** |  | **NEG** | **0.01920507** |
| **13567** |  | **NEG** | **0.020488777** |
| **13568** |  | **NEG** | **0.007751474** |
| **13571** | **Chloramphenicol glucuronide** | **POS** | **0.000409747** |
| **13580** |  | **POS** | **0.029293781** |
| **13582** | **Adonixanthin** | **POS** | **0.026407342** |
| **13585** |  | **POS** | **0.003933435** |
| **13586** |  | **POS** | **0.035068474** |
| **13587** |  | **POS** | **0.02646496** |
| **13590** |  | **POS** | **0.002035904** |
| **13591** |  | **POS** | **0.01467155** |
| **13597** |  | **POS** | **0.015571224** |
| **13622** |  | **NEG** | **0.002421399** |
| **13623** |  | **NEG** | **0.021807981** |
| **13630** | **1-Naphthyl phosphate** | **POS** | **0.0125494** |
| **13632** |  | **POS** | **0.000308237** |
| **13633** | **Methyl 3,5-dinitrobenzoate** | **POS** | **0.007243582** |
| **13635** |  | **POS** | **0.018938397** |
| **13636** |  | **POS** | **0.017211483** |
| **13639** |  | **POS** | **0.023889198** |
| **13640** |  | **POS** | **0.000911129** |
| **13641** | **Thiobinupharidine** | **POS** | **0.005469073** |
| **13642** |  | **POS** | **0.010055904** |
| **13644** | **Benoxacor** | **NEG** | **0.048665902** |
| **13645** | **2-Dehydro-3-deoxy-D-arabino-heptote 7-phosphate** | **NEG** | **0.008508203** |
| **13648** |  | **POS** | **0.01429786** |
| **13652** |  | **NEG** | **0.000401454** |
| **13657** |  | **NEG** | **0.019765381** |
| **13658** |  | **NEG** | **0.000999222** |
| **13666** | **D-Fructose 6-phosphate** | **NEG** | **7.93711E-06** |
| **13668** |  | **NEG** | **0.029500402** |
| **13669** |  | **NEG** | **0.000792721** |
| **13680** | **Bromethalin** | **NEG** | **0.047101397** |
| **13683** | **DG(20:3(5Z,8Z,11Z)/24:1(15Z)/0:0)** | **NEG** | **0.021584755** |
| **13684** | **Carzelesin** | **NEG** | **0.000376198** |
| **13686** |  | **NEG** | **0.002005055** |
| **13689** | **3-methoxy-4-hydroxy-5-all-trans-nonaprenylbenzoate** | **NEG** | **0.011141571** |
| **13691** | **Phosphocreatinine** | **POS** | **0.000998736** |
| **13692** |  | **POS** | **0.007988762** |
| **13701** |  | **POS** | **0.006628594** |
| **13702** |  | **POS** | **0.016875023** |
| **13704** | **Aliskiren** | **POS** | **0.032231988** |
| **13705** |  | **POS** | **0.012945289** |
| **13706** | **Caged insp3** | **POS** | **0.032770263** |
| **13708** |  | **POS** | **0.031327093** |
| **13709** | **1-Palmitoyl-2-linoleoyl-3-acetyl-rac-glycerol** | **POS** | **0.011598881** |
| **13710** |  | **NEG** | **0.005006672** |
| **13711** |  | **POS** | **0.040622475** |
| **13712** |  | **POS** | **0.020974755** |
| **13713** | **Phosphocreatinine** | **NEG** | **0.000779958** |
| **13717** |  | **NEG** | **0.000159305** |
| **13719** |  | **NEG** | **0.017409886** |
| **13726** |  | **POS** | **0.001763686** |
| **13728** |  | **POS** | **0.000331725** |
| **13730** |  | **POS** | **0.008753771** |
| **13732** |  | **POS** | **0.009332344** |
| **13735** | **Chlorfenprop-methyl** | **NEG** | **0.009458873** |
| **13741** |  | **NEG** | **0.004144255** |
| **13742** | **6-Oxo-2-hydroxy-7-(4'-chlorophenyl)-3,8,8-trichloroocta-2E,4E,7E-trienoate** | **NEG** | **0.03369896** |
| **13745** |  | **NEG** | **0.028579957** |
| **13748** |  | **POS** | **0.005449431** |
| **13751** |  | **POS** | **0.02335344** |
| **13764** | **3-Cyclobutene-1,2-dione, 3-((3-(3-(4-(5-methoxy-4-pyrimidinyl)-1-piperazinyl)propyl)-1H-indol-5-yl)amino)-4-methyl-** | **POS** | **0.027684646** |
| **13765** | **UDP-L-Ara4N** | **POS** | **0.018301191** |
| **13767** |  | **POS** | **0.018386935** |
| **13768** |  | **POS** | **0.002421157** |
| **13769** |  | **POS** | **0.005607153** |
| **13771** |  | **NEG** | **0.000829544** |
| **13776** |  | **NEG** | **0.047646051** |
| **13780** |  | **NEG** | **0.000255919** |
| **13782** |  | **NEG** | **0.012730146** |
| **13783** | **3-Sulfopyruvate** | **POS** | **0.00100803** |
| **13784** |  | **POS** | **0.000733654** |
| **13786** | **2-Furylmercury chloride** | **POS** | **0.0001747** |
| **13793** |  | **POS** | **0.000531075** |
| **13795** |  | **POS** | **0.0220736** |
| **13800** |  | **POS** | **0.017277731** |
| **13807** | **Chloramphenicol glucuronide** | **NEG** | **0.004655844** |
| **13813** |  | **NEG** | **0.000390889** |
| **13818** |  | **NEG** | **0.003298483** |
| **13821** |  | **NEG** | **0.011382753** |
| **13833** |  | **POS** | **0.015781497** |
| **13837** | **Theacitrin A** | **POS** | **0.04077817** |
| **13841** | **PA(a-25:0/i-24:0)** | **POS** | **0.017068621** |
| **13842** |  | **POS** | **0.0487208** |
| **13843** | **3-trans,5-cis-Octadienoyl-CoA** | **POS** | **0.030935206** |
| **13845** | **PE-NMe2(20:0/24:0)** | **POS** | **0.01657374** |
| **13847** |  | **POS** | **0.04762284** |
| **13849** |  | **POS** | **0.0446724** |
| **13850** |  | **POS** | **0.013295886** |
| **13853** |  | **NEG** | **0.032089394** |
| **13854** |  | **POS** | **0.024948238** |
| **13857** | **Demethylmacrocin** | **POS** | **0.022867883** |
| **13861** | **1,2-Bis-O-sipoyl-beta-D-glucoside** | **NEG** | **0.018590223** |
| **13871** | **Furilazole** | **NEG** | **0.032601905** |
| **13874** | **Chlorpyrifos** | **NEG** | **0.020778895** |
| **13876** |  | **NEG** | **0.009321536** |
| **13877** | **(13Z,16Z)-Docosadienoylcarnitine** | **NEG** | **0.021744489** |
| **13878** | **Phosphoaminophosphonic acid-adenylate ester** | **NEG** | **0.004816598** |
| **13880** | **DG(12:0/20:4(6Z,8E,10E,14Z)-2OH(5S,12R)/0:0)** | **NEG** | **0.036411975** |
| **13883** |  | **NEG** | **0.002699134** |
| **13888** |  | **POS** | **0.002040052** |
| **13890** | **Sodium stearyl fumarate** | **POS** | **0.022111094** |
| **13891** |  | **POS** | **0.035599054** |
| **13894** | **Abiraterone sulfate** | **POS** | **0.019187893** |
| **13895** |  | **POS** | **0.040500257** |
| **13897** |  | **POS** | **0.001428113** |
| **13901** |  | **POS** | **0.010756259** |
| **13905** |  | **POS** | **0.036335867** |
| **13907** |  | **NEG** | **0.026545811** |
| **13913** | **Deltamethrin** | **NEG** | **0.00287866** |
| **13917** |  | **POS** | **0.016244337** |
| **13919** |  | **POS** | **0.016438829** |
| **13920** |  | **POS** | **3.02163E-05** |
| **13921** |  | **POS** | **0.004887391** |
| **13922** |  | **POS** | **0.023394336** |
| **13925** |  | **NEG** | **0.001898718** |
| **13926** |  | **NEG** | **0.040643158** |
| **13933** |  | **NEG** | **0.016670811** |
| **13938** |  | **NEG** | **0.024821558** |
| **13939** |  | **POS** | **0.004092424** |
| **13940** |  | **POS** | **0.018673842** |
| **13946** | **Phosphophosphite** | **POS** | **0.004186951** |
| **13947** | **6-Phospho-D-glucote** | **POS** | **0.001447068** |
| **13949** |  | **POS** | **0.004557012** |
| **13952** |  | **POS** | **0.003488613** |
| **13954** | **Deltamethrin** | **POS** | **0.007524684** |
| **13955** | **Phosphoaminophosphonic acid-adenylate ester** | **POS** | **0.008186917** |
| **13959** |  | **POS** | **0.018889378** |
| **13960** |  | **POS** | **0.046785241** |
| **13967** |  | **NEG** | **0.009241995** |
| **13968** |  | **POS** | **0.002605361** |
| **13972** |  | **NEG** | **2.11959E-06** |
| **13974** |  | **NEG** | **0.003064815** |
| **13975** |  | **NEG** | **0.016705441** |
| **13976** |  | **NEG** | **0.008996585** |
| **13978** |  | **NEG** | **0.004320825** |
| **13979** |  | **NEG** | **0.000461985** |
| **13990** |  | **NEG** | **0.021048355** |
| **13993** | **6-methoxy-3-methyl-2-all-trans-decaprenyl-1,4-benzoquinol** | **NEG** | **0.006795459** |
| **13994** |  | **POS** | **0.033580115** |
| **13995** | **Pentafluorobenzaldehyde** | **POS** | **0.002932877** |
| **13997** | **7,8-Dihydroneopterin 2',3'-cyclic phosphate** | **POS** | **0.02410064** |
| **13998** |  | **POS** | **0.019060388** |
| **13999** | **Octachlorostyrene** | **POS** | **0.008609778** |
| **14000** |  | **POS** | **0.03836738** |
| **14004** |  | **POS** | **0.004665784** |
| **14005** |  | **POS** | **0.02353663** |
| **14009** |  | **POS** | **0.000887905** |
| **14010** | **(8R,9S,13S,14S,17S)-17-Benzyl-13-methyl-7,8,9,11,12,14,15,16-octahydro-6H-cyclopenta[a]phenanthrene-3,17-diol** | **POS** | **0.006269173** |
| **14012** | **Thiencynonate** | **POS** | **0.003124595** |
| **14013** |  | **POS** | **0.044288704** |
| **14018** | **Hexacosanal** | **POS** | **0.01287981** |
| **14022** | **Jervine** | **NEG** | **0.01294461** |
| **14028** |  | **NEG** | **0.032622434** |
| **14034** |  | **NEG** | **0.012765176** |
| **14035** |  | **POS** | **0.03682958** |
| **14038** | **Urate D-ribonucleotide** | **POS** | **0.008648364** |
| **14039** | **Dextromoramide** | **POS** | **0.01614155** |
| **14042** |  | **POS** | **0.005542952** |
| **14044** |  | **POS** | **0.006091599** |
| **14046** |  | **NEG** | **0.020653133** |
| **14052** |  | **NEG** | **0.023432407** |
| **14053** |  | **POS** | **0.031380168** |
| **14054** |  | **POS** | **0.046204936** |
| **14057** |  | **NEG** | **0.00156992** |
| **14058** |  | **NEG** | **0.001002047** |
| **14067** |  | **NEG** | **0.002758933** |
| **14068** |  | **NEG** | **0.012223815** |
| **14069** | **5-Hydroxyisourate** | **NEG** | **0.001055373** |
| **14070** |  | **NEG** | **0.000328656** |
| **14080** |  | **NEG** | **0.048425275** |
| **14082** |  | **NEG** | **0.021168302** |
| **14083** | **Cycloguanil pamoate** | **NEG** | **0.047505214** |
| **14084** | **Sennoside E** | **NEG** | **0.009209287** |
| **14085** |  | **POS** | **0.010616843** |
| **14090** |  | **POS** | **0.002873475** |
| **14091** |  | **POS** | **0.000322381** |
| **14093** |  | **POS** | **0.037717315** |
| **14102** |  | **POS** | **0.005209565** |
| **14103** |  | **POS** | **0.049634103** |
| **14104** |  | **POS** | **0.044340164** |
| **14106** | **Silafluofen** | **NEG** | **0.0293061** |
| **14107** |  | **POS** | **0.008426614** |
| **14109** |  | **NEG** | **0.03383202** |
| **14111** |  | **NEG** | **0.00867564** |
| **14112** |  | **POS** | **0.03901484** |
| **14116** | **BUTAPERAZINE** | **NEG** | **0.022484788** |
| **14118** |  | **NEG** | **0.038699685** |
| **14119** |  | **NEG** | **0.040662056** |
| **14121** |  | **NEG** | **0.022973087** |
| **14123** | **Maytansine** | **NEG** | **0.047789134** |
| **14126** |  | **POS** | **0.01115413** |
| **14129** |  | **POS** | **0.000316052** |
| **14130** |  | **POS** | **0.001525672** |
| **14131** |  | **POS** | **0.020843656** |
| **14132** |  | **POS** | **0.034840026** |
| **14135** |  | **POS** | **0.000480515** |
| **14136** | **Nitroimidazo-oxazine** | **POS** | **0.000470274** |
| **14138** |  | **POS** | **0.016518232** |
| **14145** | **Kuwanone G** | **NEG** | **0.022109425** |
| **14149** |  | **NEG** | **0.013768205** |
| **14150** |  | **NEG** | **0.02687944** |
| **14153** | **15beta-Hydroxy-7alpha-mercapto-pregn-4-ene-3,20-dione 7-acetate** | **POS** | **0.020565429** |
| **14156** |  | **NEG** | **0.03277193** |
| **14163** | **Chlorin E6** | **NEG** | **0.014604939** |
| **14169** |  | **POS** | **0.01783673** |
| **14170** |  | **POS** | **0.011626274** |
| **14171** | **6-Feruloylglucose 2,3,4-trihydroxy-3-methylbutylglycoside** | **POS** | **0.025738717** |
| **14173** |  | **POS** | **0.023112288** |
| **14174** |  | **NEG** | **0.030352647** |
| **14181** |  | **POS** | **0.000168081** |
| **14186** |  | **POS** | **0.003635967** |
| **14193** |  | **POS** | **0.000267151** |
| **14195** | **DG(8:0/18:1(12Z)-O(9S,10R)/0:0)** | **POS** | **0.003727312** |
| **14198** |  | **NEG** | **0.006794986** |
| **14201** |  | **NEG** | **0.036398241** |
| **14203** | **Bluensidine 6-phosphate** | **NEG** | **0.033999934** |
| **14216** |  | **POS** | **0.038849733** |
| **14221** |  | **POS** | **0.004315867** |
| **14227** |  | **POS** | **0.017711673** |
| **14228** | **1-(3,4-Dichlorophenyl)urea** | **NEG** | **0.003488694** |
| **14230** |  | **NEG** | **0.006072059** |
| **14239** |  | **NEG** | **0.031015733** |
| **14241** |  | **NEG** | **0.042749208** |
| **14242** |  | **POS** | **0.026135737** |
| **14243** |  | **POS** | **0.011785649** |
| **14247** |  | **POS** | **0.001496319** |
| **14248** |  | **POS** | **0.005388327** |
| **14249** |  | **POS** | **0.017756039** |
| **14255** |  | **NEG** | **0.01150552** |
| **14257** | **Hexafluoroacetylacetone** | **NEG** | **0.014754448** |
| **14264** |  | **NEG** | **0.011815701** |
| **14265** |  | **NEG** | **0.042319171** |
| **14268** |  | **NEG** | **0.033858466** |
| **14275** |  | **POS** | **0.025122082** |
| **14278** |  | **NEG** | **0.029888428** |
| **14285** |  | **NEG** | **0.012459128** |
| **14286** |  | **NEG** | **0.003345073** |
| **14299** |  | **POS** | **0.009480325** |
| **14300** |  | **POS** | **0.021680008** |
| **14301** |  | **POS** | **0.0319273** |
| **14302** | **CDP** | **POS** | **0.022092442** |
| **14303** |  | **POS** | **0.015084169** |
| **14305** |  | **NEG** | **0.045705993** |
| **14309** |  | **POS** | **0.03915821** |
| **14322** |  | **POS** | **0.012043433** |
| **14323** | **6,7-Dichloro-3-hydroxy-1,5 dihydro-imidazo[2,1-b]quinazolin-2-one** | **POS** | **0.001901159** |
| **14325** | **2-Amino-5-iodo-6-phenyl-4-pyrimidinone** | **POS** | **0.016054135** |
| **14327** |  | **POS** | **0.036268355** |
| **14331** |  | **POS** | **0.042592795** |
| **14336** |  | **POS** | **0.006745936** |
| **14337** |  | **NEG** | **9.57129E-05** |
| **14339** |  | **POS** | **0.046489439** |
| **14350** |  | **NEG** | **0.00446399** |
| **14353** |  | **POS** | **0.017975185** |
| **14355** |  | **POS** | **0.031306808** |
| **14358** |  | **POS** | **0.039119735** |
| **14360** |  | **NEG** | **0.020769493** |
| **14364** |  | **POS** | **0.035026557** |
| **14366** |  | **POS** | **0.036041242** |
| **14367** |  | **POS** | **0.030639504** |
| **14370** |  | **POS** | **0.032285607** |
| **14372** |  | **POS** | **0.040950695** |
| **14381** |  | **POS** | **0.002790349** |
| **14388** |  | **NEG** | **0.006465215** |
| **14389** |  | **POS** | **0.038401923** |
| **14394** |  | **POS** | **0.001403779** |
| **14396** |  | **POS** | **0.007657677** |
| **14406** |  | **NEG** | **0.000575773** |
| **14409** |  | **POS** | **0.001509095** |
| **14411** |  | **NEG** | **0.006089616** |
| **14412** | **Cytosine** | **POS** | **0.01326983** |
| **14416** |  | **POS** | **0.042187394** |
| **14420** |  | **NEG** | **0.045554013** |
| **14421** |  | **POS** | **0.009459026** |
| **14423** |  | **NEG** | **0.021994086** |
| **14424** |  | **POS** | **0.002693567** |
| **14427** |  | **POS** | **0.013784372** |
| **14441** |  | **POS** | **0.005903545** |
| **14458** |  | **NEG** | **0.00062293** |
| **14460** |  | **POS** | **0.002462115** |
| **14464** |  | **NEG** | **2.19441E-05** |
| **14466** |  | **NEG** | **8.97397E-05** |
| **14467** |  | **POS** | **0.000587625** |
| **14468** |  | **POS** | **0.000197201** |
| **14469** |  | **POS** | **0.004531774** |
| **14475** |  | **POS** | **0.000673411** |
| **14477** |  | **POS** | **0.033258323** |
| **14479** | **ronidazole** | **POS** | **0.001615384** |
| **14481** | **1H-Phosphole** | **POS** | **0.005251289** |
| **14483** |  | **NEG** | **0.035770591** |
| **14485** |  | **POS** | **0.000627208** |
| **14487** |  | **POS** | **0.019293481** |
| **14491** |  | **NEG** | **0.0010184** |
| **14507** |  | **NEG** | **0.04661312** |
| **14508** |  | **NEG** | **0.015518651** |
| **14512** | **Cryolite** | **NEG** | **0.011949608** |
| **14514** |  | **NEG** | **0.010512246** |
| **14516** |  | **POS** | **0.038533571** |
| **14519** |  | **NEG** | **0.021177658** |
| **14521** |  | **POS** | **0.017888847** |
| **14525** | **Bromobenzene** | **POS** | **0.007956546** |
| **14532** |  | **POS** | **0.016544261** |
| **14540** |  | **POS** | **0.042512288** |
| **14543** | **6-Oxo-2-hydroxy-7-(4'-chlorophenyl)-3,8,8-trichloroocta-2E,4E,7E-trienoate** | **NEG** | **0.003508905** |
| **14547** |  | **NEG** | **0.003996372** |
| **14549** |  | **POS** | **0.0008615** |
| **14550** |  | **POS** | **0.019239437** |
| **14553** |  | **POS** | **2.75539E-06** |
| **14554** |  | **NEG** | **0.002649881** |
| **14555** |  | **NEG** | **0.011461276** |
| **14556** |  | **POS** | **0.004152327** |
| **14558** |  | **POS** | **0.012773867** |
| **14559** |  | **NEG** | **0.02232311** |
| **14562** |  | **NEG** | **0.002188514** |
| **14571** | **2,3-Dichloroaniline** | **POS** | **0.000851637** |
| **14576** |  | **NEG** | **2.00739E-05** |
| **14582** | **Propanoyl phosphate** | **POS** | **0.03080935** |
| **14583** | **3-Methyleneoxindole** | **POS** | **0.005740097** |
| **14588** |  | **POS** | **0.002152935** |
| **14593** |  | **POS** | **0.026177358** |
| **14596** |  | **NEG** | **0.007534336** |
| **14597** |  | **POS** | **4.76625E-05** |
| **14601** |  | **NEG** | **7.89319E-05** |
| **14605** |  | **POS** | **0.00112034** |
| **14607** |  | **POS** | **0.024627327** |
| **14613** |  | **NEG** | **0.04198724** |
| **14614** |  | **NEG** | **0.045377026** |
| **14616** |  | **NEG** | **0.007063434** |
| **14618** |  | **POS** | **0.014125079** |
| **14620** | **5-Hydroxyisourate** | **NEG** | **0.019875994** |
| **14623** |  | **NEG** | **0.010076968** |
| **14625** |  | **NEG** | **0.000122192** |
| **14627** |  | **POS** | **0.0005683** |
| **14631** |  | **POS** | **0.001574935** |
| **14632** |  | **NEG** | **0.006090621** |
| **14633** |  | **POS** | **0.034524433** |
| **14635** |  | **NEG** | **0.00438847** |
| **14642** |  | **NEG** | **0.000190657** |
| **14645** |  | **NEG** | **0.000215413** |
| **14646** |  | **NEG** | **0.025268789** |
| **14647** |  | **NEG** | **0.005479536** |
| **14650** |  | **NEG** | **0.004340185** |
| **14651** | **Nornitrogen mustard** | **NEG** | **0.0023773** |
| **14655** |  | **NEG** | **0.015741288** |
| **14659** |  | **POS** | **0.02481146** |
| **14660** |  | **NEG** | **0.008332766** |
| **14661** |  | **NEG** | **0.038018234** |
| **14662** |  | **NEG** | **0.000105585** |
| **14663** |  | **NEG** | **9.42239E-07** |
| **14665** |  | **NEG** | **1.62563E-05** |
| **14666** |  | **NEG** | **0.003458438** |
| **14667** | **Bromisovalum** | **POS** | **0.015265207** |
| **14668** |  | **NEG** | **0.000970207** |
| **14669** | **ronidazole** | **POS** | **0.0035916** |
| **14670** |  | **NEG** | **9.01546E-05** |
| **14672** | **Nitroxinil** | **POS** | **0.015195769** |
| **14673** |  | **POS** | **0.004439806** |
| **14674** |  | **NEG** | **0.042891724** |
| **14680** |  | **POS** | **0.00242123** |
| **14681** |  | **NEG** | **0.000578096** |
| **14682** |  | **NEG** | **0.004122467** |
| **14692** |  | **NEG** | **0.020446295** |
| **14694** |  | **NEG** | **0.001191428** |
| **14695** |  | **NEG** | **0.009053006** |
| **14696** |  | **NEG** | **0.000997494** |
| **14697** | **Naphthoquine** | **NEG** | **0.028623882** |
| **14702** | **Bromacil** | **NEG** | **0.048637901** |
| **14703** | **2,4-Dichlorophenoxyacetate** | **POS** | **0.036173288** |
| **14705** |  | **POS** | **0.022682407** |
| **14706** |  | **NEG** | **0.002060224** |
| **14707** | **(2R)-2-Amino-3-(1,2-dichloroethenylsulfanyl)propanoic acid** | **NEG** | **0.000479516** |
| **14709** |  | **NEG** | **0.000611194** |
| **14712** |  | **NEG** | **0.001111006** |
| **14714** | **Hexafluoroacetone** | **POS** | **0.000245318** |
| **14721** |  | **NEG** | **6.25537E-07** |
| **14723** | **Chiniofon** | **NEG** | **0.039182112** |
| **14725** | **3,3',4,4'-Tetrachloroazobenzene** | **NEG** | **0.000681954** |
| **14729** |  | **NEG** | **0.017190769** |
| **14731** |  | **POS** | **0.038503872** |
| **14733** |  | **NEG** | **6.06551E-05** |
| **14736** |  | **NEG** | **0.00377633** |
| **14741** |  | **NEG** | **0.025210659** |
| **14743** |  | **POS** | **0.031882201** |
| **14745** |  | **NEG** | **0.017941592** |
| **14746** |  | **NEG** | **0.029540531** |
| **14748** | **Carmustine** | **POS** | **0.033411062** |
| **14749** | **lysine phosphoester** | **POS** | **0.025263736** |
| **14750** | **DCI** | **POS** | **0.000176453** |
| **14752** |  | **NEG** | **0.005958967** |
| **14755** |  | **POS** | **0.010467702** |
| **14759** |  | **NEG** | **1.82136E-05** |
| **14761** | **Bromacil** | **POS** | **0.036683706** |
| **14764** |  | **NEG** | **0.00993654** |
| **14765** | **4-Fluorocyclohexane-1-carboxylic acid** | **POS** | **0.007235179** |
| **14768** |  | **POS** | **0.036469717** |
| **14770** |  | **NEG** | **0.019096998** |
| **14773** |  | **NEG** | **0.015965336** |
| **14775** |  | **POS** | **0.047802905** |
| **14778** |  | **NEG** | **0.003440364** |
| **14779** |  | **POS** | **0.020466759** |
| **14782** |  | **POS** | **6.26269E-05** |
| **14788** |  | **NEG** | **0.03056458** |
| **14789** |  | **NEG** | **3.7669E-05** |
| **14791** |  | **POS** | **0.017489026** |
| **14794** |  | **POS** | **0.007883086** |
| **14795** |  | **POS** | **0.006968757** |
| **14797** |  | **NEG** | **0.006380866** |
| **14798** | **Barban** | **NEG** | **0.049940766** |
| **14799** |  | **POS** | **0.040592858** |
| **14805** |  | **NEG** | **0.004151199** |
| **14806** | **cis-Aconitate** | **POS** | **0.009039501** |
| **14809** |  | **POS** | **0.005631878** |
| **14810** |  | **POS** | **0.02984801** |
| **14811** |  | **POS** | **0.000282772** |
| **14812** |  | **POS** | **0.000238663** |
| **14813** |  | **POS** | **0.039484269** |
| **14814** |  | **POS** | **0.040578035** |
| **14816** | **3-Methyleneoxindole** | **POS** | **0.045910371** |
| **14820** |  | **NEG** | **0.022587318** |
| **14822** |  | **POS** | **0.011695424** |
| **14823** |  | **NEG** | **0.002018597** |
| **14826** |  | **POS** | **0.002810483** |
| **14827** |  | **POS** | **0.000208502** |
| **14829** |  | **NEG** | **0.043863093** |
| **14830** |  | **NEG** | **0.002430686** |
| **14834** | **Meclofemate sodium** | **POS** | **0.009442592** |
| **14836** |  | **NEG** | **0.014413713** |
| **14838** | **L-Selenocysteine** | **POS** | **0.027093881** |
| **14840** |  | **NEG** | **0.018189225** |
| **14844** | **2-Phosphoglycolate** | **POS** | **0.001577757** |
| **14847** |  | **NEG** | **0.018196201** |
| **14848** |  | **NEG** | **0.000169552** |
| **14850** |  | **POS** | **0.010371157** |
| **14851** | **Phosphoramide mustard** | **POS** | **0.000104582** |
| **14858** |  | **NEG** | **0.033735929** |
| **14859** |  | **NEG** | **0.010226374** |
| **14860** |  | **POS** | **0.000152524** |
| **14862** | **Rocepafant** | **NEG** | **0.000665733** |
| **14865** |  | **POS** | **0.01815685** |
| **14868** | **2,3-Dichloroaniline** | **POS** | **0.000334202** |
| **14871** |  | **POS** | **0.004621286** |
| **14873** |  | **POS** | **0.000162644** |
| **14874** |  | **NEG** | **0.008991476** |
| **14875** |  | **NEG** | **0.004171094** |
| **14877** |  | **POS** | **0.002290164** |
| **14878** |  | **NEG** | **0.000100431** |
| **14882** |  | **POS** | **0.041964736** |
| **14883** |  | **POS** | **0.01811376** |
| **14884** | **1D-myo-Inositol 1,3,4,5-tetrakisphosphate** | **POS** | **0.005719474** |
| **14889** |  | **NEG** | **0.006097246** |
| **14891** | **Tetracozole** | **NEG** | **0.016393131** |
| **14896** |  | **POS** | **0.012333469** |
| **14898** |  | **NEG** | **0.000625724** |
| **14901** |  | **NEG** | **1.48179E-05** |
| **14902** | **1,2-Difluoro-3,4-dinitrobenzene** | **NEG** | **1.19443E-05** |
| **14903** |  | **NEG** | **0.001196832** |
| **14905** | **beta-D-fructose 2,6-bisphosphate** | **NEG** | **4.62952E-05** |
| **14908** |  | **NEG** | **1.26985E-05** |
| **14910** |  | **POS** | **0.013623112** |
| **14911** |  | **NEG** | **0.011557358** |
| **14913** |  | **POS** | **0.000612888** |
| **14917** |  | **NEG** | **0.000865744** |
| **14919** |  | **NEG** | **0.013877014** |
| **14920** |  | **POS** | **0.000233508** |
| **14921** |  | **POS** | **0.047618297** |
| **14923** | **dCDP** | **NEG** | **2.09199E-05** |
| **14927** |  | **POS** | **0.002700828** |
| **14928** |  | **NEG** | **0.006381844** |
| **14929** |  | **NEG** | **0.000612779** |
| **14931** |  | **POS** | **0.000570969** |
| **14932** |  | **POS** | **0.047427843** |
| **14933** | **[5-(Aminomethyl)furan-3-yl]methyl diphosphate** | **NEG** | **0.038011907** |
| **14937** |  | **POS** | **0.026884909** |
| **14940** |  | **NEG** | **0.017989547** |
| **14945** |  | **NEG** | **0.014034195** |
| **14951** |  | **POS** | **0.001848114** |
| **14953** |  | **NEG** | **0.002311573** |
| **14957** |  | **NEG** | **0.002929418** |
| **14961** |  | **POS** | **0.031270439** |
| **14965** |  | **NEG** | **0.02059364** |
| **14967** |  | **POS** | **0.043229489** |
| **14968** | **5-Chloro-2,4-dihydroxy-6-methyl-3-[(2E,4Z)-3-methyl-5-(1,2,6-trimethyl-3-oxocyclohexyl)penta-2,4-dienyl]benzaldehyde** | **POS** | **0.016478612** |
| **14970** | **Moxifloxacin hydrochloride** | **NEG** | **0.018494636** |
| **14973** |  | **POS** | **0.019489874** |
| **14978** |  | **POS** | **0.049618939** |
| **14982** |  | **NEG** | **0.031477896** |
| **14983** |  | **POS** | **0.002242495** |
| **14989** |  | **NEG** | **0.022382215** |
| **15003** |  | **POS** | **0.032062853** |
| **15009** | **Sporidesmin** | **POS** | **0.00158411** |
| **15012** |  | **POS** | **0.047881639** |
| **15014** |  | **POS** | **0.022091369** |
| **15015** |  | **NEG** | **0.006096872** |
| **15024** |  | **NEG** | **0.012745484** |
| **15025** |  | **POS** | **0.004223411** |
| **15030** |  | **POS** | **0.008188876** |
| **15031** |  | **POS** | **0.006955755** |
| **15033** |  | **POS** | **0.01973806** |
| **15035** |  | **NEG** | **0.003275562** |
| **15038** |  | **NEG** | **0.001430715** |
| **15040** |  | **NEG** | **0.022313775** |
| **15041** |  | **POS** | **0.000904419** |
| **15044** | **Tetratriacontanoic acid** | **POS** | **0.001198722** |
| **15045** |  | **NEG** | **0.040370489** |
| **15048** |  | **POS** | **0.003650979** |
| **15049** |  | **POS** | **0.005065383** |
| **15050** | **D-Fructose 6-phosphate** | **NEG** | **0.008319012** |
| **15053** |  | **POS** | **0.010544983** |
| **15054** |  | **POS** | **0.021789841** |
| **15057** | **alpha-D-xylose 1-phosphate** | **POS** | **0.014687854** |
| **15058** |  | **POS** | **0.017877703** |
| **15059** | **2-(Phosphonomethyl)pentanedioic acid** | **NEG** | **0.018344477** |
| **15060** |  | **POS** | **0.042727821** |
| **15061** |  | **NEG** | **0.004259491** |
| **15063** |  | **POS** | **0.01413532** |
| **15064** |  | **POS** | **0.008873558** |
| **15066** |  | **POS** | **0.009077081** |
| **15069** | **Bromisovalum** | **POS** | **0.009383065** |
| **15071** |  | **NEG** | **0.018584003** |
| **15073** |  | **NEG** | **0.001830603** |
| **15074** |  | **POS** | **0.027132355** |
| **15076** |  | **POS** | **0.000306007** |
| **15077** |  | **POS** | **0.000270496** |
| **15079** | **Citreovirone** | **NEG** | **0.002421877** |
| **15080** |  | **POS** | **0.002208638** |
| **15083** |  | **NEG** | **6.10044E-05** |
| **15085** |  | **NEG** | **0.021564438** |
| **15087** |  | **NEG** | **0.000367814** |
| **15090** |  | **POS** | **0.010588317** |
| **15094** | **Bismuth** | **NEG** | **0.002623067** |
| **15097** | **3,3,5'-Triiodothyronine** | **NEG** | **2.12939E-05** |
| **15098** |  | **POS** | **0.044109448** |
| **15099** |  | **POS** | **0.012422152** |
| **15100** |  | **POS** | **0.003396039** |
| **15101** |  | **POS** | **0.040036834** |
| **15102** |  | **NEG** | **0.002434773** |
| **15103** |  | **POS** | **0.003131541** |
| **15106** |  | **POS** | **0.000401495** |
| **15108** |  | **NEG** | **0.02449789** |
| **15114** |  | **NEG** | **0.008037475** |
| **15119** |  | **NEG** | **0.001735246** |
| **15121** |  | **POS** | **0.030331037** |
| **15122** |  | **POS** | **0.024478848** |
| **15124** |  | **NEG** | **0.003420283** |
| **15125** |  | **NEG** | **0.002459895** |
| **15127** |  | **NEG** | **0.001666888** |
| **15131** |  | **POS** | **0.004613919** |
| **15134** |  | **POS** | **0.014890101** |
| **15135** |  | **POS** | **0.027254739** |
| **15136** |  | **NEG** | **0.001722006** |
| **15137** |  | **POS** | **0.01550392** |
| **15140** | **Adenine monophosphate** | **NEG** | **0.00157009** |
| **15146** | **Thallium sulfate** | **POS** | **0.005826358** |
| **15147** | **Anipamil** | **POS** | **0.025564795** |
| **15150** | **Tetraphosphorus decaoxide** | **POS** | **0.000920506** |
| **15153** | **Chlorin E6** | **NEG** | **0.028312776** |
| **15159** |  | **NEG** | **0.019964518** |
| **15160** |  | **NEG** | **0.01179065** |
| **15164** |  | **POS** | **0.00162311** |
| **15165** |  | **NEG** | **0.015486348** |
| **15169** |  | **POS** | **3.57412E-05** |
| **15171** | **1,1,1-Trifluoro-3-hydroxypropan-2-one** | **NEG** | **0.003589559** |
| **15173** | **Chloroneb** | **NEG** | **0.000321489** |
| **15174** |  | **NEG** | **0.03226245** |
| **15175** |  | **NEG** | **3.89523E-05** |
| **15178** |  | **POS** | **0.003076551** |
| **15185** |  | **POS** | **0.004525073** |
| **15189** |  | **NEG** | **0.004190545** |
| **15194** | **Monodehydroascorbate** | **POS** | **0.005411837** |
| **15196** |  | **POS** | **0.00062839** |
| **15199** | **(1alpha,3beta,20S,22R,24S,25S)-Pubescenin** | **POS** | **0.013584138** |
| **15203** |  | **POS** | **0.013631531** |
| **15206** |  | **POS** | **0.037291811** |
| **15209** |  | **POS** | **0.001386363** |
| **15213** | **Taranabant** | **POS** | **0.010806837** |
| **15214** |  | **NEG** | **4.93416E-05** |
| **15217** |  | **NEG** | **0.039120825** |
| **15218** |  | **NEG** | **0.022506364** |
| **15234** | **Ternatin** | **NEG** | **0.02820112** |
| **15236** |  | **POS** | **0.004237174** |
| **15239** |  | **POS** | **0.006334513** |
| **15242** | **Chlorophyllide b** | **POS** | **0.016654982** |
| **15243** |  | **NEG** | **0.036746709** |
| **15248** |  | **NEG** | **0.006718886** |
| **15249** |  | **POS** | **0.049053599** |
| **15251** |  | **NEG** | **0.012703164** |
| **15252** |  | **NEG** | **0.018172194** |
| **15253** |  | **POS** | **0.044570661** |
| **15254** |  | **POS** | **0.044951846** |
| **15256** |  | **POS** | **0.009288326** |
| **15259** | **Ziprasidone** | **NEG** | **0.030385379** |
| **15260** |  | **NEG** | **0.020912577** |
| **15262** | **Copper glucote** | **POS** | **0.011192181** |
| **15264** | **4-O-Carboxymethyl ascochlorin** | **NEG** | **0.005745753** |
| **15265** |  | **POS** | **3.77923E-07** |
| **15267** |  | **POS** | **0.006308882** |
| **15270** |  | **POS** | **0.013197354** |
| **15271** |  | **NEG** | **0.019898122** |
| **15272** |  | **POS** | **0.0164103** |
| **15274** |  | **NEG** | **0.022913226** |
| **15276** | **Bromobenzene** | **POS** | **0.006600413** |
| **15277** |  | **NEG** | **0.005274325** |
| **15278** |  | **POS** | **0.040876362** |
| **15281** |  | **NEG** | **0.014677793** |
| **15286** |  | **POS** | **0.026631191** |
| **15287** | **Amaranth** | **POS** | **7.18449E-05** |
| **15289** | **2-Dodecyl-3-oxooctadecanal** | **POS** | **0.02649753** |
| **15290** |  | **NEG** | **0.000973831** |
| **15292** |  | **NEG** | **0.012671502** |
| **15293** |  | **POS** | **0.015680903** |
| **15295** |  | **NEG** | **0.000159555** |
| **15296** |  | **NEG** | **0.003277193** |
| **15297** |  | **POS** | **0.011455879** |
| **15301** |  | **NEG** | **9.07777E-05** |
| **15302** |  | **POS** | **0.006996368** |
| **15303** |  | **NEG** | **0.000566446** |
| **15309** |  | **POS** | **0.021533246** |
| **15313** |  | **POS** | **0.003628798** |
| **15315** |  | **NEG** | **0.000480871** |
| **15317** |  | **POS** | **0.005039931** |
| **15319** |  | **POS** | **0.035182245** |
| **15321** |  | **NEG** | **0.014623926** |
| **15324** |  | **POS** | **0.002976402** |
| **15327** |  | **NEG** | **0.028810932** |
| **15328** |  | **NEG** | **0.004259763** |
| **15331** |  | **POS** | **0.002498128** |
| **15342** |  | **POS** | **0.000911596** |
| **15343** |  | **NEG** | **0.020827223** |
| **15345** |  | **NEG** | **0.02690192** |
| **15346** |  | **POS** | **0.033269211** |
| **15348** |  | **POS** | **0.037834143** |
| **15349** | **Fipronil Desulfinyl** | **NEG** | **0.00182367** |
| **15352** |  | **NEG** | **0.000834577** |
| **15356** |  | **NEG** | **0.024747607** |
| **15358** |  | **NEG** | **0.017872708** |
| **15359** |  | **NEG** | **0.006599256** |
| **15360** |  | **NEG** | **0.003535256** |
| **15361** |  | **NEG** | **1.09821E-05** |
| **15362** |  | **NEG** | **0.002915962** |
| **15363** |  | **POS** | **0.032242155** |
| **15364** |  | **POS** | **0.008918844** |
| **15365** |  | **POS** | **0.015999218** |
| **15366** | **Vemurafenib** | **POS** | **0.03735007** |
| **15368** |  | **NEG** | **0.038325483** |
| **15369** | **4-Amino-5-[[2-[[1-chloro-6-(diaminomethylideneamino)-2-oxohexan-3-yl]amino]acetyl]amino]-5-oxopentanoic acid** | **POS** | **0.021464505** |
| **15370** |  | **POS** | **0.025359286** |
| **15372** |  | **NEG** | **0.037768139** |
| **15375** |  | **POS** | **0.001294278** |
| **15376** |  | **NEG** | **0.000279579** |
| **15377** |  | **NEG** | **0.004350845** |
| **15380** |  | **POS** | **0.032873766** |
| **15382** | **2,5-Dichloro-4-oxohex-2-enedioate** | **NEG** | **0.023700753** |
| **15385** |  | **NEG** | **0.000518382** |
| **15386** |  | **NEG** | **0.00593609** |
| **15390** |  | **POS** | **0.005712697** |
| **15393** | **8-Bromoadenosine** | **NEG** | **0.016107702** |
| **15394** | **AL-294** | **NEG** | **4.1163E-05** |
| **15396** |  | **NEG** | **0.003691885** |
| **15398** |  | **NEG** | **0.021952971** |
| **15399** |  | **NEG** | **0.019009505** |
| **15402** |  | **POS** | **0.010685984** |
| **15403** |  | **NEG** | **0.000685241** |
| **15404** |  | **NEG** | **0.030894924** |
| **15405** |  | **POS** | **0.001808143** |
| **15406** |  | **POS** | **0.048221227** |
| **15407** | **Ustiloxin** | **POS** | **0.025887001** |
| **15408** |  | **NEG** | **0.002741316** |
| **15409** |  | **NEG** | **0.000446802** |
| **15410** |  | **NEG** | **0.000118352** |
| **15411** |  | **NEG** | **0.001104685** |
| **15412** |  | **NEG** | **0.006325722** |
| **15413** |  | **POS** | **0.02209337** |
| **15414** |  | **POS** | **0.000348046** |
| **15418** |  | **POS** | **0.009013747** |
| **15419** | **DG(15:0/0:0/20:5n3)** | **POS** | **0.01202753** |
| **15421** |  | **NEG** | **0.04244115** |
| **15425** |  | **POS** | **0.017754065** |
| **15426** | **Bis(4'-chlorophenyl)methane** | **NEG** | **0.006445513** |
| **15427** |  | **POS** | **0.002695405** |
| **15428** |  | **POS** | **0.004106782** |
| **15431** |  | **NEG** | **0.002861769** |
| **15435** |  | **NEG** | **0.017725156** |
| **15436** |  | **NEG** | **0.000242845** |
| **15437** |  | **NEG** | **0.028729596** |
| **15438** |  | **NEG** | **2.59923E-06** |
| **15439** |  | **NEG** | **0.047269975** |
| **15441** |  | **NEG** | **0.042029014** |
| **15445** |  | **NEG** | **0.039375711** |
| **15451** |  | **POS** | **0.002284585** |
| **15453** |  | **NEG** | **0.048331577** |
| **15455** |  | **NEG** | **0.034975497** |
| **15456** |  | **POS** | **0.01987573** |
| **15457** | **2,4-DB** | **POS** | **0.006630683** |
| **15469** |  | **POS** | **0.00015369** |
| **15471** |  | **POS** | **5.47956E-05** |
| **15473** | **Tetracozole** | **POS** | **0.03637727** |
| **15475** |  | **NEG** | **0.002468217** |
| **15478** |  | **POS** | **0.006967454** |
| **15484** |  | **POS** | **0.006787977** |
| **15486** |  | **NEG** | **0.026349673** |
| **15491** |  | **POS** | **0.000746509** |
| **15492** |  | **POS** | **0.008306776** |
| **15493** |  | **NEG** | **4.11352E-07** |
| **15496** |  | **NEG** | **0.025974303** |
| **15497** | **3,5-Dinitrosalicylic acid** | **NEG** | **0.012206806** |
| **15498** | **Oxethazaine** | **NEG** | **1.46833E-06** |
| **15499** |  | **NEG** | **0.012133975** |
| **15501** |  | **POS** | **0.002583532** |
| **15502** |  | **POS** | **0.013657536** |
| **15503** |  | **POS** | **0.005896038** |
| **15506** |  | **POS** | **0.023256345** |
| **15509** | **dUTP** | **NEG** | **0.000485907** |
| **15510** |  | **NEG** | **0.023340275** |
| **15511** |  | **POS** | **0.005402486** |
| **15512** |  | **POS** | **0.00518781** |
| **15515** | **Methyl iodide** | **POS** | **0.003153567** |
| **15517** |  | **POS** | **0.00560255** |
| **15520** |  | **POS** | **0.012990014** |
| **15521** |  | **NEG** | **0.010642685** |
| **15524** |  | **NEG** | **0.005847441** |
| **15525** |  | **NEG** | **0.00062439** |
| **15531** | **Nedaplatin** | **NEG** | **0.049460657** |
| **15537** | **Cer(d18:0/PGF1alpha)** | **NEG** | **0.027616015** |
| **15538** |  | **POS** | **0.041189665** |
| **15539** |  | **POS** | **0.004556301** |
| **15541** |  | **POS** | **1.79953E-05** |
| **15542** |  | **NEG** | **0.005156068** |
| **15544** |  | **NEG** | **0.013877168** |
| **15549** |  | **POS** | **0.009571261** |
| **15550** |  | **NEG** | **0.00388677** |
| **15551** |  | **NEG** | **0.02274652** |
| **15552** |  | **NEG** | **0.000938915** |
| **15553** | **Squalamine** | **NEG** | **0.00359309** |
| **15554** |  | **POS** | **0.000543999** |
| **15555** |  | **NEG** | **0.005018763** |
| **15559** |  | **POS** | **0.010770018** |
| **15561** |  | **POS** | **0.002598079** |
| **15562** |  | **POS** | **0.006155574** |
| **15563** | **N-Ethyl-1,1,2,2,3,3,4,4,5,5,6,6,7,7,8,8,8-heptadecafluoro-N-(2-hydroxyethyl)octane-1-sulfonamide** | **POS** | **0.005806613** |
| **15567** |  | **NEG** | **0.048603323** |
| **15574** |  | **POS** | **0.000172475** |
| **15577** | **Phosphovanillin** | **NEG** | **0.031515925** |
| **15579** |  | **NEG** | **0.005644614** |
| **15582** |  | **POS** | **0.015971175** |
| **15584** |  | **POS** | **0.018104274** |
| **15589** |  | **NEG** | **0.034148525** |
| **15591** |  | **NEG** | **0.037030455** |
| **15593** |  | **NEG** | **0.020797734** |
| **15594** |  | **NEG** | **0.006122337** |
| **15595** | **Diisopropylamine** | **POS** | **0.040947125** |
| **15598** | **Nedaplatin** | **POS** | **0.020271355** |
| **15602** |  | **POS** | **0.008236701** |
| **15603** |  | **POS** | **0.000516143** |
| **15606** | **Selenohomocystine** | **NEG** | **0.000103229** |
| **15607** |  | **POS** | **0.007442094** |
| **15609** | **Phosphinic amide, bis(1-aziridinyl)-N-bis(2-chloroethyl)-** | **NEG** | **0.036755269** |
| **15610** |  | **NEG** | **0.01515149** |
| **15611** | **Propanoyl phosphate** | **POS** | **0.000350399** |
| **15612** | **2-Oxo-4-phosphonobutanoate** | **POS** | **0.007883591** |
| **15614** |  | **POS** | **0.008113398** |
| **15615** |  | **POS** | **0.000214048** |
| **15616** | **N'-Phosphoguanidinoethyl methyl phosphate** | **POS** | **0.041083881** |
| **15617** |  | **POS** | **0.032403459** |
| **15621** |  | **NEG** | **0.036350844** |
| **15622** |  | **NEG** | **1.3414E-05** |
| **15623** |  | **POS** | **0.000488502** |
| **15624** |  | **POS** | **0.035183655** |
| **15626** |  | **POS** | **0.002607013** |
| **15628** | **Phosphophosphite** | **POS** | **0.002791349** |
| **15629** |  | **POS** | **0.00031056** |
| **15634** |  | **POS** | **4.19339E-05** |
| **15639** | **Citreovirone** | **NEG** | **5.24881E-06** |
| **15642** | **6-Phospho-D-glucote** | **POS** | **0.038322502** |
| **15645** |  | **NEG** | **4.28743E-05** |
| **15650** |  | **NEG** | **0.000622523** |
| **15651** |  | **POS** | **0.002200581** |
| **15653** | **Anhwiedelphinine** | **POS** | **0.02617293** |
| **15654** |  | **NEG** | **4.40338E-05** |
| **15656** |  | **NEG** | **0.023469071** |
| **15657** |  | **NEG** | **0.01705922** |
| **15658** |  | **NEG** | **0.007523786** |
| **15659** |  | **NEG** | **0.013872414** |
| **15660** |  | **NEG** | **5.91649E-05** |
| **15670** |  | **NEG** | **0.016577435** |
| **15671** |  | **NEG** | **0.004848962** |
| **15673** |  | **NEG** | **0.011387546** |
| **15675** |  | **POS** | **0.006190982** |
| **15678** |  | **POS** | **0.035844159** |
| **15679** | **Cer(d17:1/LTE4)** | **POS** | **3.16731E-05** |
| **15681** | **N-(3,5-Dichloro-4-hydroxyphenyl)-2-hydroxybenzamide** | **NEG** | **0.004098946** |
| **15682** |  | **NEG** | **0.000550984** |
| **15683** |  | **NEG** | **0.039705093** |
| **15689** | **Uracil mustard** | **POS** | **1.96531E-05** |
| **15690** |  | **POS** | **0.004399446** |
| **15693** |  | **POS** | **0.000512332** |
| **15697** | **Guanosine 5'-O-(2-thiodiphosphate)** | **NEG** | **0.003897203** |
| **15698** |  | **NEG** | **0.002662245** |
| **15702** |  | **POS** | **1.50225E-06** |
| **15703** |  | **POS** | **0.000704202** |
| **15706** |  | **NEG** | **0.013398694** |
| **15709** |  | **POS** | **0.047112445** |
| **15715** |  | **NEG** | **0.001925022** |
| **15718** |  | **NEG** | **0.003586919** |
| **15722** |  | **NEG** | **0.000217484** |
| **15723** | **Tert-butyl 4-[4-[(2-chloro-5-nitrobenzoyl)amino]phenyl]piperazine-1-carboxylate** | **NEG** | **0.037170006** |
| **15724** |  | **NEG** | **0.013410074** |
| **15725** |  | **NEG** | **1.98657E-05** |
| **15726** |  | **NEG** | **0.000610988** |
| **15727** |  | **NEG** | **0.00018672** |
| **15730** | **DG(15:0/22:1(13Z)/0:0)** | **NEG** | **0.002606063** |
| **15731** |  | **NEG** | **0.000297057** |
| **15735** |  | **NEG** | **0.000718511** |
| **15738** |  | **NEG** | **0.046250493** |
| **15739** |  | **NEG** | **0.001653656** |
| **15741** |  | **NEG** | **0.000818308** |
| **15742** |  | **NEG** | **0.040699635** |
| **15744** |  | **NEG** | **0.000104268** |
| **15745** |  | **POS** | **0.000104376** |
| **15746** |  | **POS** | **0.006528885** |
| **15759** |  | **NEG** | **0.01446238** |
| **15760** |  | **POS** | **0.000859979** |
| **15761** |  | **POS** | **0.004428256** |
| **15764** |  | **POS** | **0.030598601** |
| **15767** | **3-(4-Iodophenyl)-2-mercapto-(Z)-2-propenoic acid** | **NEG** | **0.003674674** |
| **15768** |  | **NEG** | **0.000853262** |
| **15769** |  | **NEG** | **0.007252676** |
| **15776** |  | **POS** | **0.012488737** |
| **15779** |  | **POS** | **0.003818052** |
| **15782** | **3',5'-Cyclic IMP** | **POS** | **0.022013418** |
| **15785** |  | **POS** | **0.024161934** |
| **15787** |  | **POS** | **0.000513516** |
| **15789** |  | **NEG** | **0.001033871** |
| **15793** |  | **NEG** | **0.009025541** |
| **15794** |  | **NEG** | **0.001007589** |
| **15795** |  | **NEG** | **0.041742524** |
| **15796** |  | **NEG** | **0.000529725** |
| **15797** |  | **NEG** | **0.015660491** |
| **15799** |  | **NEG** | **0.011569977** |
| **15802** |  | **POS** | **0.001702058** |
| **15806** |  | **POS** | **0.030712263** |
| **15810** |  | **POS** | **0.005313902** |
| **15812** | **4'-Hydroxy Aceclofenac** | **POS** | **0.024161019** |
| **15823** | **3',5'-Cyclic IMP** | **NEG** | **0.033187675** |
| **15824** |  | **NEG** | **6.02385E-05** |
| **15827** |  | **NEG** | **0.045523786** |
| **15829** | **trans-Nochlor** | **NEG** | **0.004113539** |
| **15831** |  | **NEG** | **0.013672409** |
| **15832** |  | **NEG** | **0.009218952** |
| **15835** |  | **POS** | **0.048611717** |
| **15836** |  | **POS** | **0.027151464** |
| **15838** |  | **NEG** | **4.57641E-05** |
| **15841** |  | **NEG** | **0.036835702** |
| **15844** |  | **NEG** | **0.029925602** |
| **15845** |  | **NEG** | **0.018195252** |
| **15848** |  | **NEG** | **0.000744102** |
| **15849** |  | **NEG** | **0.000387444** |
| **15850** |  | **NEG** | **0.0019533** |
| **15852** |  | **NEG** | **0.002934096** |
| **15853** |  | **NEG** | **0.022663009** |
| **15855** |  | **NEG** | **0.012101929** |
| **15857** |  | **NEG** | **0.000385909** |
| **15858** |  | **NEG** | **0.005932763** |
| **15859** |  | **NEG** | **0.001309448** |
| **15860** | **Roflumilast** | **NEG** | **0.011785541** |
| **15861** |  | **NEG** | **0.033769695** |
| **15862** |  | **NEG** | **0.000859786** |
| **15864** |  | **NEG** | **0.019952422** |
| **15865** |  | **NEG** | **0.003486961** |
| **15866** |  | **NEG** | **0.006834262** |
| **15867** |  | **NEG** | **0.010228184** |
| **15868** |  | **NEG** | **2.70818E-06** |
| **15869** |  | **NEG** | **0.000882746** |
| **15870** | **erythro-8,10-Pentatriacontanediol** | **NEG** | **0.001424391** |
| **15872** |  | **POS** | **0.037209015** |
| **15874** |  | **POS** | **0.002352176** |
| **15880** |  | **NEG** | **2.37428E-05** |
| **15881** |  | **NEG** | **0.01393502** |
| **15883** | **D-Glucosamine 6-phosphate** | **NEG** | **1.50524E-05** |
| **15884** | **Methazole** | **NEG** | **0.005588114** |
| **15885** |  | **NEG** | **0.000515049** |
| **15891** |  | **NEG** | **0.000971515** |
| **15893** |  | **NEG** | **0.049598331** |
| **15896** |  | **NEG** | **0.001390946** |
| **15898** |  | **NEG** | **0.016528274** |
| **15899** |  | **NEG** | **0.044870773** |
| **15901** |  | **NEG** | **0.012777912** |
| **15902** |  | **NEG** | **0.002673569** |
| **15903** | **perfluorooctanesulfinic acid** | **NEG** | **0.008377811** |
| **15906** | **Taxine A** | **NEG** | **0.000298344** |
| **15907** |  | **NEG** | **0.009319354** |
| **15914** |  | **NEG** | **0.001977947** |
| **15915** |  | **NEG** | **0.023614131** |
| **15921** |  | **NEG** | **0.021660106** |
| **15922** |  | **NEG** | **0.009002732** |
| **15924** |  | **NEG** | **0.000700203** |
| **15925** |  | **NEG** | **0.000886327** |
| **15927** | **2-hydroxy-5-(methylthio)-3-oxopent-1-enyl phosphate** | **POS** | **0.012849108** |
| **15931** |  | **NEG** | **0.007186044** |
| **15938** |  | **POS** | **0.043570494** |
| **15955** |  | **POS** | **0.001271633** |
| **15956** |  | **POS** | **0.002595461** |
| **15960** |  | **POS** | **0.010639509** |
| **15961** |  | **POS** | **0.003523396** |
| **15963** |  | **POS** | **0.010609193** |
| **15966** | **apicidin** | **POS** | **0.020640438** |
| **15968** | **Anhwiedelphinine** | **POS** | **6.31668E-05** |
| **15969** |  | **POS** | **0.000132416** |
| **15970** |  | **NEG** | **0.03912895** |
| **15973** |  | **NEG** | **0.020989891** |
| **15974** |  | **NEG** | **0.016928186** |
| **15977** |  | **NEG** | **0.000858686** |
| **15978** |  | **NEG** | **0.000278345** |
| **15979** | **Calcium hydroxide** | **POS** | **0.034750056** |
| **15981** |  | **POS** | **0.004826658** |
| **15982** |  | **POS** | **0.034700045** |
| **15983** |  | **POS** | **0.029623855** |
| **15984** |  | **POS** | **0.002840627** |
| **15987** |  | **POS** | **0.013687157** |
| **15988** |  | **POS** | **0.000975361** |
| **15996** |  | **POS** | **0.036404077** |
| **15997** |  | **POS** | **0.01665907** |
| **15998** |  | **POS** | **0.003876617** |
| **16000** |  | **POS** | **0.013324162** |
| **16005** |  | **POS** | **0.002332299** |
| **16006** | **4-hydroxytriazolam** | **POS** | **0.000312807** |
| **16008** |  | **POS** | **0.008651052** |
| **16010** |  | **POS** | **0.004196772** |
| **16011** |  | **POS** | **0.000431284** |
| **16012** |  | **POS** | **0.036183759** |
| **16015** |  | **POS** | **0.011437109** |
| **16016** | **Tetraprenyl-beta-curcumene** | **POS** | **0.003310784** |
| **16020** | **Mesaconitine** | **POS** | **7.71675E-05** |
| **16021** |  | **POS** | **0.00739185** |
| **16022** |  | **POS** | **0.016201586** |
| **16023** | **Avridine** | **POS** | **0.002566725** |
| **16024** |  | **POS** | **0.004298753** |
| **16025** |  | **POS** | **0.004169997** |
| **16026** |  | **POS** | **0.005912923** |
| **16029** |  | **NEG** | **0.01323578** |
| **16030** |  | **NEG** | **0.009277839** |
| **16032** |  | **POS** | **0.000442493** |
| **16036** | **(2-Methylphenyl) Dihydrogen Phosphate** | **POS** | **0.002874044** |
| **16039** |  | **POS** | **0.021358551** |
| **16041** | **3-(Phosphoacetylamido)-L-alanine** | **POS** | **6.6931E-06** |
| **16044** | **D-Glucosamine 6-phosphate** | **POS** | **3.88375E-06** |
| **16048** |  | **POS** | **0.035555339** |
| **16049** | **6-Mercaptopurine ribonucleoside triphosphate** | **POS** | **0.015919683** |
| **16051** | **Riboflavine 2',3',4',5'-tetrabutanoate** | **POS** | **0.016657243** |
| **16057** |  | **NEG** | **0.002149011** |
| **16058** | **Vibriobactin** | **NEG** | **0.011804864** |
| **16062** |  | **NEG** | **0.005106894** |
| **16064** |  | **NEG** | **0.013139818** |
| **16068** | **Nitroxinil** | **POS** | **0.008305295** |
| **16073** | **Hexanitrohexaazaisowurtzitane** | **POS** | **0.018519085** |
| **16075** |  | **NEG** | **0.001554623** |
| **16076** | **5-Hydroxyisourate** | **NEG** | **1.49741E-05** |
| **16077** |  | **NEG** | **9.86096E-05** |
| **16081** |  | **NEG** | **0.009532569** |
| **16082** |  | **POS** | **0.022632842** |
| **16083** | **sn-Glycerol 3-phosphate** | **NEG** | **0.031191001** |
| **16088** | **rceine** | **POS** | **0.036916722** |
| **16089** |  | **POS** | **0.0056331** |
| **16090** |  | **POS** | **0.001921231** |
| **16091** | **Viniferin-alpha** | **POS** | **0.002268083** |
| **16092** |  | **NEG** | **0.001184575** |
| **16093** | **Riboflavine 2',3',4',5'-tetrabutanoate** | **NEG** | **0.00934725** |
| **16106** |  | **POS** | **0.006496338** |
| **16108** | **Isopentenyl phosphate** | **POS** | **0.018743332** |
| **16109** | **Dichlormid** | **POS** | **0.024374438** |
| **16112** |  | **POS** | **0.004974765** |
| **16113** |  | **POS** | **0.015740529** |
| **16116** |  | **POS** | **2.23776E-06** |
| **16117** | **6,7-Dichloro-3-hydroxy-1,5 dihydro-imidazo[2,1-b]quinazolin-2-one** | **POS** | **0.00843833** |
| **16121** |  | **POS** | **0.039753431** |
| **16123** | **Bropirimine** | **NEG** | **0.004662247** |
| **16127** |  | **NEG** | **0.020906957** |
| **16128** |  | **NEG** | **0.028496509** |
| **16129** |  | **NEG** | **0.021648631** |
| **16130** |  | **POS** | **0.005859711** |
| **16140** |  | **POS** | **0.007521684** |
| **16141** |  | **POS** | **0.014428079** |
| **16143** |  | **POS** | **0.018140898** |
| **16146** |  | **NEG** | **0.000293528** |
| **16151** |  | **NEG** | **0.047578144** |
| **16153** |  | **POS** | **0.028352282** |
| **16158** |  | **POS** | **0.019483923** |
| **16161** |  | **POS** | **0.014960545** |
| **16165** |  | **NEG** | **0.004388192** |
| **16169** | **Sodium phosphate (Na(H2PO4))** | **NEG** | **0.000165474** |
| **16173** | **Selenomethionine Se-oxide** | **NEG** | **0.000487539** |
| **16175** |  | **NEG** | **0.0036791** |
| **16178** |  | **NEG** | **0.000588946** |
| **16179** |  | **NEG** | **0.002916609** |
| **16180** | **3b-Hydroxy-6b-(3-chloro-2-hydroxy-2-methylbutanoyloxy)-7(11)-eremophilen-12,8b-olide** | **NEG** | **0.010216741** |
| **16181** |  | **NEG** | **0.002815541** |
| **16183** |  | **NEG** | **0.012817709** |
| **16184** |  | **NEG** | **0.014473861** |
| **16185** |  | **POS** | **0.001490315** |
| **16186** | **TRIFLUOROMETHANOL** | **NEG** | **0.010839992** |
| **16194** | **Octafluorocyclobutane** | **NEG** | **0.000439117** |
| **16195** |  | **NEG** | **0.000556214** |
| **16196** |  | **NEG** | **9.40222E-06** |
| **16197** | **TTF-1** | **NEG** | **0.025174645** |
| **16202** |  | **POS** | **0.000456588** |
| **16209** |  | **POS** | **0.018504981** |
| **16212** |  | **NEG** | **0.020878464** |
| **16213** |  | **NEG** | **0.005868242** |
| **16215** |  | **NEG** | **0.000109985** |
| **16216** | **Arnamiol** | **NEG** | **0.003500599** |
| **16222** | **CerP(d18:1/18:0)** | **NEG** | **0.00480293** |
| **16224** |  | **POS** | **0.004098437** |
| **16225** | **sn-Glycerol 3-phosphate** | **POS** | **0.020015572** |
| **16227** |  | **POS** | **0.000346739** |
| **16229** |  | **NEG** | **0.000174173** |
| **16230** |  | **POS** | **0.002058715** |
| **16233** |  | **NEG** | **0.000464695** |
| **16234** |  | **NEG** | **0.001253127** |
| **16236** |  | **POS** | **0.002700182** |
| **16241** |  | **NEG** | **0.000594229** |
| **16242** | **Edoxaban** | **NEG** | **0.003363632** |
| **16246** |  | **POS** | **0.009691335** |
| **16249** |  | **NEG** | **0.012938234** |
| **16253** |  | **NEG** | **9.35334E-05** |
| **16255** |  | **NEG** | **0.018759766** |
| **16256** | **2-(((3,5-Dichlorophenyl)carbamoyl)oxy)-2-methyl-3-butenoic acid** | **NEG** | **0.025855475** |
| **16258** |  | **NEG** | **0.00386623** |
| **16259** |  | **NEG** | **0.042182243** |
| **16260** | **8-Chlorodiltiazem** | **NEG** | **0.00438691** |
| **16261** | **Belnacasan** | **NEG** | **0.001024091** |
| **16262** |  | **NEG** | **0.035351525** |
| **16263** |  | **NEG** | **0.005686752** |
| **16265** |  | **NEG** | **0.029098121** |
| **16269** | **Clomocycline** | **NEG** | **0.00521978** |
| **16270** |  | **NEG** | **0.01739083** |
| **16271** |  | **NEG** | **0.048147345** |
| **16274** |  | **POS** | **0.028135696** |
| **16275** |  | **POS** | **0.027384816** |
| **16276** | **Chlorquinox** | **POS** | **0.007877788** |
| **16278** |  | **NEG** | **0.009941946** |
| **16280** | **Platinum** | **NEG** | **0.000240663** |
| **16281** |  | **NEG** | **0.009222841** |
| **16283** | **Caldariellaquinone** | **NEG** | **0.014612028** |
| **16287** |  | **POS** | **0.013497601** |
| **16289** |  | **POS** | **0.034012605** |
| **16290** |  | **NEG** | **0.000209797** |
| **16291** |  | **NEG** | **3.55741E-05** |
| **16297** |  | **POS** | **0.007136098** |
| **16298** |  | **NEG** | **0.004301847** |
| **16299** |  | **NEG** | **0.009433929** |
| **16300** | **4-Chloro-ortho-phenylenediamine** | **POS** | **0.043227974** |
| **16303** | **1H-Perfluorooctane** | **POS** | **0.014677782** |
| **16307** |  | **NEG** | **0.002812532** |
| **16309** | **(6-Isocyanatohexyl)carbamic acid 3beta-cholesteryl ester** | **NEG** | **0.032886686** |
| **16315** |  | **POS** | **0.002946524** |
| **16319** |  | **NEG** | **0.044823116** |
| **16321** | **1D-myo-Inositol 1,3,4,5-tetrakisphosphate** | **POS** | **0.007218844** |
| **16323** |  | **NEG** | **0.035429555** |
| **16326** |  | **NEG** | **0.024619577** |
| **16327** |  | **POS** | **0.003043525** |
| **16328** | **Cyclonite** | **NEG** | **0.002461803** |
| **16329** |  | **NEG** | **0.007829175** |
| **16330** | **Chiniofon** | **NEG** | **2.05375E-05** |
| **16336** |  | **POS** | **0.004667153** |
| **16337** | **Acriflavine** | **NEG** | **0.001334433** |
| **16341** | **Cer(d17:1/5-iso PGF2VI)** | **POS** | **0.000494372** |
| **16343** | **2-Amino-5-iodo-6-phenyl-4-pyrimidinone** | **NEG** | **0.019034932** |
| **16344** | **Meclofemate sodium** | **NEG** | **0.011850682** |
| **16346** |  | **NEG** | **0.030770925** |
| **16348** | **CE(12:0)** | **NEG** | **0.00710835** |
| **16352** |  | **NEG** | **0.016945222** |
| **16353** |  | **NEG** | **0.006756598** |
| **16354** | **Cer(d17:1/16:0)** | **NEG** | **0.010313486** |
| **16355** | **[3,7-Dimethyl-9-(2,6,6-trimethylcyclohexen-1-yl)nona-2,4,6,8-tetraenyl] hexadecanoate** | **NEG** | **0.044612289** |
| **16361** |  | **POS** | **0.012409006** |
| **16367** |  | **POS** | **0.00150103** |
| **16368** |  | **POS** | **0.003640699** |
| **16370** |  | **POS** | **0.000873524** |
| **16376** |  | **NEG** | **4.21027E-05** |
| **16378** |  | **POS** | **0.00019559** |
| **16380** |  | **NEG** | **0.013131422** |
| **16384** |  | **NEG** | **0.001032795** |
| **16385** |  | **NEG** | **0.003658455** |
| **16387** |  | **POS** | **0.016582856** |
| **16388** |  | **POS** | **0.007101219** |
| **16389** | **Asimicin** | **POS** | **0.02431635** |
| **16390** |  | **NEG** | **0.000183677** |
| **16396** | **(2-Carbamoyl-7-oxo-1,6-diazabicyclo[3.2.1]octan-6-yl) hydrogen sulfate** | **POS** | **0.004971557** |
| **16397** |  | **POS** | **0.013034959** |
| **16398** | **N-n-Butyl-N-methyl-11-(3,17beta-dihydroxyestra-1,3,5(10)-trien-7alpha-yl)undecanamide** | **POS** | **0.018783428** |
| **16399** | **Acetyl-Tyr-Val-Ala-Asp-chloromethylketone** | **NEG** | **0.006268922** |
| **16402** | **Chloramben** | **POS** | **0.016482918** |
| **16405** |  | **NEG** | **0.014361971** |
| **16410** |  | **NEG** | **9.59158E-05** |
| **16412** | **4-[3-Chloro-4-(pyridin-2-ylmethoxy)anilino]-6-[[(E)-4-(dimethylamino)but-2-enyl]amino]-7-ethoxyquinoline-3-carbonitrile** | **NEG** | **0.029649499** |
| **16413** |  | **POS** | **0.000338324** |
| **16415** |  | **POS** | **0.039810768** |
| **16417** |  | **POS** | **0.021530427** |
| **16418** | **2-Chloroethanol** | **POS** | **0.01223565** |
| **16423** |  | **POS** | **0.037688567** |
| **16424** |  | **NEG** | **2.85396E-05** |
| **16425** |  | **NEG** | **0.000128967** |
| **16428** |  | **POS** | **0.026966523** |
| **16430** |  | **NEG** | **0.000329575** |
| **16431** | **Prostanoic acid** | **NEG** | **0.011315249** |
| **16433** |  | **POS** | **0.001199791** |
| **16437** |  | **NEG** | **5.14869E-05** |
| **16444** |  | **POS** | **0.012774683** |
| **16449** |  | **POS** | **0.031837822** |
| **16457** |  | **POS** | **0.006359693** |
| **16458** |  | **POS** | **0.031563581** |
| **16464** | **N-(Tetradecanoyl)-sphing-4-enine** | **POS** | **0.003622809** |
| **16468** |  | **NEG** | **0.01937672** |
| **16471** |  | **NEG** | **0.002860957** |
| **16473** |  | **NEG** | **0.008779436** |
| **16474** |  | **POS** | **0.017758349** |
| **16477** |  | **POS** | **0.000547866** |
| **16478** |  | **POS** | **1.11398E-05** |
| **16481** | **all-trans-Neurosporene** | **NEG** | **0.000709834** |
| **16483** |  | **POS** | **0.001706626** |
| **16484** |  | **POS** | **0.000553674** |
| **16488** |  | **POS** | **0.010548311** |
| **16489** |  | **POS** | **0.029668403** |
| **16491** |  | **POS** | **0.006343702** |
| **16493** |  | **POS** | **0.001565078** |
| **16495** |  | **NEG** | **0.024801462** |
| **16496** |  | **POS** | **0.001006355** |
| **16497** |  | **POS** | **0.00092627** |
| **16504** |  | **POS** | **1.67371E-05** |
| **16505** |  | **NEG** | **0.014890857** |
| **16508** |  | **NEG** | **0.006672774** |
| **16509** |  | **NEG** | **0.000504374** |
| **16510** |  | **NEG** | **0.016809477** |
| **16515** |  | **POS** | **0.008451188** |
| **16521** |  | **POS** | **5.53711E-05** |
| **16523** |  | **POS** | **0.016956345** |
| **16524** |  | **POS** | **0.005054735** |
| **16526** | **Sodium citrate** | **NEG** | **0.002489485** |
| **16537** | **Meconic acid** | **NEG** | **1.40769E-05** |
| **16538** | **1-Hexadecanoyl-2-(9Z-octadecenoyl)-sn-glycero-3-phosphocholine** | **NEG** | **0.027562217** |
| **16549** |  | **POS** | **0.013987306** |
| **16551** |  | **NEG** | **0.007558398** |
| **16553** |  | **NEG** | **0.036433947** |
| **16555** | **3-Bromo-tyrosine** | **NEG** | **0.001890355** |
| **16559** | **Chlorphonium chloride** | **NEG** | **0.048836823** |
| **16561** | **Mersalyl acid** | **NEG** | **0.018826742** |
| **16562** |  | **POS** | **0.001064996** |
| **16563** |  | **POS** | **0.003460977** |
| **16564** | **Trichilin A** | **POS** | **0.010173149** |
| **16567** |  | **NEG** | **0.001956112** |
| **16568** | **Dinitrogen trioxide** | **POS** | **0.003597049** |
| **16573** |  | **POS** | **0.034942266** |
| **16575** |  | **POS** | **0.000787674** |
| **16578** |  | **POS** | **0.000414208** |
| **16580** |  | **NEG** | **8.37066E-05** |
| **16581** | **25C-NBOMe** | **NEG** | **0.006033217** |
| **16582** | **Acutumine** | **NEG** | **0.031709806** |
| **16583** |  | **NEG** | **0.033135192** |
| **16586** |  | **POS** | **0.004776568** |
| **16591** |  | **NEG** | **0.012516406** |
| **16595** |  | **POS** | **0.002299329** |
| **16598** | **3-Chloro-D-alanine** | **POS** | **0.020034256** |
| **16599** | **Methyl methylthio selenide** | **POS** | **0.00519192** |
| **16604** | **PG(a-13:0/i-12:0)** | **POS** | **0.013653962** |
| **16605** | **(2-Methylphenyl) Dihydrogen Phosphate** | **NEG** | **0.000579038** |
| **16609** |  | **NEG** | **0.001752125** |
| **16619** |  | **NEG** | **0.018168212** |
| **16623** |  | **POS** | **0.004765476** |
| **16624** |  | **POS** | **0.011091033** |
| **16628** |  | **POS** | **0.010250781** |
| **16629** |  | **POS** | **0.003447452** |
| **16635** |  | **POS** | **0.000391857** |
| **16636** |  | **POS** | **0.004508121** |
| **16638** |  | **POS** | **0.000443855** |
| **16640** |  | **POS** | **0.001271036** |
| **16641** |  | **POS** | **0.041519198** |
| **16642** |  | **POS** | **0.002012661** |
| **16650** |  | **NEG** | **0.013372769** |
| **16651** |  | **NEG** | **0.001513971** |
| **16653** |  | **NEG** | **0.018921193** |
| **16654** | **Flurochloridone** | **NEG** | **0.003100577** |
| **16657** |  | **NEG** | **0.007438224** |
| **16660** | **Iodoquinol** | **NEG** | **2.71848E-05** |
| **16661** |  | **NEG** | **0.006776229** |
| **16662** |  | **NEG** | **0.028052462** |
| **16665** |  | **POS** | **0.0389448** |
| **16669** |  | **POS** | **0.037724818** |
| **16670** |  | **NEG** | **0.018650879** |
| **16671** | **2-Hydroxymethylserine** | **NEG** | **0.001338442** |
| **16672** | **4,6-Dichloro-3-methylcatechol** | **NEG** | **0.048668316** |
| **16675** |  | **NEG** | **0.00321724** |
| **16677** |  | **NEG** | **0.026576541** |
| **16679** | **D-Glucosamine 6-phosphate** | **NEG** | **2.55215E-05** |
| **16688** |  | **NEG** | **0.017611185** |
| **16694** |  | **NEG** | **2.13E-05** |
| **16698** |  | **NEG** | **0.000619649** |
| **16699** |  | **NEG** | **0.033914983** |
| **16701** |  | **POS** | **0.000962271** |
| **16707** |  | **POS** | **0.000212296** |
| **16708** | **3-Iodo-4-hydroxyphenylpyruvate** | **NEG** | **0.000369183** |
| **16709** |  | **POS** | **0.000102015** |
| **16711** |  | **POS** | **0.047975956** |
| **16722** |  | **POS** | **0.042486129** |
| **16723** |  | **POS** | **0.032580302** |
| **16724** |  | **POS** | **0.033947145** |
| **16728** | **Neuromedin N** | **POS** | **0.01522151** |
| **16729** | **2,2,2-Trifluoroethyl** | **NEG** | **0.000480378** |
| **16730** |  | **NEG** | **0.007218576** |
| **16732** |  | **NEG** | **0.00122051** |
| **16736** |  | **NEG** | **0.000249034** |
| **16737** |  | **NEG** | **0.043446183** |
| **16738** |  | **NEG** | **0.003196608** |
| **16739** |  | **NEG** | **0.000250312** |
| **16740** |  | **NEG** | **0.019797649** |
| **16748** |  | **POS** | **0.039653515** |
| **16753** |  | **POS** | **0.00239915** |
| **16754** |  | **POS** | **0.000411352** |
| **16756** | **Bis(4'-chlorophenyl)acetate** | **POS** | **0.002738461** |
| **16758** |  | **POS** | **0.008299147** |
| **16760** |  | **POS** | **0.003312819** |
| **16765** |  | **POS** | **0.027708964** |
| **16766** |  | **POS** | **0.008633927** |
| **16767** |  | **NEG** | **0.000192764** |
| **16769** |  | **POS** | **0.000170163** |
| **16771** |  | **NEG** | **0.019334323** |
| **16772** |  | **NEG** | **0.00483827** |
| **16778** | **Campesteryl linoleate** | **NEG** | **0.000430023** |
| **16781** |  | **NEG** | **0.029650583** |
| **16782** | **Phosphoenolpyruvate** | **NEG** | **0.024608973** |
| **16788** |  | **NEG** | **0.008973457** |
| **16789** |  | **NEG** | **0.004998327** |
| **16793** |  | **NEG** | **0.049501099** |
| **16794** |  | **NEG** | **0.000308401** |
| **16795** |  | **NEG** | **2.85426E-05** |
| **16796** |  | **NEG** | **2.05514E-05** |
| **16798** |  | **NEG** | **0.00806523** |
| **16801** |  | **NEG** | **0.00226284** |
| **16802** |  | **NEG** | **0.004332197** |
| **16803** |  | **NEG** | **0.024782763** |
| **16806** |  | **NEG** | **0.003070525** |
| **16807** |  | **NEG** | **0.000183382** |
| **16813** |  | **NEG** | **0.000117465** |
| **16814** |  | **NEG** | **0.008415331** |
| **16815** |  | **NEG** | **0.001184862** |
| **16816** |  | **NEG** | **0.000869162** |
| **16822** |  | **NEG** | **0.000840677** |
| **16823** |  | **NEG** | **0.012425243** |
| **16824** | **DG(18:0/0:0/20:3n9)** | **NEG** | **0.010828669** |
| **16825** | **4-[2-[(E)-Octadec-9-enoyl]oxy-3-[(Z)-octadec-9-enoyl]oxypropoxy]-4-oxobutanoic acid** | **NEG** | **0.002021606** |
| **16831** |  | **NEG** | **0.000147714** |
| **16833** |  | **NEG** | **0.007285606** |
| **16834** |  | **NEG** | **0.027105565** |
| **16835** |  | **NEG** | **0.034049922** |
| **16838** |  | **NEG** | **0.024589821** |
| **16841** |  | **NEG** | **0.045182215** |
| **16842** |  | **NEG** | **0.014316918** |
| **16843** |  | **NEG** | **0.001854246** |
| **16845** |  | **NEG** | **0.025874636** |
| **16846** |  | **NEG** | **0.048648469** |
| **16847** |  | **NEG** | **0.000225525** |
| **16849** |  | **NEG** | **0.049874531** |
| **16850** |  | **NEG** | **0.004278987** |
| **16851** |  | **NEG** | **0.000409591** |
| **16853** |  | **NEG** | **0.009681742** |
| **16855** |  | **NEG** | **0.005625755** |
| **16856** |  | **NEG** | **0.018068239** |
| **16858** |  | **NEG** | **0.02927536** |
| **16859** |  | **NEG** | **5.68213E-05** |
| **16861** |  | **NEG** | **0.018015342** |
| **16863** |  | **NEG** | **0.002557191** |
| **16864** |  | **NEG** | **0.03770311** |
| **16865** |  | **NEG** | **0.000100055** |
| **16871** | **Chlorin E6** | **NEG** | **0.016268687** |
| **16873** | **Perfluorotridecanoic acid** | **NEG** | **0.000230651** |
| **16874** | **PA(21:0/20:3(5Z,8Z,11Z)-O(14R,15S))** | **NEG** | **0.000175548** |
| **16875** |  | **POS** | **0.000397294** |
| **16876** |  | **POS** | **0.008425256** |
| **16878** | **Sulfite** | **POS** | **8.89817E-06** |
| **16886** |  | **POS** | **0.00054813** |
| **16887** |  | **POS** | **0.002263188** |
| **16888** | **Imidazotetrazinone** | **POS** | **5.39688E-10** |
| **16889** |  | **POS** | **0.000525138** |
| **16892** |  | **POS** | **0.022406561** |
| **16895** | **L-Selenomethionine** | **POS** | **8.85505E-05** |
| **16900** |  | **POS** | **0.040105244** |
| **16901** |  | **POS** | **8.93723E-05** |
| **16902** |  | **POS** | **0.000281761** |
| **16905** |  | **POS** | **0.001968636** |
| **16906** |  | **POS** | **0.007740618** |
| **16909** |  | **POS** | **0.039014007** |
| **16911** |  | **NEG** | **0.000292963** |
| **16913** |  | **NEG** | **0.035447708** |
| **16914** |  | **NEG** | **0.049056524** |
| **16916** |  | **NEG** | **0.02229682** |
| **16917** | **2-(3,5-Dichlorophenylcarbamoyl)-1,2-dimethylcyclopropane-1-carboxylic acid** | **NEG** | **2.07349E-05** |
| **16918** |  | **POS** | **0.009228017** |
| **16924** | **N-Nitrosomethylvinylamine** | **POS** | **2.60344E-05** |
| **16931** |  | **POS** | **0.000557309** |
| **16935** | **1,1,1-Trifluoro-3-hydroxypropan-2-one** | **POS** | **5.19975E-05** |
| **16938** | **Methyl 2-propenyl selenide** | **POS** | **0.000250918** |
| **16941** |  | **POS** | **1.0655E-05** |
| **16942** |  | **POS** | **0.03663772** |
| **16943** | **Se-Methyl-L-selenocysteine** | **POS** | **2.79922E-05** |
| **16945** |  | **POS** | **0.006711499** |
| **16948** |  | **POS** | **0.040265035** |
| **16949** |  | **POS** | **0.000140046** |
| **16951** |  | **POS** | **0.004684864** |
| **16952** |  | **POS** | **7.6193E-06** |
| **16954** |  | **POS** | **0.02057479** |
| **16956** |  | **POS** | **0.001056563** |
| **16957** |  | **POS** | **0.012484353** |
| **16959** |  | **POS** | **0.036792138** |
| **16961** |  | **POS** | **0.027544625** |
| **16968** |  | **POS** | **0.005857728** |
| **16969** |  | **NEG** | **0.029860607** |
| **16973** | **Azacyclotridec-1-en-2-amine, N-(2-phenylcyclopentyl)-, cis-** | **NEG** | **0.001705598** |
| **16974** |  | **NEG** | **0.003317532** |
| **16975** |  | **NEG** | **0.005895507** |
| **16978** | **(1S,3R,4R,5R)-1-[[(1R,2S)-2-(4-Chlorophenyl)cyclopropyl]methoxy]-3,4-dihydroxy-5-[(Z)-3-imidazo[4,5-b]pyridin-1-yl-3-phenylprop-2-enoyl]oxycyclohexane-1-carboxylic acid** | **NEG** | **0.001183348** |
| **16979** |  | **POS** | **0.000417882** |
| **16983** |  | **POS** | **0.022055485** |
| **16987** |  | **POS** | **0.002728054** |
| **16989** |  | **POS** | **0.018310822** |
| **16992** |  | **POS** | **0.002560414** |
| **16996** |  | **NEG** | **0.013176663** |
| **16999** |  | **NEG** | **3.90556E-05** |
| **17004** |  | **NEG** | **0.007571751** |
| **17005** |  | **NEG** | **0.020288175** |
| **17007** | **D-threo-isocitrate** | **POS** | **0.014373417** |
| **17009** |  | **POS** | **0.03898369** |
| **17015** | **Tetrafluoroethylene** | **NEG** | **0.010599182** |
| **17018** |  | **NEG** | **0.039617992** |
| **17021** |  | **NEG** | **0.000176532** |
| **17022** |  | **NEG** | **0.020131968** |
| **17023** |  | **NEG** | **0.000414253** |
| **17024** | **cis-Aconitate** | **NEG** | **0.001491172** |
| **17026** | **L-3,4-Dihydroxybutan-2-one 4-phosphate** | **NEG** | **0.000490062** |
| **17027** |  | **NEG** | **0.037500248** |
| **17028** |  | **NEG** | **0.030193237** |
| **17032** | **2-Iodophenol methyl ether** | **NEG** | **0.007330951** |
| **17033** |  | **NEG** | **0.023808792** |
| **17034** |  | **NEG** | **0.005142693** |
| **17035** |  | **NEG** | **0.013280108** |
| **17036** |  | **NEG** | **0.002002938** |
| **17037** |  | **NEG** | **0.011248043** |
| **17038** |  | **NEG** | **0.009181489** |
| **17039** |  | **NEG** | **0.009139294** |
| **17040** |  | **NEG** | **0.026264813** |
| **17043** |  | **NEG** | **0.000281459** |
| **17050** |  | **NEG** | **0.000978046** |
| **17051** |  | **NEG** | **0.00064492** |
| **17052** |  | **NEG** | **0.019840537** |
| **17053** |  | **NEG** | **0.0347764** |
| **17054** | **Perfluoroheptanoic acid** | **NEG** | **0.037034711** |
| **17055** |  | **NEG** | **0.032382635** |
| **17056** |  | **NEG** | **0.006580684** |
| **17058** |  | **NEG** | **0.006664876** |
| **17059** |  | **NEG** | **0.025260974** |
| **17065** |  | **NEG** | **0.014074048** |
| **17066** | **Encaleret** | **NEG** | **2.44726E-06** |
| **17067** |  | **NEG** | **0.001249342** |
| **17068** |  | **NEG** | **0.002528016** |
| **17070** |  | **NEG** | **0.006735098** |
| **17072** |  | **NEG** | **0.004804101** |
| **17073** |  | **NEG** | **0.026419743** |
| **17075** |  | **POS** | **0.002256503** |
| **17079** |  | **POS** | **0.000807318** |
| **17080** | **Tetratriacontanoic acid** | **POS** | **0.01520139** |
| **17083** |  | **NEG** | **0.003907738** |
| **17084** |  | **NEG** | **0.027038509** |
| **17086** |  | **NEG** | **0.030991773** |
| **17087** |  | **NEG** | **0.004974888** |
| **17088** |  | **NEG** | **0.000363159** |
| **17091** |  | **NEG** | **0.026893899** |
| **17094** |  | **NEG** | **0.000152002** |
| **17095** |  | **NEG** | **0.023673764** |
| **17096** |  | **NEG** | **0.012095128** |
| **17097** |  | **NEG** | **0.025084344** |
| **17098** |  | **NEG** | **0.002254437** |
| **17099** |  | **POS** | **0.044174222** |
| **17106** |  | **POS** | **0.010479515** |
| **17107** |  | **POS** | **0.002413004** |
| **17108** |  | **POS** | **0.001552881** |
| **17109** |  | **POS** | **0.010935994** |
| **17113** |  | **POS** | **0.011054544** |
| **17118** | **25-Methyl-21-tritriacontene-1,9,11-triol** | **POS** | **0.001653686** |
| **17119** | **3-heptaprenyl-4-hydroxybenzoate** | **POS** | **0.019015583** |
| **17120** | **Anhwiedelphinine** | **POS** | **0.037839008** |
| **17124** |  | **NEG** | **0.008253402** |
| **17127** | **Diloxanide furoate** | **NEG** | **0.026485383** |
| **17128** | **Iodoazomycin arabinoside** | **NEG** | **0.04759723** |
| **17131** | **Mordaein** | **NEG** | **0.006724866** |
| **17132** |  | **POS** | **6.17712E-05** |
| **17134** | **Oxazaphosphorine** | **POS** | **0.002081334** |
| **17135** | **Iminoglycine** | **POS** | **0.001277784** |
| **17137** |  | **POS** | **0.00105802** |
| **17138** |  | **POS** | **0.000585056** |
| **17139** |  | **POS** | **7.15686E-05** |
| **17141** |  | **POS** | **0.000399028** |
| **17142** |  | **POS** | **0.003086999** |
| **17143** |  | **POS** | **0.00025275** |
| **17144** |  | **POS** | **0.010302435** |
| **17146** |  | **POS** | **0.002420669** |
| **17147** |  | **POS** | **0.000408462** |
| **17151** |  | **POS** | **0.018567447** |
| **17153** |  | **POS** | **0.00528448** |
| **17154** | **4-Nitro-6-oxohepta-2,4-dienedioate** | **POS** | **0.005859544** |
| **17158** |  | **POS** | **0.001820751** |
| **17159** | **3,5-Dinitrosalicylic acid** | **POS** | **0.014858246** |
| **17160** |  | **POS** | **0.002016782** |
| **17162** |  | **POS** | **0.000227469** |
| **17163** | **Phosphohistidine** | **POS** | **0.001825582** |
| **17164** |  | **POS** | **0.001224533** |
| **17166** |  | **POS** | **0.000189532** |
| **17175** |  | **POS** | **0.041457803** |
| **17176** |  | **POS** | **0.00564194** |
| **17178** |  | **POS** | **0.005032227** |
| **17179** |  | **POS** | **0.000278319** |
| **17180** |  | **POS** | **0.001508799** |
| **17181** | **Fluazim** | **POS** | **0.006160885** |
| **17184** | **Viniferin-alpha** | **POS** | **0.011933226** |
| **17185** |  | **POS** | **0.000539428** |
| **17186** | **Nodulisporic acid** | **POS** | **0.00028227** |
| **17187** |  | **POS** | **0.004035733** |
| **17194** |  | **NEG** | **0.006546664** |
| **17195** |  | **NEG** | **1.50873E-05** |
| **17199** |  | **NEG** | **0.020673976** |
| **17202** |  | **POS** | **0.000479299** |
| **17203** |  | **POS** | **0.001151913** |
| **17207** |  | **POS** | **0.003275981** |
| **17209** |  | **POS** | **0.006242367** |
| **17210** | **MeOSuc-AAPA-CMK** | **POS** | **0.017337005** |
| **17213** | **Methylcellulose** | **POS** | **0.029336119** |
| **17214** |  | **NEG** | **0.009770939** |
| **17219** | **DG(16:0/24:1(15Z)/0:0)** | **NEG** | **0.02061545** |
| **17221** |  | **POS** | **0.00899938** |
| **17222** |  | **POS** | **0.020487613** |
| **17223** |  | **NEG** | **0.024638492** |
| **17224** |  | **NEG** | **0.017152823** |
| **17228** |  | **NEG** | **0.010645913** |
| **17230** |  | **NEG** | **0.017483099** |
| **17231** | **perfluorooctanesulfinic acid** | **NEG** | **0.029321205** |
| **17233** |  | **POS** | **0.000291231** |
| **17237** |  | **POS** | **0.002232978** |
| **17238** | **Iodohistamine** | **NEG** | **0.007001518** |
| **17239** |  | **NEG** | **0.041767997** |
| **17240** |  | **NEG** | **0.000627642** |
| **17241** |  | **NEG** | **4.799E-05** |
| **17243** |  | **NEG** | **0.028015727** |
| **17245** |  | **NEG** | **0.001433684** |
| **17247** |  | **NEG** | **0.001484585** |
| **17249** |  | **NEG** | **0.000101693** |
| **17250** |  | **NEG** | **0.038946343** |
| **17252** | **N-(3,5-Dichlorophenyl)succinimide** | **NEG** | **0.004133439** |
| **17254** |  | **NEG** | **0.010131791** |
| **17255** |  | **NEG** | **0.009207027** |
| **17260** |  | **NEG** | **0.017472476** |
| **17262** |  | **NEG** | **0.018609676** |
| **17264** |  | **NEG** | **0.014837444** |
| **17265** |  | **NEG** | **0.01478638** |
| **17268** |  | **NEG** | **0.020670824** |
| **17269** |  | **NEG** | **0.020182735** |
| **17270** |  | **NEG** | **0.020927941** |
| **17271** |  | **NEG** | **0.025083959** |
| **17272** |  | **NEG** | **0.00563444** |
| **17273** |  | **NEG** | **0.027731389** |
| **17274** |  | **NEG** | **0.015466893** |
| **17275** |  | **NEG** | **1.69671E-06** |
| **17277** |  | **NEG** | **0.006422926** |
| **17278** |  | **NEG** | **0.000133564** |
| **17280** |  | **NEG** | **0.032546382** |
| **17281** |  | **NEG** | **9.57352E-06** |
| **17282** |  | **NEG** | **0.029557868** |
| **17289** |  | **NEG** | **0.004513677** |
| **17290** |  | **NEG** | **0.001330869** |
| **17292** |  | **NEG** | **0.029429415** |
| **17295** |  | **NEG** | **1.2939E-06** |
| **17296** |  | **NEG** | **0.001584411** |
| **17297** |  | **NEG** | **0.002018443** |
| **17298** |  | **NEG** | **0.002415154** |
| **17301** | **Noviflumuron** | **NEG** | **0.043367607** |
| **17303** |  | **NEG** | **0.026340492** |
| **17304** |  | **NEG** | **0.005619649** |
| **17308** |  | **NEG** | **0.02213751** |
| **17310** |  | **NEG** | **0.003642717** |
| **17311** | **PE(18:0/18:0)** | **NEG** | **0.012489435** |
| **17312** |  | **NEG** | **0.018813571** |
| **17313** |  | **NEG** | **0.004638428** |
| **17314** |  | **NEG** | **0.012137581** |
| **17315** |  | **POS** | **0.006251588** |
| **17317** |  | **POS** | **0.027484595** |
| **17318** | **Etofylline clofibrate** | **POS** | **0.005320498** |
| **17320** |  | **NEG** | **0.00650112** |
| **17326** |  | **NEG** | **0.011603807** |
| **17327** |  | **NEG** | **0.006281397** |
| **17328** |  | **NEG** | **0.000392894** |
| **17329** |  | **POS** | **0.00474215** |
| **17333** |  | **POS** | **0.012075656** |
| **17334** |  | **POS** | **0.046190222** |
| **17335** |  | **POS** | **0.00344697** |
| **17336** |  | **POS** | **0.002795092** |
| **17345** |  | **POS** | **0.009465345** |
| **17350** |  | **NEG** | **0.005061024** |
| **17353** |  | **POS** | **0.003873542** |
| **17356** |  | **POS** | **0.004725958** |
| **17357** |  | **POS** | **6.57606E-05** |
| **17362** |  | **POS** | **0.010453627** |
| **17363** | **2-(4-Chlorophenoxy)propionic acid** | **POS** | **0.011875959** |
| **17366** |  | **POS** | **0.008793969** |
| **17370** |  | **POS** | **0.018111145** |
| **17372** |  | **POS** | **0.043563273** |
| **17375** |  | **POS** | **0.018563119** |
| **17377** |  | **POS** | **0.003541863** |
| **17379** |  | **POS** | **0.009233979** |
| **17381** |  | **POS** | **0.023738256** |
| **17386** | **Birabresib** | **POS** | **1.07585E-05** |
| **17388** |  | **POS** | **5.31983E-05** |
| **17393** | **CerP(d18:0/16:0)** | **POS** | **0.003931296** |
| **17395** | **PA(14:0/20:3(6,8,11)-OH(5))** | **POS** | **1.51201E-05** |
| **17396** | **Bisibuthiamine** | **POS** | **0.000956759** |
| **17397** | **Cer(d17:1/LTE4)** | **POS** | **0.024650168** |
| **17399** |  | **POS** | **0.004368582** |
| **17402** |  | **NEG** | **0.001391409** |
| **17403** |  | **NEG** | **0.004772287** |
| **17406** |  | **POS** | **0.000118077** |
| **17409** |  | **POS** | **0.019251948** |
| **17410** | **Orotate** | **POS** | **7.53678E-05** |
| **17413** |  | **POS** | **4.6959E-05** |
| **17415** |  | **POS** | **0.042446658** |
| **17417** | **4-Bromocatechol** | **POS** | **0.028185057** |
| **17423** |  | **POS** | **3.77336E-05** |
| **17431** |  | **POS** | **0.004990499** |
| **17432** |  | **POS** | **0.0013096** |
| **17436** |  | **POS** | **0.006240099** |
| **17439** |  | **POS** | **0.000569165** |
| **17440** |  | **POS** | **0.027260287** |
| **17441** |  | **POS** | **0.031329361** |
| **17442** |  | **POS** | **0.006790647** |
| **17443** | **1-Octadec-9-enoxyoctadec-9-ene** | **POS** | **2.27211E-05** |
| **17444** | **Cetyl recinoleate** | **POS** | **9.55659E-07** |
| **17445** |  | **POS** | **0.001222909** |
| **17446** |  | **POS** | **0.027089496** |
| **17447** | **DG(15:0/0:0/20:5n3)** | **POS** | **0.005172743** |
| **17451** | **Scopoloside II** | **POS** | **0.008573505** |
| **17452** |  | **POS** | **0.010445151** |
| **17453** |  | **POS** | **0.00943027** |
| **17455** |  | **NEG** | **0.01605086** |
| **17456** |  | **POS** | **0.015818577** |
| **17457** |  | **POS** | **9.54563E-05** |
| **17459** |  | **NEG** | **0.000258122** |
| **17460** | **2-Dehydro-3-deoxy-D-arabino-heptote 7-phosphate** | **NEG** | **0.000558524** |
| **17462** |  | **NEG** | **0.007922569** |
| **17463** |  | **NEG** | **0.000174975** |
| **17464** |  | **POS** | **0.005086744** |
| **17468** |  | **NEG** | **0.027540082** |
| **17469** | **N-methylethanolamine phosphate** | **NEG** | **0.022310447** |
| **17470** |  | **NEG** | **0.025444925** |
| **17473** |  | **NEG** | **0.039206884** |
| **17474** |  | **NEG** | **0.003022923** |
| **17475** |  | **NEG** | **0.020939976** |
| **17476** |  | **NEG** | **0.011038885** |
| **17478** |  | **NEG** | **0.012435603** |
| **17480** |  | **NEG** | **0.001200464** |
| **17482** |  | **NEG** | **0.012703664** |
| **17483** | **Disobutamide** | **NEG** | **1.73085E-05** |
| **17484** | **D-myo-inositol (1,2,3) trisphosphate** | **NEG** | **0.009426994** |
| **17485** |  | **NEG** | **1.09842E-05** |
| **17486** |  | **NEG** | **0.004021759** |
| **17487** |  | **NEG** | **0.001131337** |
| **17489** | **4-[[(2R)-1-(1-Benzothiophene-3-carbonyl)-2-methylazetidine-2-carbonyl]-[(3-chlorophenyl)methyl]amino]butanoic acid** | **NEG** | **0.000311804** |
| **17492** |  | **NEG** | **0.001022435** |
| **17495** | **Taranabant** | **POS** | **0.004596436** |
| **17496** |  | **POS** | **0.002016461** |
| **17499** | **1,2-Dinitroglycerin** | **NEG** | **0.015322093** |
| **17500** |  | **NEG** | **0.005304954** |
| **17501** |  | **NEG** | **0.000963179** |
| **17503** |  | **NEG** | **0.002327876** |
| **17505** | **Prochlorperazine Sulfoxide** | **NEG** | **0.000952562** |
| **17506** |  | **NEG** | **0.00357432** |
| **17507** | **Clindamycin** | **NEG** | **0.001117424** |
| **17508** |  | **NEG** | **0.000341797** |
| **17509** |  | **NEG** | **0.000756086** |
| **17510** |  | **NEG** | **0.011051457** |
| **17515** | **Phoenicoxanthin** | **NEG** | **0.000366809** |
| **17518** | **Allodesmosine** | **NEG** | **0.008881018** |
| **17519** | **Physagulin G** | **NEG** | **0.020939784** |
| **17520** |  | **NEG** | **0.016931509** |
| **17521** |  | **POS** | **0.002235205** |
| **17524** |  | **POS** | **0.000349942** |
| **17525** | **Calcium peroxide** | **POS** | **0.004309218** |
| **17529** |  | **POS** | **0.001015713** |
| **17532** | **Acetyl citrate** | **POS** | **9.01207E-06** |
| **17533** |  | **POS** | **0.009761141** |
| **17535** |  | **POS** | **0.000402266** |
| **17536** |  | **POS** | **0.003470063** |
| **17540** |  | **POS** | **0.000808084** |
| **17541** |  | **POS** | **0.017766997** |
| **17542** | **Fentin hydroxide** | **POS** | **0.049898433** |
| **17544** |  | **POS** | **0.004386381** |
| **17545** |  | **POS** | **3.57104E-05** |
| **17548** | **Torulene** | **POS** | **0.04155834** |
| **17549** |  | **POS** | **0.002496497** |
| **17550** |  | **POS** | **0.00096041** |
| **17551** |  | **POS** | **1.04868E-05** |
| **17552** |  | **NEG** | **8.12206E-06** |
| **17553** |  | **NEG** | **0.019253743** |
| **17556** |  | **POS** | **0.00600373** |
| **17559** | **5,6-Dihydrothymine** | **POS** | **1.30572E-05** |
| **17561** | **Fosamine** | **POS** | **0.000562343** |
| **17565** |  | **POS** | **0.029536866** |
| **17566** |  | **POS** | **0.004671495** |
| **17571** |  | **POS** | **0.024328346** |
| **17573** |  | **POS** | **0.001427914** |
| **17578** |  | **POS** | **0.015782039** |
| **17579** |  | **POS** | **3.73794E-05** |
| **17580** |  | **POS** | **0.007198067** |
| **17582** |  | **POS** | **2.25636E-06** |
| **17584** |  | **POS** | **2.91585E-05** |
| **17585** |  | **POS** | **0.011039744** |
| **17586** |  | **POS** | **0.001939682** |
| **17587** |  | **POS** | **0.010033077** |
| **17589** | **DG(15:0/0:0/18:4n3)** | **POS** | **0.000855995** |
| **17591** | **Cer(d17:1/20:5(7Z,9Z,11E,13E,17Z)-3OH(5,6,15))** | **POS** | **0.000223323** |
| **17592** | **Chlorophyllide b** | **POS** | **2.62625E-05** |
| **17594** | **DG(9D3/9D3/0:0)** | **POS** | **0.000398794** |
| **17596** | **PE(14:1(9Z)/16:1(9Z))** | **POS** | **0.000139783** |
| **17597** | **PE(14:0/18:3(6Z,9Z,12Z))** | **POS** | **0.002067951** |
| **17598** |  | **POS** | **0.000678688** |
| **17599** | **Eribulin** | **POS** | **8.79047E-06** |
| **17600** |  | **POS** | **0.01670308** |
| **17602** | **Niaziminin A** | **POS** | **0.001248251** |
| **17603** |  | **POS** | **8.82068E-05** |
| **17606** |  | **POS** | **0.004905549** |
| **17607** |  | **POS** | **0.006185526** |
| **17608** |  | **POS** | **0.002789277** |
| **17609** |  | **NEG** | **0.036799233** |
| **17610** | **Tebufenpyrad** | **NEG** | **0.002320809** |
| **17611** |  | **NEG** | **0.011539071** |
| **17612** |  | **NEG** | **1.17259E-05** |
| **17614** |  | **NEG** | **0.000279217** |
| **17615** |  | **NEG** | **0.015886479** |
| **17616** |  | **NEG** | **0.000330752** |
| **17617** | **beta-Casomorphin-7** | **NEG** | **0.002995447** |
| **17620** |  | **NEG** | **0.025189848** |
| **17624** |  | **POS** | **0.001128525** |
| **17626** | **Fenclorim** | **POS** | **0.000357341** |
| **17627** |  | **POS** | **0.006705326** |
| **17628** | **Isosorbide dinitrate** | **POS** | **0.008539685** |
| **17629** |  | **POS** | **0.021924932** |
| **17630** |  | **POS** | **0.004946733** |
| **17631** | **Chlorobactene** | **POS** | **0.015420156** |
| **17632** | **1,2-Epoxy-1,2,7,7',8,8',11,12-octahydro-psi,psi-carotene** | **POS** | **0.000254769** |
| **17633** | **DG(10:0/20:4(6Z,8E,10E,14Z)-2OH(5S,12R)/0:0)** | **POS** | **0.012604068** |
| **17635** |  | **POS** | **0.000242103** |
| **17636** | **PGP(i-12:0/18:1(12Z)-O(9S,10R))** | **POS** | **8.78593E-05** |
| **17638** |  | **POS** | **0.003931152** |
| **17639** |  | **POS** | **0.000138151** |
| **17642** |  | **NEG** | **0.013037659** |
| **17643** | **5,7-Dichloropyrazolo[1,5-a]pyrimidine** | **POS** | **0.024665909** |
| **17645** |  | **POS** | **0.042948126** |
| **17646** |  | **POS** | **0.000743192** |
| **17649** |  | **NEG** | **0.000684042** |
| **17652** | **2-Hexadecyloctadec-9-enal** | **NEG** | **0.021097573** |
| **17653** | **Isopropyl-diiodothyronine** | **NEG** | **0.002937151** |
| **17654** | **4-Fluorocyclohexane-1-carboxylic acid** | **POS** | **0.021724014** |
| **17656** |  | **POS** | **0.029091872** |
| **17657** |  | **POS** | **0.001205371** |
| **17658** |  | **POS** | **0.027551992** |
| **17662** |  | **NEG** | **0.000478439** |
| **17664** |  | **NEG** | **8.71284E-05** |
| **17667** |  | **NEG** | **0.04314963** |
| **17668** |  | **NEG** | **0.040580629** |
| **17669** | **Benoxacor** | **NEG** | **0.031432115** |
| **17671** |  | **NEG** | **0.000803865** |
| **17672** |  | **NEG** | **0.007305613** |
| **17673** |  | **NEG** | **0.030237162** |
| **17676** |  | **NEG** | **0.027931208** |
| **17678** | **Tetrachlorosalicylanilide** | **NEG** | **0.008058454** |
| **17679** |  | **NEG** | **0.034558225** |
| **17681** |  | **NEG** | **0.016953138** |
| **17684** | **Cholesteryl chloride** | **NEG** | **0.00462029** |
| **17685** |  | **NEG** | **0.00323454** |
| **17686** |  | **NEG** | **0.00090234** |
| **17687** |  | **NEG** | **0.004344596** |
| **17688** |  | **NEG** | **0.025518695** |
| **17691** |  | **NEG** | **0.001473959** |
| **17692** |  | **NEG** | **0.000144173** |
| **17693** |  | **NEG** | **0.017649021** |
| **17694** |  | **NEG** | **0.000384494** |
| **17695** |  | **NEG** | **0.000397495** |
| **17697** | **3-Hexaprenyl-4,5-dihydroxybenzoate** | **NEG** | **0.01748203** |
| **17700** | **DG(12:0/20:3(8Z,11Z,14Z)-2OH(5,6)/0:0)** | **NEG** | **0.040622167** |
| **17703** | **LysoPC(24:0/0:0)** | **NEG** | **9.03881E-06** |
| **17704** |  | **NEG** | **0.027577229** |
| **17706** | **Janthitrem G** | **NEG** | **3.76726E-05** |
| **17707** | **Nummularine A** | **NEG** | **0.049129874** |
| **17710** | **Binaltorphimine** | **NEG** | **0.012929747** |
| **17713** | **Cheirotoxol** | **NEG** | **0.001843077** |
| **17714** | **Jubanine B** | **NEG** | **0.009382123** |
| **17715** |  | **NEG** | **4.71693E-05** |
| **17716** | **Timosaponin A-III** | **NEG** | **0.023930166** |
| **17717** |  | **NEG** | **0.035102252** |
| **17719** |  | **NEG** | **0.022151112** |
| **17722** |  | **NEG** | **0.035616152** |
| **17724** | **ent-Fisetinidol-(4beta->8)-catechin-(6->4beta)-ent-fisetinidol** | **NEG** | **0.002869337** |
| **17725** | **Precorrin 2** | **NEG** | **0.012168435** |
| **17727** |  | **NEG** | **0.011009345** |
| **17729** | **3-hydroxyocta-2,5-dienoyl-CoA** | **POS** | **0.013128227** |
| **17730** |  | **NEG** | **0.031679959** |
| **17734** |  | **NEG** | **5.81726E-05** |
| **17737** |  | **NEG** | **0.040427317** |
| **17739** |  | **NEG** | **0.004767641** |
| **17740** | **Oolonghomobisflavan A** | **NEG** | **0.016702924** |
| **17742** |  | **POS** | **7.99293E-05** |
| **17743** |  | **POS** | **0.012717245** |
| **17745** |  | **POS** | **0.007449555** |
| **17747** |  | **POS** | **0.019083864** |
| **17748** |  | **POS** | **0.016477624** |
| **17749** | **Calcium tartrate** | **POS** | **0.039069242** |
| **17750** |  | **POS** | **0.01452992** |
| **17751** |  | **POS** | **0.002338935** |
| **17754** |  | **POS** | **0.013103901** |
| **17756** |  | **POS** | **7.59832E-05** |
| **17761** |  | **NEG** | **0.000499414** |
| **17762** |  | **NEG** | **0.048159559** |
| **17764** |  | **NEG** | **0.001189932** |
| **17765** |  | **POS** | **0.015182592** |
| **17766** | **2-Cyanoethyl dihydrogen phosphate** | **POS** | **0.015468233** |
| **17769** | **Glycerone phosphate** | **POS** | **0.00188271** |
| **17770** | **6-Fluoropyridoxol** | **POS** | **0.019427064** |
| **17771** | **Octafluorocyclobutane** | **POS** | **0.001446734** |
| **17772** |  | **POS** | **0.028859428** |
| **17773** |  | **POS** | **0.005903072** |
| **17776** |  | **POS** | **0.001744205** |
| **17777** | **Quipril hydrochloride** | **POS** | **0.017199637** |
| **17778** | **Vemurafenib** | **POS** | **0.00012393** |
| **17779** | **N-Nervonoyl Phenylalanine** | **POS** | **0.013191422** |
| **17780** |  | **POS** | **0.014861494** |
| **17781** |  | **POS** | **0.002004116** |
| **17782** | **27-O-Demethylrifamycin SV** | **POS** | **0.001500931** |
| **17783** |  | **POS** | **0.033079135** |
| **17785** | **PE(14:1(9Z)/18:2(10E,12Z)+=O(9))** | **POS** | **4.80802E-06** |
| **17786** |  | **POS** | **0.029086493** |
| **17787** |  | **POS** | **0.021727202** |
| **17788** |  | **POS** | **0.007663925** |
| **17789** |  | **POS** | **0.002661133** |
| **17790** | **3-trans,5-cis-Octadienoyl-CoA** | **POS** | **0.007946424** |
| **17791** |  | **POS** | **6.44154E-07** |
| **17792** |  | **POS** | **0.015350837** |
| **17793** |  | **POS** | **0.031470987** |
| **17794** |  | **POS** | **0.004787445** |
| **17795** |  | **POS** | **0.009193278** |
| **17796** |  | **POS** | **0.014669382** |
| **17797** |  | **NEG** | **0.008608615** |
| **17804** | **Neoarctin A** | **NEG** | **0.007766507** |
| **17805** | **Methanofuran** | **NEG** | **0.03694172** |
| **17808** |  | **NEG** | **0.019453537** |
| **17809** |  | **NEG** | **0.001598323** |
| **17812** |  | **NEG** | **0.00515058** |
| **17813** |  | **NEG** | **0.021349282** |
| **17820** |  | **NEG** | **1.68855E-05** |
| **17821** |  | **NEG** | **0.000465666** |
| **17824** |  | **NEG** | **0.02402448** |
| **17826** |  | **POS** | **0.004512123** |
| **17829** | **D-sedoheptulose-1,7-bisphosphate** | **POS** | **0.022083715** |
| **17831** | **5-Chloro-2,4-dihydroxy-6-methyl-3-[(2E,4Z)-3-methyl-5-(1,2,6-trimethyl-3-oxocyclohexyl)penta-2,4-dienyl]benzaldehyde** | **POS** | **0.008750481** |
| **17832** | **DG(13:0/22:6(5Z,7Z,10Z,13Z,16Z,19Z)-OH(4)/0:0)** | **POS** | **1.57283E-05** |
| **17833** | **Gluten exorphin C** | **POS** | **0.005409241** |
| **17834** | **Sialyl-Lewis X** | **POS** | **0.029743309** |
| **17836** | **Cryolite** | **NEG** | **0.004845446** |
| **17838** |  | **NEG** | **0.000148288** |
| **17842** |  | **NEG** | **0.000261172** |
| **17843** |  | **NEG** | **0.000411438** |
| **17844** |  | **NEG** | **0.000746917** |
| **17845** |  | **NEG** | **0.000672403** |
| **17847** | **Pyrrolnitrin** | **NEG** | **0.000468309** |
| **17848** | **Disul** | **NEG** | **0.03955084** |
| **17849** |  | **NEG** | **0.005582031** |
| **17851** |  | **NEG** | **0.008175448** |
| **17852** |  | **NEG** | **0.024249714** |
| **17854** |  | **NEG** | **0.038772581** |
| **17859** |  | **NEG** | **0.007895081** |
| **17860** |  | **NEG** | **9.94781E-05** |
| **17863** |  | **NEG** | **0.005993362** |
| **17864** |  | **NEG** | **0.001343761** |
| **17865** |  | **NEG** | **0.000107401** |
| **17871** | **2-Chloro-N-[1-[(2R)-2,3-dihydroxypropyl]-2-oxo-3,4-dihydroquinolin-3-yl]-6H-thieno[2,3-b]pyrrole-5-carboxamide** | **NEG** | **0.014983379** |
| **17874** | **Moxifloxacin hydrochloride** | **NEG** | **4.45576E-05** |
| **17875** |  | **NEG** | **0.008722556** |
| **17878** | **Sertindole** | **NEG** | **0.005069013** |
| **17879** |  | **NEG** | **0.001367734** |
| **17881** | **Luprostiol** | **NEG** | **0.030687211** |
| **17882** | **Suvorexant** | **NEG** | **0.019254491** |
| **17883** | **Flucloxacillin** | **NEG** | **0.000651265** |
| **17884** |  | **NEG** | **0.005587108** |
| **17885** |  | **NEG** | **0.001220304** |
| **17886** |  | **NEG** | **0.00150651** |
| **17887** |  | **NEG** | **2.21441E-05** |
| **17889** |  | **NEG** | **3.94411E-05** |
| **17891** |  | **NEG** | **9.56987E-05** |
| **17892** | **Benoxaprofen glucuronide** | **NEG** | **0.002453341** |
| **17893** |  | **NEG** | **0.031237669** |
| **17895** |  | **NEG** | **0.00030106** |
| **17898** |  | **NEG** | **0.001731411** |
| **17899** |  | **NEG** | **8.01121E-06** |
| **17900** |  | **NEG** | **0.007520263** |
| **17903** | **Butter acids** | **NEG** | **0.000276295** |
| **17904** |  | **NEG** | **0.000369602** |
| **17906** | **Nervonyl carnitine** | **NEG** | **0.008958443** |
| **17908** |  | **NEG** | **0.000613364** |
| **17914** | **DG(14:0/16:1(9Z)/0:0)** | **NEG** | **0.000169011** |
| **17915** | **all-trans-zeta-Carotene** | **NEG** | **0.028093348** |
| **17916** |  | **NEG** | **0.005543793** |
| **17917** | **Ribosylhopane** | **NEG** | **9.69846E-06** |
| **17918** |  | **NEG** | **0.002634423** |
| **17919** | **Aminobacteriohopanetriol** | **NEG** | **0.006769032** |
| **17920** |  | **NEG** | **0.000372118** |
| **17923** |  | **NEG** | **0.002003404** |
| **17924** | **TG(10:0/10:0/10:0)** | **NEG** | **0.0055589** |
| **17925** | **3-O-beta-D-glucosyl-brassicasterol** | **NEG** | **9.32895E-05** |
| **17926** | **3,4-dihydroxy-5-all-trans-hexaprenylbenzoate** | **NEG** | **0.001057219** |
| **17927** |  | **NEG** | **0.001043839** |
| **17928** | **Cer(d18:1/18:1(9Z))** | **NEG** | **0.000217609** |
| **17929** |  | **NEG** | **0.030459916** |
| **17931** |  | **NEG** | **0.000407043** |
| **17932** | **Pancuronium** | **NEG** | **0.002302676** |
| **17936** | **3',4'-Dihydrorhodovibrin** | **NEG** | **0.000262365** |
| **17939** | **Jurubine** | **NEG** | **0.000176359** |
| **17940** | **C-Curarine** | **NEG** | **2.1831E-05** |
| **17941** | **DG(14:0/20:0/0:0)** | **NEG** | **0.009348762** |
| **17942** | **Garcinol** | **NEG** | **4.2111E-05** |
| **17944** | **PA(10:0/19:0)** | **NEG** | **0.002509902** |
| **17946** | **DG(14:0/22:5(4Z,7Z,10Z,13Z,16Z)/0:0)** | **NEG** | **0.000837262** |
| **17948** | **Z-Ile-Glu(O-t-butyl)-Ala-Leucinal** | **NEG** | **9.14719E-06** |
| **17949** |  | **NEG** | **9.91731E-05** |
| **17951** | **Peridinin** | **NEG** | **0.003415962** |
| **17952** | **Cer(d18:1/20:5(7Z,9Z,11E,13E,17Z)-3OH(5,6,15))** | **NEG** | **3.8895E-05** |
| **17953** | **Oleanoic acid 3-O-glucuronide** | **NEG** | **0.031389481** |
| **17954** |  | **NEG** | **0.045309561** |
| **17956** | **Lyciumoside III** | **NEG** | **0.00518725** |
| **17958** |  | **NEG** | **0.000362891** |
| **17959** |  | **NEG** | **0.001461865** |
| **17960** |  | **NEG** | **0.005481658** |
| **17962** |  | **NEG** | **0.013765835** |
| **17964** | **Dihydro-alpha-ergocryptine mesylate** | **NEG** | **9.6522E-05** |
| **17965** |  | **NEG** | **4.32514E-05** |
| **17967** | **Canarigenin 3-[glucosyl-(1->4)-6-deoxy-alloside]** | **NEG** | **0.039298234** |
| **17968** | **PA(14:0/20:3(6,8,11)-OH(5))** | **NEG** | **0.012382614** |
| **17969** |  | **NEG** | **9.10768E-05** |
| **17971** |  | **NEG** | **0.004535493** |
| **17972** |  | **NEG** | **0.00227239** |
| **17973** |  | **NEG** | **0.00684479** |
| **17974** | **Bisibuthiamine** | **NEG** | **0.000423427** |
| **17976** |  | **NEG** | **0.008856631** |
| **17977** |  | **NEG** | **0.022165422** |
| **17979** |  | **NEG** | **0.014793647** |
| **17981** |  | **NEG** | **0.004338454** |
| **17982** | **PG(i-12:0/5-iso PGF2VI)** | **NEG** | **0.006296814** |
| **17983** | **CE-108** | **NEG** | **0.017201142** |
| **17985** | **Z-Ala-arg-arg-afc** | **NEG** | **9.63515E-06** |
| **17986** | **3'-N-Debenzoyltaxol** | **NEG** | **2.06606E-05** |
| **17987** |  | **NEG** | **6.43127E-05** |
| **17988** | **Rifamycin B** | **NEG** | **0.010501155** |
| **17989** | **Decaglycerol** | **NEG** | **0.001807751** |
| **17990** | **N-Succinyl-Leu-Leu-Val-Tyr-7-Amido-4-Methylcoumarin, >=90% (HPLC)** | **NEG** | **0.01278911** |
| **17991** |  | **NEG** | **0.000108292** |
| **17992** |  | **NEG** | **0.010913743** |
| **17993** |  | **NEG** | **0.000277638** |
| **17995** |  | **NEG** | **0.000875504** |
| **17996** |  | **NEG** | **0.035249272** |
| **17998** | **Heptacarboxylporphyrin III** | **NEG** | **0.01159303** |
| **17999** |  | **NEG** | **0.002502192** |
| **18000** |  | **NEG** | **0.005633583** |
| **18001** |  | **NEG** | **0.021751569** |
| **18003** |  | **NEG** | **0.005477673** |
| **18004** |  | **NEG** | **0.018659094** |
| **18005** |  | **NEG** | **0.000548713** |
| **18006** | **Z-Ile-Glu-Thr-Asp 7-amido-4-trifluoromethylcoumarin** | **NEG** | **0.012153195** |
| **18007** |  | **NEG** | **0.005406549** |
| **18008** |  | **NEG** | **0.000677094** |
| **18009** | **Alatanin 2** | **NEG** | **0.000377071** |
| **18010** |  | **NEG** | **0.006843512** |
| **18011** |  | **NEG** | **0.007328762** |
| **18012** |  | **NEG** | **0.004652437** |
| **18013** | **Pradimicin A** | **NEG** | **0.007133496** |
| **18014** |  | **NEG** | **0.004320755** |
| **18015** |  | **NEG** | **0.001147814** |
| **18017** | **Lewis X antigen** | **NEG** | **0.001668765** |
| **18018** | **Betanidin 5-[E-feruloyl-(->5)-apiosyl-(1->2)-glucoside]** | **NEG** | **0.02765222** |
| **18019** |  | **NEG** | **0.007272902** |
| **18020** | **Epiafzelechin-(4beta->6)-epicatechin 3,3'-digallate** | **NEG** | **0.000103563** |
| **18021** |  | **NEG** | **0.016131845** |
| **18022** | **Tertin C5** | **NEG** | **0.003310534** |
| **18024** |  | **NEG** | **0.039194821** |
| **18025** |  | **NEG** | **0.022170191** |
| **18026** | **[Gallocatechin(4alpha->8)]2catechin** | **NEG** | **0.034726724** |
| **18027** |  | **NEG** | **0.000104878** |
| **18028** | **(2E,4E,7E)-nona-2,4,7-trienoyl-CoA** | **NEG** | **0.0149185** |
| **18029** |  | **NEG** | **0.000145388** |
| **18030** |  | **NEG** | **0.00166702** |
| **18034** | **Isochestanin** | **NEG** | **0.005876107** |
| **18036** |  | **NEG** | **0.001157654** |
| **18037** |  | **NEG** | **0.025397285** |
| **18038** |  | **NEG** | **0.018715591** |
| **18041** |  | **POS** | **0.013199897** |
| **18042** | **9-Chloro-11beta,17beta-dihydroxy-17-methylandrost-4-en-3-one** | **POS** | **4.23227E-05** |
| **18043** |  | **POS** | **0.000188186** |
| **18044** |  | **POS** | **0.001590353** |
| **18045** |  | **POS** | **0.02256257** |
| **18046** |  | **POS** | **0.030797882** |
| **18048** |  | **POS** | **0.027468912** |
| **18050** | **2-Hydroxypropyl starch** | **POS** | **0.012321303** |
| **18053** | **Anhydrochlortetracycline** | **NEG** | **0.000148765** |
| **18054** |  | **POS** | **0.001121603** |
| **18060** |  | **POS** | **0.001743869** |
| **18061** | **Heptacarboxylic porphyrin** | **POS** | **0.021564475** |
| **18066** |  | **POS** | **0.000189424** |
| **18071** | **Nebracetam** | **POS** | **0.033214217** |
| **18076** |  | **POS** | **0.02449643** |
| **18079** |  | **POS** | **0.014282876** |
| **18080** |  | **POS** | **0.000102386** |
| **18081** |  | **POS** | **0.001619454** |
| **18082** |  | **POS** | **0.016887062** |
| **18084** | **Luprostiol** | **POS** | **1.47566E-05** |
| **18085** |  | **POS** | **0.0029111** |
| **18086** |  | **POS** | **0.002758247** |
| **18087** | **Bezepril hydrochloride** | **POS** | **0.017957322** |
| **18088** | **Ponesimod** | **POS** | **0.004689968** |
| **18089** | **Oxazepam glucuronide** | **POS** | **5.27042E-05** |
| **18090** | **Fucofuroeckol B** | **POS** | **0.002061018** |
| **18091** | **Sorafenib N-oxide** | **POS** | **3.5152E-05** |
| **18092** |  | **POS** | **0.001212716** |
| **18093** |  | **POS** | **0.003379186** |
| **18094** |  | **POS** | **0.00012172** |
| **18095** |  | **POS** | **8.68307E-05** |
| **18097** |  | **POS** | **6.42846E-05** |
| **18098** | **Behenoyl-arabinofuranosyl-cytosine** | **POS** | **4.02744E-05** |
| **18100** |  | **POS** | **0.006519349** |
| **18102** | **12-O-Tetradecanoylphorbol 13-acetate** | **POS** | **0.009969715** |
| **18103** | **Cer(d18:1/22:6(5Z,7Z,10Z,13Z,16Z,19Z)-OH(4))** | **POS** | **0.001123748** |
| **18104** | **4-Methoxycinnamoyloleanolic acid methyl ester** | **POS** | **3.82217E-05** |
| **18106** | **Veratridine** | **POS** | **0.031388952** |
| **18107** | **N-Benzyladriamycin-14-valerate** | **POS** | **0.004785564** |
| **18108** | **Danoprevir** | **POS** | **0.001655759** |
| **18109** |  | **POS** | **3.30492E-05** |
| **18110** | **TS-TM-calix(4)arene** | **POS** | **0.002261983** |
| **18111** |  | **POS** | **0.020428685** |
| **18112** |  | **POS** | **0.009321993** |
| **18114** | **3-Oxo-5,6-dehydrosuberyl-CoA semialdehyde** | **POS** | **0.003677104** |
| **18115** | **Nitrogenase** | **POS** | **0.016291041** |
| **18122** | **4-(2-(1-(4-Chlorocinnamyl)piperazin-4-yl)ethyl)benzoate** | **NEG** | **0.04080538** |
| **18123** |  | **NEG** | **0.005179592** |
| **18126** | **Naphthoquine** | **NEG** | **0.014078663** |
| **18128** |  | **NEG** | **0.031978469** |
| **18129** |  | **NEG** | **0.010760661** |
| **18131** |  | **NEG** | **0.035878416** |
| **18132** |  | **NEG** | **0.001021374** |
| **18133** |  | **NEG** | **0.000232396** |
| **18135** |  | **NEG** | **0.013153713** |
| **18136** |  | **NEG** | **0.000127372** |
| **18138** |  | **NEG** | **0.012863853** |
| **18139** | **DG(10:0/20:3(8Z,11Z,14Z)-2OH(5,6)/0:0)** | **NEG** | **0.041943805** |
| **18141** |  | **NEG** | **0.000317638** |
| **18143** | **LysoPC(26:1(5Z)/0:0)** | **NEG** | **0.003260564** |
| **18145** |  | **NEG** | **0.032800987** |
| **18146** | **PGP(a-13:0/i-12:0)** | **NEG** | **0.001190484** |
| **18148** | **Digitalin** | **NEG** | **0.015458538** |
| **18149** | **PA(14:0/PGE2)** | **NEG** | **0.017458682** |
| **18150** |  | **NEG** | **0.000452822** |
| **18151** |  | **NEG** | **0.018397723** |
| **18152** |  | **NEG** | **0.029865733** |
| **18154** |  | **NEG** | **0.000873784** |
| **18155** |  | **NEG** | **0.046596014** |
| **18156** | **Quin-2 acetoxymethyl ester** | **NEG** | **0.008332035** |
| **18157** |  | **NEG** | **0.000527877** |
| **18158** |  | **NEG** | **0.025359047** |
| **18160** |  | **NEG** | **0.004879729** |
| **18163** |  | **NEG** | **0.003914681** |
| **18164** |  | **NEG** | **0.001651722** |
| **18167** |  | **POS** | **0.010363234** |
| **18170** | **4-Hydroxybutanoic acid** | **POS** | **0.000440307** |
| **18171** |  | **POS** | **0.048551315** |
| **18172** |  | **POS** | **0.000474354** |
| **18173** |  | **POS** | **0.029057345** |
| **18174** | **3-Bromo-2Z-heptenoic acid** | **POS** | **0.018505679** |
| **18178** |  | **POS** | **0.003854435** |
| **18179** |  | **POS** | **0.00268925** |
| **18182** |  | **POS** | **0.013304717** |
| **18184** |  | **POS** | **0.000993079** |
| **18185** | **N-(4-(2-Chlorophenyl)-6,7-dimethyl-3-quinolyl)-N'-(2,4-difluorophenyl)urea** | **POS** | **0.023491196** |
| **18186** | **Bis(2,4,6-trichlorophenyl) oxalate** | **POS** | **0.016166005** |
| **18187** |  | **POS** | **0.008314846** |
| **18188** |  | **POS** | **2.71722E-05** |
| **18189** | **5-Chloromethylfluorescein diacetate** | **POS** | **0.000341959** |
| **18190** | **beclomethasone propionate** | **POS** | **7.7935E-05** |
| **18192** |  | **POS** | **0.001271766** |
| **18193** | **Acetyl-Tyr-Val-Ala-Asp-chloromethylketone** | **POS** | **5.42134E-05** |
| **18194** | **Cer(d17:1/18:2(10E,12Z)+=O(9))** | **POS** | **0.029243635** |
| **18195** | **Cer(d18:1/18:0)** | **POS** | **0.000258833** |
| **18196** | **Cer(d17:1/18:1(12Z)-2OH(9,10))** | **POS** | **0.000267478** |
| **18197** | **Polidocanol** | **POS** | **0.000247605** |
| **18200** |  | **POS** | **0.003598218** |
| **18201** |  | **POS** | **0.001621559** |
| **18202** | **Naloxonazine** | **POS** | **0.00229692** |
| **18203** | **Barbinine** | **POS** | **0.001031961** |
| **18208** | **Monoaspartyl chlorin e6** | **POS** | **0.001241527** |
| **18209** |  | **POS** | **0.000450186** |
| **18210** | **Alliospiroside C** | **POS** | **0.025824244** |
| **18211** | **Boccorborine A** | **POS** | **0.006871219** |
| **18213** | **Phomopsin B** | **POS** | **0.005976398** |
| **18214** |  | **POS** | **0.014695599** |
| **18216** |  | **POS** | **0.002878461** |
| **18218** | **UDP-3-O-(3-hydroxytetradecanoyl)-N-acetylglucosamine** | **POS** | **0.011562732** |
| **18219** |  | **POS** | **0.002878749** |
| **18220** |  | **POS** | **0.000330179** |
| **18221** |  | **POS** | **0.012706047** |
| **18226** |  | **POS** | **0.017106997** |
| **18229** |  | **POS** | **0.032619707** |
| **18233** |  | **NEG** | **0.022194998** |
| **18234** | **Reduced haloperidol** | **NEG** | **0.00017218** |
| **18238** |  | **POS** | **0.000245289** |
| **18242** |  | **POS** | **1.53638E-05** |
| **18244** |  | **POS** | **0.021138755** |
| **18245** |  | **POS** | **0.036304854** |
| **18247** |  | **NEG** | **0.017851724** |
| **18249** |  | **NEG** | **0.005263785** |
| **18251** |  | **NEG** | **0.005377238** |
| **18253** |  | **NEG** | **0.002488944** |
| **18254** |  | **NEG** | **0.001048209** |
| **18255** |  | **POS** | **7.38885E-06** |
| **18256** |  | **POS** | **0.027751421** |
| **18257** |  | **POS** | **0.00010776** |
| **18258** |  | **POS** | **0.00263428** |
| **18259** | **Eupachloroxin** | **POS** | **0.012130278** |
| **18260** |  | **POS** | **0.003272391** |
| **18261** | **Remikiren** | **POS** | **0.003926981** |
| **18262** | **N1,N5,N10-Tris-trans-p-coumaroylspermine** | **POS** | **0.003905003** |
| **18263** | **PE(14:1(9Z)/P-16:0)** | **POS** | **0.004458229** |
| **18265** | **Myricanol 5-laminaribioside** | **POS** | **0.001051328** |
| **18266** |  | **POS** | **0.026337045** |
| **18267** |  | **POS** | **0.004830752** |
| **18269** | **Malonylawobanin** | **POS** | **0.006727165** |
| **18270** |  | **POS** | **0.003029434** |
| **18272** | **6-Hydroxycyclohex-1-ene-1-carbonyl-CoA** | **POS** | **0.018458022** |
| **18274** |  | **NEG** | **0.009760625** |
| **18276** |  | **NEG** | **0.013736161** |
| **18278** |  | **NEG** | **0.010014758** |
| **18285** |  | **NEG** | **0.000851529** |
| **18286** |  | **NEG** | **0.023574591** |
| **18287** |  | **NEG** | **0.00048697** |
| **18289** |  | **NEG** | **0.035227178** |
| **18291** |  | **NEG** | **0.000148082** |
| **18293** |  | **NEG** | **0.042322141** |
| **18294** |  | **NEG** | **0.019868353** |
| **18295** |  | **NEG** | **0.011477838** |
| **18296** |  | **NEG** | **6.0226E-05** |
| **18298** |  | **NEG** | **2.53167E-05** |
| **18299** |  | **NEG** | **0.002478972** |
| **18302** |  | **NEG** | **0.00038148** |
| **18303** |  | **NEG** | **0.000849527** |
| **18304** |  | **NEG** | **0.02600796** |
| **18305** |  | **NEG** | **1.57172E-05** |
| **18306** | **Chlorquinox** | **NEG** | **0.000709894** |
| **18307** |  | **NEG** | **0.012459168** |
| **18309** |  | **NEG** | **0.035199436** |
| **18310** |  | **NEG** | **0.001973302** |
| **18313** |  | **NEG** | **0.006493934** |
| **18315** |  | **NEG** | **4.27399E-05** |
| **18316** |  | **NEG** | **0.000254065** |
| **18319** |  | **NEG** | **0.00063733** |
| **18323** |  | **NEG** | **0.007172581** |
| **18324** |  | **NEG** | **0.021873663** |
| **18325** |  | **NEG** | **0.012576268** |
| **18327** |  | **NEG** | **0.007092405** |
| **18328** | **ZATOSETRON** | **NEG** | **0.000232615** |
| **18331** | **Violacene** | **NEG** | **0.023563895** |
| **18333** |  | **NEG** | **0.017389113** |
| **18334** |  | **NEG** | **0.003175676** |
| **18335** |  | **NEG** | **0.015608571** |
| **18336** |  | **NEG** | **0.015295488** |
| **18338** |  | **NEG** | **0.000257948** |
| **18339** |  | **NEG** | **0.035295558** |
| **18340** |  | **NEG** | **0.026766497** |
| **18341** | **Tetrachlorovinphos** | **NEG** | **0.025079793** |
| **18342** |  | **NEG** | **0.011732363** |
| **18343** |  | **NEG** | **0.00029859** |
| **18344** |  | **NEG** | **9.9928E-05** |
| **18345** | **Clebopride** | **NEG** | **0.046352285** |
| **18346** |  | **NEG** | **0.011438396** |
| **18348** |  | **NEG** | **9.83765E-05** |
| **18351** |  | **NEG** | **0.00015637** |
| **18353** | **1,2,3,4,7,8-Hexachlorodibenzodioxin** | **NEG** | **0.000185245** |
| **18354** |  | **NEG** | **0.000325987** |
| **18360** |  | **NEG** | **2.50975E-05** |
| **18361** | **Eupachlorin** | **NEG** | **0.031658376** |
| **18363** | **Ziprasidone** | **NEG** | **0.000441987** |
| **18364** |  | **NEG** | **0.000117014** |
| **18365** | **Cc1cc(N=Nc2ccc(cc2)S(=O)(=O)Nc2ccccn2)c(N)c(Cl)c1O** | **NEG** | **0.000298733** |
| **18366** |  | **NEG** | **0.000756297** |
| **18368** |  | **NEG** | **0.002683283** |
| **18371** |  | **NEG** | **0.000431543** |
| **18372** |  | **NEG** | **0.000551377** |
| **18373** |  | **NEG** | **5.07039E-05** |
| **18374** | **Albaconazole** | **NEG** | **0.003087744** |
| **18375** |  | **NEG** | **0.006433894** |
| **18376** |  | **NEG** | **0.005130077** |
| **18377** | **O-Desmethyl Gefitinib** | **NEG** | **0.004131528** |
| **18378** |  | **NEG** | **0.000143996** |
| **18379** |  | **NEG** | **0.018345737** |
| **18380** |  | **NEG** | **0.000615237** |
| **18381** |  | **NEG** | **2.83532E-05** |
| **18382** |  | **NEG** | **0.003147145** |
| **18383** |  | **NEG** | **0.013827246** |
| **18386** |  | **NEG** | **0.000134855** |
| **18387** | **Propaquizafop** | **NEG** | **6.9575E-05** |
| **18389** | **Hentriacontan-16-one** | **NEG** | **0.010531702** |
| **18390** |  | **NEG** | **0.010339931** |
| **18392** |  | **NEG** | **0.007652414** |
| **18393** |  | **NEG** | **0.000535194** |
| **18394** |  | **NEG** | **0.000220866** |
| **18395** |  | **NEG** | **6.63111E-05** |
| **18396** |  | **NEG** | **0.020136295** |
| **18398** |  | **NEG** | **0.000122101** |
| **18399** |  | **NEG** | **0.001747644** |
| **18400** | **Melledonal B** | **NEG** | **0.001366367** |
| **18402** | **Pelitinib** | **NEG** | **0.00016302** |
| **18403** | **5-Hydroxymethylflucloxacillin** | **NEG** | **0.00727075** |
| **18405** |  | **NEG** | **7.07073E-05** |
| **18406** |  | **NEG** | **0.000165381** |
| **18407** | **Bofumustine** | **NEG** | **9.46749E-05** |
| **18409** |  | **NEG** | **0.000231063** |
| **18412** |  | **NEG** | **4.26291E-05** |
| **18413** |  | **NEG** | **0.001577974** |
| **18414** |  | **NEG** | **8.78945E-05** |
| **18415** | **eribaxaban** | **NEG** | **0.002159623** |
| **18417** |  | **NEG** | **0.00011053** |
| **18418** |  | **NEG** | **0.000606746** |
| **18419** | **YC 170** | **NEG** | **0.000346797** |
| **18420** |  | **NEG** | **0.003372351** |
| **18421** |  | **NEG** | **0.021364584** |
| **18422** |  | **NEG** | **0.001207281** |
| **18424** |  | **NEG** | **0.000131473** |
| **18425** |  | **NEG** | **0.039481505** |
| **18426** |  | **NEG** | **0.01795667** |
| **18429** |  | **NEG** | **5.5793E-05** |
| **18430** |  | **NEG** | **5.62517E-05** |
| **18432** |  | **NEG** | **0.023889146** |
| **18433** | **DG(14:1n5/0:0/14:1n5)** | **NEG** | **0.001774084** |
| **18437** | **Cer(d18:0/14:0)** | **NEG** | **0.025715769** |
| **18438** | **N-Nervonoyl Phenylalanine** | **NEG** | **5.1695E-05** |
| **18439** |  | **NEG** | **0.011636683** |
| **18440** | **Probucol** | **NEG** | **0.000161257** |
| **18441** |  | **NEG** | **0.000620143** |
| **18443** |  | **NEG** | **4.52748E-05** |
| **18444** | **2-Hexaprenyl-6-hydroxyphenol** | **NEG** | **0.004134187** |
| **18446** |  | **NEG** | **0.005023973** |
| **18448** |  | **NEG** | **7.1552E-05** |
| **18450** | **Tetracosyl ferulate** | **NEG** | **0.003628102** |
| **18451** |  | **NEG** | **0.000987857** |
| **18452** | **1-(11-(Dodecylamino)-10-hydroxyundecyl)-3,7-dihydro-3,7-dimethyl-1H-purine-2,6-dione** | **NEG** | **1.53581E-05** |
| **18453** | **(3b,24R,25x)-26-Benzoyloxystigmast-5-ene-3-ol** | **NEG** | **0.00018055** |
| **18455** | **Cer(d18:2(4E,14Z)/16:0)** | **NEG** | **0.002019942** |
| **18456** | **Hyperforin** | **NEG** | **0.000658389** |
| **18457** |  | **NEG** | **0.000112568** |
| **18459** | **all-trans-Neurosporene** | **NEG** | **0.005220982** |
| **18460** |  | **NEG** | **0.000676425** |
| **18461** |  | **NEG** | **0.002445333** |
| **18462** |  | **NEG** | **0.001209431** |
| **18464** |  | **NEG** | **0.004293525** |
| **18465** | **Telotristat** | **NEG** | **0.000821053** |
| **18466** | **Retinol linoleate** | **NEG** | **0.034354647** |
| **18470** | **(2S)-2-Amino-N-[(1S)-7,7-dimethyl-1-[[4-(2-methylphenyl)piperazin-1-yl]sulfonylmethyl]-2-bicyclo[2.2.1]heptanyl]-4-methylsulfonylbutanamide** | **NEG** | **0.002194551** |
| **18471** |  | **NEG** | **0.000120988** |
| **18474** |  | **NEG** | **0.005322614** |
| **18477** |  | **NEG** | **0.000784029** |
| **18478** |  | **NEG** | **0.023125906** |
| **18479** |  | **NEG** | **0.000472433** |
| **18480** | **Anhydrorhodovibrin** | **NEG** | **0.000344558** |
| **18481** | **DG(14:0/0:0/18:1n7)** | **NEG** | **0.000299672** |
| **18482** |  | **NEG** | **0.000242869** |
| **18486** | **DG(15:0/18:2(9Z,12Z)/0:0)** | **NEG** | **0.01190577** |
| **18487** |  | **NEG** | **0.00083204** |
| **18489** | **Hydroxyspirilloxanthin** | **NEG** | **0.000341393** |
| **18490** | **Bevirimat** | **NEG** | **0.000258723** |
| **18491** |  | **NEG** | **0.022581948** |
| **18492** |  | **NEG** | **0.000131839** |
| **18498** | **L-Urobilinogen** | **NEG** | **0.04790416** |
| **18499** | **Astaxanthin** | **NEG** | **3.97807E-05** |
| **18501** |  | **NEG** | **0.001035948** |
| **18502** |  | **NEG** | **0.000302355** |
| **18503** | **Janthitrem E** | **NEG** | **0.007044596** |
| **18506** |  | **NEG** | **0.003733072** |
| **18507** | **Annonisin** | **NEG** | **0.003193911** |
| **18508** |  | **NEG** | **0.005233896** |
| **18509** | **Lolitriol** | **NEG** | **0.002374646** |
| **18510** | **Spicamycin** | **NEG** | **0.000102902** |
| **18511** |  | **NEG** | **0.006721687** |
| **18512** |  | **NEG** | **0.000412777** |
| **18513** |  | **NEG** | **0.005518146** |
| **18514** | **Plactin D** | **NEG** | **0.005436615** |
| **18517** | **DG(i-14:0/20:5(7Z,9Z,11E,13E,17Z)-3OH(5,6,15)/0:0)** | **NEG** | **0.000207466** |
| **18518** |  | **NEG** | **0.000235088** |
| **18520** | **Fasciculic acid B** | **NEG** | **0.009670864** |
| **18521** | **PC(2:0/PGF1alpha)** | **NEG** | **0.000755327** |
| **18523** |  | **NEG** | **0.000437531** |
| **18524** | **Enniatin B** | **NEG** | **0.00093869** |
| **18525** | **Mosesin 4** | **NEG** | **9.14856E-05** |
| **18526** |  | **NEG** | **0.001830273** |
| **18527** | **PA(14:0/18:3(6Z,9Z,12Z))** | **NEG** | **0.004551139** |
| **18528** | **Abrusoside A** | **NEG** | **0.00015955** |
| **18529** | **Eosin** | **NEG** | **0.000817742** |
| **18530** | **Metocurine** | **NEG** | **0.00100243** |
| **18531** | **A 80987** | **NEG** | **0.000279145** |
| **18533** | **PA(15:0/18:4(6Z,9Z,12Z,15Z))** | **NEG** | **0.008919098** |
| **18534** | **PA(12:0/20:3(5Z,8Z,11Z)-O(14R,15S))** | **NEG** | **0.000165796** |
| **18535** | **9,10-Dihydroergocornine methanesulfote** | **NEG** | **0.000398264** |
| **18537** |  | **NEG** | **0.00026915** |
| **18538** |  | **NEG** | **0.000235337** |
| **18540** | **C.I. Acid Green 3** | **NEG** | **0.022668114** |
| **18541** | **Fungichromin** | **NEG** | **0.005229511** |
| **18542** |  | **NEG** | **0.000228227** |
| **18543** |  | **NEG** | **0.000639009** |
| **18545** | **Descladinose roxithromycin** | **NEG** | **0.013275485** |
| **18546** | **Temoporfin** | **NEG** | **0.003784018** |
| **18549** | **Avadharidine** | **NEG** | **0.000551144** |
| **18550** | **PA(12:0/20:5(7Z,9Z,11E,13E,17Z)-3OH(5,6,15))** | **NEG** | **0.000770989** |
| **18552** | **Elatine** | **NEG** | **0.007315141** |
| **18553** | **Cefotiam hexetil** | **NEG** | **0.002697743** |
| **18554** | **Corchorusoside A** | **NEG** | **0.004339647** |
| **18555** |  | **NEG** | **0.009929623** |
| **18556** | **norerythromycin** | **NEG** | **0.009860867** |
| **18557** |  | **NEG** | **0.004884325** |
| **18558** |  | **NEG** | **0.005791019** |
| **18559** |  | **NEG** | **7.61782E-06** |
| **18560** |  | **NEG** | **0.002782562** |
| **18561** |  | **NEG** | **0.000570111** |
| **18562** |  | **NEG** | **0.045514002** |
| **18564** | **N-Benzyladriamycin-14-valerate** | **NEG** | **0.006406247** |
| **18565** | **3-({5-[(N-Acetyl-3-{4-[(carboxycarbonyl)(2-carboxyphenyl)amino]-1-naphthyl}-L-alanyl)amino]pentyl}oxy)-2-naphthoic acid** | **NEG** | **0.000629159** |
| **18566** | **PA(8:0/LTE4)** | **NEG** | **1.20024E-05** |
| **18567** | **Azadirachtin A** | **NEG** | **0.005017988** |
| **18569** | **Fumonisin B1** | **NEG** | **0.001451007** |
| **18570** | **Kansuinine B** | **NEG** | **0.016209182** |
| **18571** |  | **NEG** | **0.003648252** |
| **18572** |  | **NEG** | **0.000308236** |
| **18573** |  | **NEG** | **0.001792834** |
| **18574** |  | **NEG** | **1.13821E-06** |
| **18575** |  | **NEG** | **0.014992469** |
| **18576** | **Hordatine A glucoside** | **NEG** | **0.012314991** |
| **18577** |  | **NEG** | **0.00524612** |
| **18578** |  | **NEG** | **0.000388098** |
| **18579** |  | **NEG** | **0.000141238** |
| **18580** |  | **NEG** | **0.008038362** |
| **18581** |  | **NEG** | **0.00050663** |
| **18583** |  | **NEG** | **0.000600635** |
| **18584** |  | **NEG** | **2.55144E-05** |
| **18585** |  | **NEG** | **0.000677989** |
| **18586** |  | **NEG** | **0.015912619** |
| **18587** |  | **NEG** | **0.000870389** |
| **18590** |  | **NEG** | **0.007950543** |
| **18593** |  | **NEG** | **0.00859681** |
| **18595** | **Phyllanthusol A** | **NEG** | **0.004458636** |
| **18596** |  | **NEG** | **0.009668931** |
| **18597** |  | **NEG** | **0.016353672** |
| **18598** |  | **NEG** | **0.0107502** |
| **18599** |  | **NEG** | **0.001582473** |
| **18600** | **5-Formyl-5,6,7,8-tetrahydromethanopterin** | **NEG** | **0.004145623** |
| **18601** |  | **NEG** | **0.01354001** |
| **18602** | **Inositol nicotinate** | **NEG** | **0.010333573** |
| **18603** |  | **NEG** | **0.006943403** |
| **18604** |  | **NEG** | **9.42199E-05** |
| **18605** |  | **NEG** | **0.00420121** |
| **18607** | **Quin-2 acetoxymethyl ester** | **NEG** | **0.009437516** |
| **18608** |  | **NEG** | **0.008581108** |
| **18609** |  | **NEG** | **0.000194166** |
| **18610** | **precorrin-1** | **NEG** | **0.000595681** |
| **18611** |  | **NEG** | **0.002757403** |
| **18612** |  | **NEG** | **0.000187898** |
| **18613** |  | **NEG** | **0.012524865** |
| **18615** |  | **NEG** | **0.002845871** |
| **18616** |  | **NEG** | **0.008703777** |
| **18617** |  | **NEG** | **0.044946968** |
| **18618** | **3-trans,5-cis-Octadienoyl-CoA** | **NEG** | **0.033211895** |
| **18619** |  | **NEG** | **0.016729709** |
| **18620** | **6-Hydroxycyclohex-1-ene-1-carbonyl-CoA** | **NEG** | **0.006306492** |
| **18622** |  | **NEG** | **0.007052793** |
| **18623** | **Theasinensin A** | **NEG** | **0.013348388** |
| **18624** |  | **NEG** | **0.00013294** |
| **18627** |  | **NEG** | **0.028969718** |
| **18628** |  | **POS** | **0.002641398** |
| **18629** | **O-Desmethyl Gefitinib** | **POS** | **0.000768895** |
| **18631** |  | **POS** | **0.002098955** |
| **18632** |  | **POS** | **0.000606219** |
| **18633** | **Monobasic calcium phosphate** | **POS** | **0.023630487** |
| **18634** |  | **POS** | **0.000455833** |
| **18635** |  | **POS** | **0.02970615** |
| **18636** |  | **POS** | **0.006548551** |
| **18637** |  | **POS** | **7.4199E-06** |
| **18640** |  | **POS** | **0.001133347** |
| **18642** |  | **POS** | **0.018758164** |
| **18643** |  | **POS** | **0.000742992** |
| **18644** | **Pelitinib** | **POS** | **0.000184319** |
| **18646** | **1,1'-(1,4-Dihydro-4-nonyl-3,5-pyridinediyl)bis[1-decanone]** | **POS** | **0.000107215** |
| **18647** |  | **POS** | **0.000185511** |
| **18648** |  | **POS** | **0.026433927** |
| **18650** | **PA(16:1(9Z)/14:1(9Z))** | **POS** | **0.01214941** |
| **18652** |  | **POS** | **0.011922813** |
| **18653** |  | **POS** | **0.008087883** |
| **18655** |  | **POS** | **0.018808835** |
| **18660** |  | **POS** | **0.00648625** |
| **18661** | **Bromoethane** | **POS** | **0.012536496** |
| **18662** | **1,3,2lambda~6~-Dioxathietane-2,2-dione** | **POS** | **0.003384075** |
| **18664** |  | **POS** | **7.27474E-05** |
| **18665** |  | **POS** | **7.65398E-05** |
| **18667** | **(2-Chlorophenyl)methyldiazene** | **POS** | **0.041211823** |
| **18668** |  | **POS** | **0.000729928** |
| **18669** |  | **POS** | **0.000948489** |
| **18670** | **Desflurane** | **POS** | **0.003523154** |
| **18671** |  | **POS** | **0.004798431** |
| **18672** | **3,6-dichlorocatechol** | **POS** | **0.001908329** |
| **18674** |  | **POS** | **0.022498044** |
| **18675** |  | **POS** | **0.002770842** |
| **18676** |  | **POS** | **2.06125E-05** |
| **18678** | **Tetranitromethane** | **POS** | **4.9369E-05** |
| **18680** |  | **POS** | **0.00663069** |
| **18681** |  | **POS** | **0.040218853** |
| **18682** |  | **POS** | **9.82201E-05** |
| **18684** |  | **POS** | **1.55358E-05** |
| **18685** |  | **POS** | **0.007652804** |
| **18686** |  | **POS** | **0.001907421** |
| **18687** | **SWEP** | **POS** | **0.001482865** |
| **18688** | **2,4-Dichlorophenoxyacetate** | **POS** | **0.002353929** |
| **18689** |  | **POS** | **0.002728593** |
| **18690** |  | **POS** | **0.005136075** |
| **18691** |  | **POS** | **0.000607925** |
| **18692** |  | **POS** | **0.00387588** |
| **18696** |  | **POS** | **0.002472425** |
| **18699** |  | **POS** | **0.001973671** |
| **18700** |  | **POS** | **0.00971614** |
| **18701** |  | **POS** | **0.009299561** |
| **18702** | **Bromoxynil** | **POS** | **0.001320836** |
| **18704** |  | **POS** | **0.001316928** |
| **18705** |  | **POS** | **0.002366889** |
| **18707** |  | **POS** | **0.010225554** |
| **18708** |  | **POS** | **0.00070237** |
| **18709** | **Acetyl chloride, (2,4-bis(1-methylbutyl)phenoxy)-** | **POS** | **0.000348395** |
| **18710** |  | **POS** | **0.002108006** |
| **18711** |  | **POS** | **0.020132591** |
| **18712** |  | **POS** | **0.039603283** |
| **18715** |  | **POS** | **0.010125696** |
| **18717** |  | **POS** | **1.48823E-05** |
| **18718** |  | **POS** | **0.007394886** |
| **18719** | **AL-294** | **POS** | **0.005362783** |
| **18720** | **Magnesium caprate** | **POS** | **0.000515304** |
| **18722** | **Clebopride** | **POS** | **0.012361675** |
| **18723** |  | **POS** | **0.009820809** |
| **18724** |  | **POS** | **0.000535266** |
| **18725** |  | **POS** | **0.017647431** |
| **18728** | **1,2,3,4,7,8-Hexachlorodibenzodioxin** | **POS** | **0.001095861** |
| **18730** |  | **POS** | **0.000552668** |
| **18731** | **Dialifor** | **POS** | **0.000105022** |
| **18733** |  | **POS** | **0.000353173** |
| **18735** | **DU-6859** | **POS** | **0.011108272** |
| **18736** |  | **POS** | **0.008216999** |
| **18737** |  | **POS** | **0.020890345** |
| **18738** |  | **POS** | **0.013249376** |
| **18739** |  | **POS** | **0.004122816** |
| **18740** |  | **POS** | **5.84086E-05** |
| **18741** |  | **POS** | **2.63895E-05** |
| **18742** |  | **POS** | **0.008257435** |
| **18743** |  | **POS** | **0.000283412** |
| **18744** |  | **POS** | **9.07944E-05** |
| **18745** |  | **POS** | **0.038699965** |
| **18746** |  | **POS** | **0.007574546** |
| **18748** | **Barbamide** | **POS** | **0.000389846** |
| **18749** |  | **POS** | **1.83772E-05** |
| **18750** |  | **POS** | **0.007317127** |
| **18752** |  | **POS** | **0.010147025** |
| **18753** |  | **POS** | **0.022135414** |
| **18754** |  | **POS** | **0.000110984** |
| **18755** |  | **POS** | **0.006353651** |
| **18756** | **Benoxaprofen glucuronide** | **POS** | **0.0001922** |
| **18758** |  | **POS** | **0.024144517** |
| **18759** |  | **POS** | **0.007095889** |
| **18761** | **tritriacontanoic acid** | **POS** | **0.01998134** |
| **18762** |  | **POS** | **0.003020409** |
| **18763** | **Thallium sulfate** | **POS** | **0.006807459** |
| **18766** |  | **POS** | **0.028941017** |
| **18768** |  | **POS** | **4.7333E-05** |
| **18769** |  | **POS** | **0.007136378** |
| **18770** |  | **POS** | **0.003038003** |
| **18771** | **N-Nervonoyl Tyrosine** | **POS** | **0.017435489** |
| **18773** | **DG(8:0/20:3(8Z,11Z,14Z)-2OH(5,6)/0:0)** | **POS** | **3.25786E-05** |
| **18774** | **DG(14:0/16:0/0:0)** | **POS** | **0.012202289** |
| **18775** |  | **POS** | **0.000934426** |
| **18776** | **Dihexadecyl hydrogen phosphate** | **POS** | **1.22206E-05** |
| **18777** | **Aliskiren** | **POS** | **0.011079846** |
| **18778** | **Nonadecylresorcinol glucuronide** | **POS** | **0.001006084** |
| **18780** | **(6-Isocyanatohexyl)carbamic acid 3beta-cholesteryl ester** | **POS** | **0.002625728** |
| **18781** |  | **POS** | **0.000496577** |
| **18782** | **3-O-beta-D-glucosyl-brassicasterol** | **POS** | **8.43638E-05** |
| **18783** | **Cholesterol glucuronide** | **POS** | **0.000955376** |
| **18784** | **3-Hexaprenyl-4,5-dihydroxybenzoate** | **POS** | **3.04822E-05** |
| **18787** | **Etiopurpurin** | **POS** | **0.000895387** |
| **18788** | **Prednisolone 21-all-cis-farnesylate** | **POS** | **0.000571195** |
| **18790** |  | **POS** | **0.011582546** |
| **18791** |  | **POS** | **0.001861932** |
| **18792** |  | **POS** | **0.000174151** |
| **18793** | **Leukotriene C5** | **POS** | **6.11912E-05** |
| **18794** |  | **POS** | **0.000653554** |
| **18795** | **Lopivir** | **POS** | **5.17242E-05** |
| **18796** |  | **POS** | **7.39601E-05** |
| **18797** | **PE(14:1(9Z)/14:1(9Z))** | **POS** | **0.000398266** |
| **18798** | **Calafatimine** | **POS** | **0.000673271** |
| **18800** | **Protorifamycin I** | **POS** | **7.35574E-05** |
| **18801** |  | **POS** | **0.000605536** |
| **18802** | **DPDPE** | **POS** | **3.4297E-05** |
| **18803** |  | **POS** | **3.54E-05** |
| **18804** | **Nummularine A** | **POS** | **9.8786E-05** |
| **18805** | **DG(15:0/PGE2/0:0)** | **POS** | **0.000575431** |
| **18806** | **Globomycin** | **POS** | **0.049747617** |
| **18807** | **1-Palmitoyl-2-(5-keto-6-octendioyl)-sn-glycero-3-phosphatidylcholine** | **POS** | **7.35013E-05** |
| **18808** |  | **POS** | **0.004024401** |
| **18810** | **Pisumoside B** | **POS** | **0.007925708** |
| **18811** |  | **POS** | **0.006644251** |
| **18812** |  | **POS** | **0.006114359** |
| **18813** |  | **POS** | **0.005014152** |
| **18814** |  | **POS** | **0.007929767** |
| **18815** | **Nudicauline** | **POS** | **0.007737062** |
| **18816** |  | **POS** | **0.00160657** |
| **18817** | **Guinea green B** | **POS** | **0.005474489** |
| **18818** |  | **POS** | **0.000466971** |
| **18819** | **Cheirotoxol** | **POS** | **0.004804195** |
| **18820** |  | **POS** | **0.000140544** |
| **18822** | **Aquifoliunine EII** | **POS** | **0.010382867** |
| **18823** |  | **POS** | **0.000450719** |
| **18824** |  | **POS** | **1.66261E-06** |
| **18825** |  | **POS** | **6.68899E-05** |
| **18827** |  | **POS** | **6.57379E-05** |
| **18828** |  | **POS** | **0.005845461** |
| **18829** |  | **POS** | **0.018936387** |
| **18830** | **Arctignan D** | **POS** | **2.66533E-06** |
| **18832** | **Methanofuran** | **POS** | **5.46702E-05** |
| **18833** |  | **POS** | **0.00867922** |
| **18834** |  | **POS** | **0.015542639** |
| **18835** | **5-Methyl-5,6,7,8-tetrahydromethanopterin** | **POS** | **0.000242908** |
| **18836** |  | **POS** | **0.001298415** |
| **18837** |  | **POS** | **2.83196E-05** |
| **18838** |  | **POS** | **0.00287519** |
| **18839** |  | **POS** | **2.89507E-05** |
| **18840** |  | **POS** | **7.35995E-06** |
| **18841** |  | **POS** | **3.22307E-05** |
| **18842** | **Spinosin A** | **POS** | **0.011383751** |
| **18843** |  | **POS** | **0.004553476** |
| **18844** |  | **POS** | **0.006162726** |
| **18846** | **Alatanin 2** | **POS** | **0.002094715** |
| **18847** |  | **POS** | **0.004649696** |
| **18848** |  | **POS** | **0.007049191** |
| **18849** |  | **POS** | **0.003092852** |
| **18850** | **Iresinin I** | **POS** | **0.006457281** |
| **18851** | **Cyclohex-1-ene-1-carboxyl-CoA** | **POS** | **0.020493162** |
| **18852** | **BCECF-acetoxymethyl** | **POS** | **0.009050143** |
| **18853** |  | **POS** | **0.003710936** |
| **18854** |  | **POS** | **0.010486735** |
| **18855** | **Chlorhexidine glucote** | **POS** | **0.002960878** |
| **18856** |  | **POS** | **0.002469779** |
| **18857** | **4-phenylbutanoyl-CoA** | **POS** | **2.00141E-05** |
| **18858** |  | **POS** | **0.001835237** |
| **18859** |  | **POS** | **0.013171079** |
| **18860** | **[(2R,3S,4S,5R)-2,4-Disulfooxy-5-(sulfooxymethyl)-5-[(2S,3R,4S,5R,6R)-3,4,5-trisulfooxy-6-(sulfooxymethyl)oxan-2-yl]oxyoxolan-3-yl] hydrogen sulfate** | **POS** | **0.008395055** |
| **18862** | **bismuth sucrose octasulfate** | **POS** | **0.003632893** |
| **18863** | **TG(22:0/22:2(13Z,16Z)/O-18:0)** | **POS** | **0.004288158** |
| **18864** |  | **POS** | **0.012341244** |
| **18865** | **TG(20:0/22:1(13Z)/20:0)** | **POS** | **0.026384182** |
| **18867** |  | **NEG** | **0.003407479** |
| **18868** |  | **NEG** | **0.037162402** |
| **18869** |  | **NEG** | **0.005646649** |
| **18870** |  | **NEG** | **0.000736473** |
| **18875** |  | **NEG** | **6.92842E-06** |
| **18878** |  | **NEG** | **0.001216844** |
| **18879** |  | **NEG** | **0.010891313** |
| **18880** |  | **NEG** | **0.009485548** |
| **18882** |  | **NEG** | **0.011244932** |
| **18885** |  | **NEG** | **0.010190001** |
| **18888** |  | **NEG** | **0.005815711** |
| **18889** |  | **NEG** | **0.003957828** |
| **18895** |  | **NEG** | **0.000309763** |
| **18896** | **Mosesin 4** | **NEG** | **0.000120564** |
| **18897** |  | **NEG** | **0.03959769** |
| **18898** |  | **NEG** | **0.011721991** |
| **18899** |  | **NEG** | **0.000212695** |
| **18900** |  | **POS** | **0.025379397** |
| **18901** |  | **POS** | **6.87597E-05** |
| **18902** | **Lanthanum** | **POS** | **0.000351871** |
| **18903** | **Praseodymium** | **POS** | **0.001668474** |
| **18905** | **Arsenobetaine** | **POS** | **0.000152604** |
| **18906** | **Fluoromethyl 2,2-difluoro-1-(trifluoromethyl)vinyl ether** | **POS** | **0.032561051** |
| **18908** |  | **POS** | **0.006880002** |
| **18910** |  | **POS** | **0.007662284** |
| **18911** |  | **POS** | **0.007358551** |
| **18912** | **4-(2-Hydroxy-3-(tert-butylamino)propoxy)-3-iodo-1H-indole-2-carbonitrile** | **POS** | **0.019315753** |
| **18913** | **Cligosiban** | **POS** | **0.003545968** |
| **18914** |  | **POS** | **0.000331468** |
| **18916** |  | **POS** | **0.011654924** |
| **18917** | **Halometasone** | **POS** | **0.001673227** |
| **18918** | **Clindamycin phosphate** | **POS** | **7.3964E-05** |
| **18919** |  | **POS** | **0.004942411** |
| **18920** |  | **POS** | **5.41806E-05** |
| **18921** |  | **POS** | **0.000366045** |
| **18923** | **13-Methyl-7-[9-(4,4,5,5,5-pentafluoropentylsulfinyl)nonyl]-6,7,8,9,11,12,14,15,16,17-decahydrocyclopenta[a]phenanthrene-3,17-diol** | **POS** | **0.005225922** |
| **18924** |  | **POS** | **3.21092E-05** |
| **18926** |  | **POS** | **0.000820361** |
| **18927** | **Aypgkf** | **POS** | **0.001039892** |
| **18929** |  | **POS** | **0.001762261** |
| **18930** | **Atractyloside H** | **POS** | **0.007591226** |
| **18933** |  | **POS** | **0.030312242** |
| **18935** |  | **POS** | **0.00626153** |
| **18936** |  | **POS** | **0.031159549** |
| **18937** |  | **POS** | **0.008952782** |
| **18938** |  | **POS** | **0.014220577** |
| **18940** |  | **POS** | **0.001736157** |
| **18942** | **Heptacarboxylporphyrin III** | **POS** | **0.007756861** |
| **18943** |  | **POS** | **0.030918016** |
| **18944** | **Malvidin 3-sophoroside 5-glucoside** | **POS** | **0.040530842** |
| **18945** |  | **POS** | **0.006940229** |
| **18946** |  | **POS** | **0.039851552** |
| **18947** |  | **POS** | **0.000422244** |
| **18948** |  | **POS** | **0.016159468** |
| **18949** | **(2E,8E)-10-hydroxydeca-2,8-dien-4-ynoyl-CoA** | **POS** | **0.000967504** |
| **18951** | **2-Succinylbenzoyl-CoA** | **POS** | **0.009034161** |
| **18952** |  | **POS** | **0.007078292** |
| **18954** | **TG(22:0/22:2(13Z,16Z)/O-18:0)** | **POS** | **0.004603358** |
| **18957** |  | **POS** | **0.000212547** |
| **18961** |  | **POS** | **5.15307E-05** |
| **18962** |  | **POS** | **0.00377593** |
| **18964** |  | **POS** | **0.02227045** |
| **18966** |  | **NEG** | **0.013090508** |
| **18968** |  | **NEG** | **0.001052658** |
| **18971** | **Azacozole** | **POS** | **0.010002736** |
| **18972** |  | **POS** | **4.79666E-05** |
| **18973** |  | **POS** | **0.01250179** |
| **18975** |  | **POS** | **0.000365761** |
| **18976** | **Epoxymurin-A** | **POS** | **0.048732707** |
| **18977** | **Tetrabromobisphenol A** | **POS** | **2.0649E-05** |
| **18978** |  | **POS** | **0.005596059** |
| **18979** |  | **POS** | **0.001320778** |
| **18980** |  | **POS** | **0.010790391** |
| **18981** | **DG(13:0/20:4(6Z,8E,10E,14Z)-2OH(5S,12R)/0:0)** | **POS** | **0.018111765** |
| **18982** |  | **POS** | **0.000405871** |
| **18983** | **PA(10:0/20:4(6Z,8E,10E,14Z)-2OH(5S,12R))** | **POS** | **0.000416186** |
| **18984** | **Riboflavine 2',3',4',5'-tetrabutanoate** | **POS** | **0.004825595** |
| **18987** |  | **POS** | **0.0084115** |
| **18988** |  | **POS** | **0.011669809** |
| **18989** | **6-Hydroxycyclohex-1-ene-1-carbonyl-CoA** | **POS** | **0.018194788** |
| **18992** |  | **NEG** | **0.012821678** |
| **18993** |  | **NEG** | **0.000190138** |
| **18994** |  | **NEG** | **0.000147257** |
| **18995** | **2-Bromoacetaldehyde** | **NEG** | **0.000132333** |
| **18998** |  | **NEG** | **0.00589081** |
| **19000** |  | **NEG** | **0.000122743** |
| **19001** |  | **NEG** | **0.000113461** |
| **19003** |  | **NEG** | **0.003499092** |
| **19004** |  | **NEG** | **0.020779574** |
| **19005** |  | **NEG** | **0.049115918** |
| **19008** |  | **NEG** | **5.19618E-06** |
| **19009** |  | **NEG** | **9.29426E-07** |
| **19010** |  | **NEG** | **0.008172517** |
| **19011** |  | **NEG** | **8.92465E-05** |
| **19013** |  | **NEG** | **5.518E-05** |
| **19015** | **SWEP** | **NEG** | **5.07016E-05** |
| **19017** |  | **NEG** | **3.99448E-05** |
| **19018** |  | **NEG** | **0.001719571** |
| **19019** |  | **NEG** | **0.008920715** |
| **19021** |  | **NEG** | **0.004854065** |
| **19022** |  | **NEG** | **0.003167911** |
| **19023** |  | **NEG** | **0.000848879** |
| **19024** |  | **NEG** | **4.07513E-05** |
| **19025** |  | **NEG** | **0.00018398** |
| **19026** |  | **NEG** | **0.029606771** |
| **19027** |  | **NEG** | **0.000514959** |
| **19028** |  | **NEG** | **0.013127692** |
| **19029** |  | **NEG** | **9.12244E-05** |
| **19030** |  | **NEG** | **8.07113E-05** |
| **19033** |  | **NEG** | **0.006089646** |
| **19034** |  | **NEG** | **0.00044547** |
| **19037** |  | **NEG** | **0.001374071** |
| **19042** |  | **NEG** | **0.004989869** |
| **19043** |  | **NEG** | **3.98553E-05** |
| **19044** |  | **NEG** | **0.000784652** |
| **19045** |  | **NEG** | **0.002192362** |
| **19046** |  | **NEG** | **0.002098051** |
| **19047** |  | **NEG** | **0.008342073** |
| **19048** |  | **NEG** | **0.000689704** |
| **19049** | **2-Oxoclopidogrel** | **NEG** | **3.2201E-05** |
| **19050** |  | **NEG** | **0.00019502** |
| **19051** |  | **NEG** | **0.000461291** |
| **19052** |  | **NEG** | **8.20533E-05** |
| **19054** | **Eliprodil** | **NEG** | **0.001545182** |
| **19055** |  | **NEG** | **1.913E-05** |
| **19056** |  | **NEG** | **0.012331062** |
| **19057** |  | **NEG** | **6.77158E-05** |
| **19058** | **8-Chloro-10-[3-(dimethylamino)propyl]phenothiazine-2,3-diol** | **NEG** | **0.00031614** |
| **19062** | **4-[[5-Chloro-4-(2,4,6-trimethylanilino)pyrimidin-2-yl]amino]benzonitrile** | **NEG** | **0.000348225** |
| **19064** | **Atovaquone** | **NEG** | **0.000604697** |
| **19066** | **Spiro[benzofuran-2(3H),1'-[2]cyclohexene]-7-chloro-4,6-dimethoxy-6'-methyl-2'-(methylthio)-3,4'-dione** | **NEG** | **0.018842459** |
| **19067** |  | **NEG** | **0.000650378** |
| **19068** |  | **NEG** | **0.028989448** |
| **19069** |  | **NEG** | **2.2501E-05** |
| **19072** |  | **NEG** | **0.001943808** |
| **19073** |  | **NEG** | **0.014304433** |
| **19074** | **Tepoxalin** | **NEG** | **0.007356418** |
| **19075** |  | **NEG** | **0.010207424** |
| **19077** | **Cetirizine** | **NEG** | **0.000198498** |
| **19079** |  | **NEG** | **0.000555088** |
| **19080** |  | **NEG** | **3.59962E-05** |
| **19082** |  | **NEG** | **0.000193933** |
| **19083** |  | **NEG** | **0.000313868** |
| **19084** |  | **NEG** | **0.00110132** |
| **19085** |  | **NEG** | **0.001462013** |
| **19086** | **2-(4-Chloro-3,5-dimethylphenoxy)-N-(2-phenyl-2H-benzotriazol-5-yl)-acetamide** | **NEG** | **0.001784779** |
| **19094** | **1-(2-Chloro-4-(6,7-dimethoxyquinazolin-4-yloxy)phenyl)-3-propylurea** | **NEG** | **3.38937E-06** |
| **19095** |  | **NEG** | **0.00091906** |
| **19096** |  | **NEG** | **0.006276725** |
| **19097** |  | **NEG** | **0.000771243** |
| **19099** |  | **NEG** | **0.000233167** |
| **19102** |  | **NEG** | **0.036271172** |
| **19103** |  | **NEG** | **7.78236E-05** |
| **19104** |  | **NEG** | **0.025236627** |
| **19105** |  | **NEG** | **9.2355E-05** |
| **19106** |  | **NEG** | **0.001760591** |
| **19107** |  | **NEG** | **8.56465E-05** |
| **19108** |  | **NEG** | **0.000208036** |
| **19110** | **Longamide** | **NEG** | **0.000424342** |
| **19111** |  | **NEG** | **0.000158352** |
| **19112** | **(S)-(+)-Tert-Butyl 2-(4-(4-chlorophenyl)-2,3,9-trimethyl-6H-thieno[3,2-f][1,2,4]triazolo[4,3-a][1,4]diazepin-6-yl)acetate** | **NEG** | **0.000403101** |
| **19113** | **Barbamide** | **NEG** | **0.049614342** |
| **19115** | **6-O-Methylarmillaridin** | **NEG** | **0.000438044** |
| **19116** | **14,16-Hentriacontanedione** | **NEG** | **0.003983505** |
| **19117** | **14,16-Hentriacontanedione** | **NEG** | **0.002430808** |
| **19118** |  | **NEG** | **0.00014188** |
| **19119** | **Cer(d18:0/12:0)** | **NEG** | **0.000631215** |
| **19120** |  | **NEG** | **0.000851595** |
| **19121** |  | **NEG** | **0.000917521** |
| **19122** |  | **NEG** | **0.00474229** |
| **19123** |  | **NEG** | **0.000525895** |
| **19124** | **Diazeniumdiolate** | **NEG** | **0.008481866** |
| **19126** | **Tridodecylamine** | **NEG** | **0.02008786** |
| **19128** |  | **NEG** | **0.000115252** |
| **19131** |  | **NEG** | **0.002786073** |
| **19135** | **L-Urobilin** | **NEG** | **0.001868747** |
| **19136** |  | **NEG** | **0.000149622** |
| **19137** | **Carboxypeptidase B** | **NEG** | **0.01575775** |
| **19138** |  | **NEG** | **0.014731681** |
| **19139** | **Kuwanol E** | **NEG** | **0.007806779** |
| **19142** | **Jesaconitine** | **NEG** | **0.004617734** |
| **19143** |  | **NEG** | **0.007352209** |
| **19144** | **Chalcomycin** | **NEG** | **0.00480335** |
| **19145** | **Guinea green B** | **NEG** | **0.015350058** |
| **19146** | **2-trans,4-trans-Octadienoyl-CoA** | **NEG** | **0.038853184** |
| **19147** |  | **POS** | **0.012424509** |
| **19148** |  | **POS** | **0.002826994** |
| **19151** |  | **POS** | **0.035694825** |
| **19153** |  | **POS** | **0.046934499** |
| **19155** |  | **POS** | **0.000111396** |
| **19158** | **Phyllanthusol A** | **POS** | **0.017536103** |
| **19160** |  | **POS** | **0.001859296** |
| **19163** |  | **POS** | **0.001559167** |
| **19166** |  | **POS** | **0.000235069** |
| **19173** |  | **NEG** | **0.00290344** |
| **19174** |  | **NEG** | **5.20249E-05** |
| **19175** |  | **NEG** | **0.019289918** |
| **19176** |  | **NEG** | **0.015472946** |
| **19180** | **Propanoyl phosphate** | **POS** | **5.81456E-05** |
| **19181** | **2,4-Dichloro-6-nitrophenol** | **POS** | **0.02630566** |
| **19184** | **Cloranolol** | **POS** | **0.000659587** |
| **19185** |  | **POS** | **0.001423494** |
| **19187** |  | **POS** | **0.007529014** |
| **19189** | **20,21-Diprenylterpendole I** | **POS** | **0.025993623** |
| **19191** |  | **POS** | **0.008722837** |
| **19192** |  | **POS** | **0.019698716** |
| **19194** | **Hexafluoroacetone** | **POS** | **0.000284764** |
| **19197** |  | **POS** | **0.008075586** |
| **19198** |  | **POS** | **0.021801994** |
| **19201** |  | **POS** | **0.003250502** |
| **19202** |  | **POS** | **0.029459026** |
| **19203** | **Iron(III) citrate** | **POS** | **0.011535298** |
| **19204** |  | **POS** | **0.000222333** |
| **19205** |  | **POS** | **4.88372E-05** |
| **19207** |  | **POS** | **9.13652E-05** |
| **19208** |  | **POS** | **1.38024E-05** |
| **19209** |  | **POS** | **0.041175969** |
| **19211** | **(2S)-dihydrotricetin** | **POS** | **0.00229321** |
| **19212** |  | **POS** | **0.00266932** |
| **19216** |  | **POS** | **0.011201228** |
| **19217** |  | **POS** | **0.008396933** |
| **19222** |  | **POS** | **0.000371536** |
| **19223** |  | **POS** | **0.00611099** |
| **19224** |  | **POS** | **0.002135271** |
| **19225** |  | **POS** | **9.11897E-06** |
| **19226** |  | **POS** | **6.16231E-05** |
| **19227** | **Azimilide** | **POS** | **0.04313345** |
| **19228** |  | **POS** | **0.016821479** |
| **19229** |  | **POS** | **0.005283485** |
| **19231** | **4-(7-(((1R)-1-((3-Chloro-2-thienyl)methyl)propyl)amino)-3H-imidazo(4,5-b)pyridin-3-yl)-N-ethyl-2,3-dihydroxycyclopentanecarboxamide, (1S,2R,3S,4R)-** | **POS** | **0.002803751** |
| **19233** |  | **POS** | **0.000263501** |
| **19234** |  | **POS** | **4.3944E-05** |
| **19235** |  | **POS** | **0.001218907** |
| **19236** | **all-trans-Neurosporene** | **POS** | **0.000238196** |
| **19237** |  | **POS** | **7.64032E-05** |
| **19239** | **[2-(Octadecoxymethyl)oxolan-2-yl]methyl 2-(trimethylazaniumyl)ethyl phosphate** | **POS** | **0.004828947** |
| **19242** | **Astaxanthin** | **POS** | **0.002204759** |
| **19244** |  | **POS** | **0.000108527** |
| **19246** | **PA(13:0/18:2(10E,12Z)+=O(9))** | **POS** | **0.004100601** |
| **19247** |  | **POS** | **0.004823844** |
| **19249** |  | **POS** | **0.00128065** |
| **19250** |  | **POS** | **0.016315721** |
| **19251** |  | **POS** | **0.001314249** |
| **19252** | **Jubanine A** | **POS** | **0.009627272** |
| **19253** | **Posaconazole** | **POS** | **0.001784202** |
| **19254** |  | **POS** | **0.003457781** |
| **19255** | **3-({5-[(N-Acetyl-3-{4-[(carboxycarbonyl)(2-carboxyphenyl)amino]-1-naphthyl}-L-alanyl)amino]pentyl}oxy)-2-naphthoic acid** | **POS** | **6.51308E-05** |
| **19256** |  | **POS** | **0.016795997** |
| **19257** |  | **POS** | **0.005927472** |
| **19258** |  | **POS** | **0.005651395** |
| **19259** |  | **POS** | **9.66303E-06** |
| **19260** |  | **POS** | **0.024638632** |
| **19261** | **5-Formyl-5,6,7,8-tetrahydromethanopterin** | **POS** | **0.006872999** |
| **19262** |  | **POS** | **0.004725831** |
| **19263** |  | **POS** | **0.009901902** |
| **19264** | **2-trans,4-trans-Octadienoyl-CoA** | **POS** | **0.000416462** |
| **19265** | **3-Phenylpropanoyl-CoA** | **POS** | **0.004534197** |
| **19266** |  | **POS** | **0.01686924** |
| **19268** |  | **POS** | **0.021019528** |
| **19269** | **E-Phenylitaconyl-CoA** | **POS** | **0.041580655** |
| **19271** |  | **NEG** | **0.004621563** |
| **19272** |  | **POS** | **2.95214E-05** |
| **19273** |  | **POS** | **0.007355664** |
| **19276** |  | **POS** | **2.97572E-06** |
| **19277** |  | **POS** | **0.006729831** |
| **19280** |  | **POS** | **0.000502021** |
| **19281** |  | **POS** | **0.00296908** |
| **19282** |  | **POS** | **0.002586097** |
| **19283** |  | **POS** | **0.021015887** |
| **19284** |  | **POS** | **0.000455202** |
| **19287** |  | **POS** | **0.006413362** |
| **19289** |  | **POS** | **0.009165353** |
| **19290** |  | **POS** | **9.55555E-06** |
| **19293** |  | **POS** | **3.40873E-05** |
| **19295** | **4-Chloromethandienone** | **POS** | **0.002609065** |
| **19296** |  | **POS** | **0.002833513** |
| **19298** |  | **POS** | **1.7826E-05** |
| **19299** | **Pancopride** | **POS** | **0.000123069** |
| **19301** | **Tos-Phe-CH2Cl** | **POS** | **0.000587996** |
| **19302** |  | **POS** | **1.81787E-05** |
| **19303** |  | **POS** | **0.000522213** |
| **19304** | **Norprochlorperazine** | **POS** | **0.034456993** |
| **19305** | **4-[[5-Chloro-4-(2,4,6-trimethylanilino)pyrimidin-2-yl]amino]benzonitrile** | **POS** | **0.001328054** |
| **19308** |  | **POS** | **0.000582387** |
| **19309** |  | **POS** | **0.000443895** |
| **19310** |  | **POS** | **0.00029987** |
| **19311** |  | **POS** | **0.002848777** |
| **19312** |  | **POS** | **3.65819E-06** |
| **19314** |  | **POS** | **0.001276957** |
| **19315** |  | **POS** | **0.00166431** |
| **19316** |  | **POS** | **0.009784434** |
| **19317** |  | **POS** | **0.044575804** |
| **19318** | **Pradefovir** | **POS** | **0.001639516** |
| **19319** |  | **POS** | **0.002859052** |
| **19320** |  | **POS** | **0.005373891** |
| **19322** |  | **POS** | **0.003788043** |
| **19323** |  | **POS** | **0.014595315** |
| **19324** |  | **POS** | **0.000158505** |
| **19325** | **Hentriacontan-16-one** | **POS** | **3.72079E-05** |
| **19326** |  | **POS** | **0.000660878** |
| **19327** | **6-Oxocamphor** | **POS** | **0.004876315** |
| **19329** | **24-Methyl-24-methoxycycloartanol** | **POS** | **0.007653083** |
| **19330** |  | **POS** | **0.000562067** |
| **19331** |  | **POS** | **0.008134359** |
| **19332** | **(14Z)-Tricos-14-enoylcarnitine** | **POS** | **0.004873016** |
| **19333** |  | **POS** | **0.000176335** |
| **19334** | **Butter acids** | **POS** | **0.00361793** |
| **19335** |  | **POS** | **0.001624812** |
| **19336** |  | **POS** | **0.000468222** |
| **19337** | **Clomocycline** | **POS** | **0.003871513** |
| **19338** | **Didodecyl thiobispropanoate** | **POS** | **9.38432E-05** |
| **19339** |  | **POS** | **0.004252738** |
| **19340** |  | **POS** | **1.2677E-06** |
| **19341** |  | **POS** | **0.048789161** |
| **19342** |  | **POS** | **0.00036262** |
| **19343** | **1-(11-(Dodecylamino)-10-hydroxyundecyl)-3,7-dihydro-3,7-dimethyl-1H-purine-2,6-dione** | **POS** | **6.55953E-05** |
| **19344** | **dl-alpha-Tocopherol nicotite** | **POS** | **0.007463986** |
| **19345** |  | **POS** | **0.010343885** |
| **19347** | **Pateamine** | **POS** | **0.035332231** |
| **19349** |  | **POS** | **0.001172495** |
| **19350** |  | **POS** | **0.002395562** |
| **19351** | **22-Angeloylbarringtogenol C** | **POS** | **0.03052991** |
| **19352** | **LysoPC(22:1(13Z)/0:0)** | **POS** | **0.007859689** |
| **19353** | **Convallasaponin A** | **POS** | **0.004054952** |
| **19354** | **Chromoionophore I** | **POS** | **0.002691393** |
| **19355** |  | **POS** | **0.007801377** |
| **19356** | **PM-toxin B** | **POS** | **0.025074101** |
| **19357** | **Povpc** | **POS** | **0.026633736** |
| **19358** | **Cer(d17:1/5-iso PGF2VI)** | **POS** | **0.006791168** |
| **19359** | **13-Deoxytedanolide** | **POS** | **0.010578382** |
| **19360** | **Salannin** | **POS** | **0.006471574** |
| **19361** |  | **POS** | **0.002242023** |
| **19362** | **Lolitrem K** | **POS** | **0.000140757** |
| **19363** |  | **POS** | **7.51156E-05** |
| **19364** |  | **POS** | **2.78431E-05** |
| **19365** | **DG(12:0/PGF2alpha/0:0)** | **POS** | **0.003966832** |
| **19366** | **C-Toxiferine I** | **POS** | **0.001666845** |
| **19368** | **Lolicine B** | **POS** | **0.048168588** |
| **19369** | **Z-Ile-Glu(O-t-butyl)-Ala-Leucinal** | **POS** | **3.9113E-05** |
| **19371** |  | **POS** | **0.000188687** |
| **19373** |  | **POS** | **9.757E-05** |
| **19375** |  | **POS** | **0.005412898** |
| **19376** |  | **POS** | **0.027887762** |
| **19377** |  | **POS** | **0.000286538** |
| **19378** | **Myrtucommulone A** | **POS** | **0.000323746** |
| **19379** | **Kuwanon J** | **POS** | **0.008144367** |
| **19380** | **Descladinose roxithromycin** | **POS** | **0.006944419** |
| **19381** |  | **POS** | **0.007487912** |
| **19382** |  | **POS** | **0.016733863** |
| **19383** |  | **POS** | **0.002527351** |
| **19384** |  | **POS** | **0.00151699** |
| **19385** | **Bismahanine** | **POS** | **0.000787768** |
| **19386** | **Hexapeptide analogue** | **POS** | **0.001506921** |
| **19387** |  | **POS** | **8.04682E-05** |
| **19388** |  | **POS** | **6.35749E-06** |
| **19389** |  | **POS** | **0.032415733** |
| **19390** |  | **POS** | **0.00048766** |
| **19391** |  | **POS** | **0.048235423** |
| **19392** | **Methanofuran** | **POS** | **0.033334741** |
| **19393** |  | **POS** | **0.003933469** |
| **19394** |  | **POS** | **0.023785454** |
| **19395** |  | **POS** | **0.021073079** |
| **19396** |  | **POS** | **0.002422193** |
| **19397** | **Bapta-AM** | **POS** | **0.011916591** |
| **19398** |  | **POS** | **0.002023684** |
| **19401** |  | **POS** | **0.002493035** |
| **19402** |  | **POS** | **0.001626787** |
| **19403** |  | **POS** | **0.012480241** |
| **19405** |  | **POS** | **0.018715729** |
| **19406** |  | **POS** | **0.000719105** |
| **19408** |  | **POS** | **0.007687032** |
| **19409** |  | **POS** | **0.030397048** |
| **19410** |  | **POS** | **0.000463212** |
| **19411** |  | **POS** | **0.016528111** |
| **19414** |  | **POS** | **0.010191119** |
| **19415** |  | **POS** | **0.004684915** |
| **19416** |  | **NEG** | **0.002201585** |
| **19417** |  | **NEG** | **0.003996725** |
| **19418** |  | **NEG** | **0.04355716** |
| **19420** | **11beta-Chloromethylestradiol** | **NEG** | **2.99701E-05** |
| **19423** |  | **NEG** | **0.000405474** |
| **19424** |  | **NEG** | **0.01132187** |
| **19425** |  | **NEG** | **0.001940044** |
| **19428** |  | **POS** | **0.00012633** |
| **19430** |  | **POS** | **0.01949884** |
| **19431** |  | **POS** | **4.42694E-05** |
| **19432** |  | **NEG** | **0.004110251** |
| **19433** |  | **NEG** | **0.003285389** |
| **19438** | **Clindamycin phosphate** | **NEG** | **4.88592E-05** |
| **19439** |  | **POS** | **0.037248737** |
| **19440** |  | **POS** | **0.021600925** |
| **19441** |  | **POS** | **8.16754E-05** |
| **19442** |  | **POS** | **5.93921E-06** |
| **19443** |  | **NEG** | **0.022576299** |
| **19446** |  | **NEG** | **0.000853378** |
| **19447** |  | **NEG** | **0.000122809** |
| **19448** |  | **NEG** | **0.004136791** |
| **19450** | **Perphenazine sulfoxide** | **NEG** | **0.000515087** |
| **19452** |  | **POS** | **0.001139449** |
| **19455** |  | **POS** | **0.003603316** |
| **19456** | **Alilusem** | **POS** | **0.002167387** |
| **19457** |  | **POS** | **0.003771829** |
| **19458** |  | **POS** | **0.000460433** |
| **19460** |  | **POS** | **0.010608424** |
| **19461** | **BQ 123** | **POS** | **0.046148806** |
| **19463** | **Coproporphyrinogen III** | **POS** | **0.014336446** |
| **19465** |  | **POS** | **0.033452316** |
| **19466** | **Sesaminol 2-O-triglucoside** | **POS** | **0.012766619** |
| **19467** |  | **NEG** | **0.000499434** |
| **19468** |  | **NEG** | **0.000557309** |
| **19469** |  | **NEG** | **0.030911396** |
| **19472** |  | **NEG** | **0.029430155** |
| **19473** | **Dihydroxyfumarate** | **NEG** | **0.001091457** |
| **19474** |  | **NEG** | **0.037098962** |
| **19476** | **2,4-Dichlorophenol** | **NEG** | **0.000300716** |
| **19477** |  | **NEG** | **1.44387E-05** |
| **19478** |  | **NEG** | **0.009667357** |
| **19480** |  | **NEG** | **0.016789954** |
| **19482** |  | **NEG** | **0.000158293** |
| **19484** |  | **NEG** | **0.000336445** |
| **19486** | **2,5-Dichloro-4-oxohex-2-enedioate** | **NEG** | **0.000286289** |
| **19487** | **Chlorquinaldol** | **NEG** | **0.003542636** |
| **19488** |  | **NEG** | **0.000119929** |
| **19489** |  | **NEG** | **6.92507E-05** |
| **19490** |  | **NEG** | **0.021469286** |
| **19491** |  | **NEG** | **0.004528347** |
| **19492** |  | **NEG** | **0.000714299** |
| **19494** |  | **NEG** | **0.032415881** |
| **19496** |  | **NEG** | **5.45244E-05** |
| **19497** |  | **NEG** | **0.004576924** |
| **19498** | **Panaxydol chlorohydrin** | **NEG** | **0.000369354** |
| **19499** |  | **NEG** | **0.015697478** |
| **19501** | **Chlorthal** | **NEG** | **0.003826973** |
| **19502** |  | **NEG** | **0.004386223** |
| **19505** |  | **NEG** | **0.006614585** |
| **19506** |  | **NEG** | **0.017450196** |
| **19507** |  | **NEG** | **0.038733683** |
| **19509** |  | **NEG** | **0.00063662** |
| **19510** |  | **NEG** | **0.002721481** |
| **19511** |  | **NEG** | **9.89841E-05** |
| **19513** |  | **NEG** | **0.000267959** |
| **19517** |  | **NEG** | **0.00034899** |
| **19518** |  | **NEG** | **3.10764E-05** |
| **19519** |  | **NEG** | **0.000165238** |
| **19520** | **(2S)-2-Amino-3-[4-[(2S)-2-amino-3-(4-hydroxyphenyl)propanoyl]oxy-3-chlorophenyl]propanoic acid** | **NEG** | **0.004122364** |
| **19521** |  | **NEG** | **0.000442189** |
| **19528** |  | **NEG** | **0.001122374** |
| **19531** |  | **NEG** | **0.000793411** |
| **19533** | **4H-Pyrido(4',3':4,5)thieno(3,2-f)(1,2,4)triazolo(4,3-a)(1,4)diazepine, 7,8,9,10-tetrahydro-6-(2-chlorophenyl)-9-(cyclopropylcarbonyl)-1,4-dimethyl-, (S)-** | **NEG** | **0.000787067** |
| **19534** |  | **NEG** | **0.000771938** |
| **19535** |  | **NEG** | **0.009311317** |
| **19537** |  | **NEG** | **0.035019259** |
| **19538** |  | **POS** | **0.01339615** |
| **19539** | **2,5-Dichloro-carboxymethylenebut-2-en-4-olide** | **POS** | **0.012382083** |
| **19541** |  | **POS** | **0.026562862** |
| **19542** |  | **POS** | **0.039030856** |
| **19544** |  | **POS** | **0.001701557** |
| **19545** |  | **POS** | **0.001894482** |
| **19546** |  | **POS** | **0.001109195** |
| **19548** | **Debenzoylzucchini factor B** | **POS** | **0.000621509** |
| **19552** |  | **POS** | **0.003707131** |
| **19554** |  | **POS** | **0.003627272** |
| **19556** |  | **POS** | **0.000781814** |
| **19560** |  | **POS** | **0.002798146** |
| **19562** |  | **POS** | **0.002434045** |
| **19563** | **Melledonal B** | **POS** | **0.01068271** |
| **19564** | **Melledonal C** | **POS** | **0.026055909** |
| **19567** | **Mosinone A** | **POS** | **0.003870939** |
| **19569** |  | **NEG** | **0.034514517** |
| **19570** |  | **POS** | **0.013421042** |
| **19571** |  | **POS** | **2.93997E-05** |
| **19572** |  | **POS** | **4.47358E-05** |
| **19573** |  | **POS** | **0.003826514** |
| **19574** |  | **POS** | **0.029644281** |
| **19576** | **1-(2,3-Dichlorophenyl)ethanamine** | **POS** | **0.002136337** |
| **19577** |  | **POS** | **0.001387675** |
| **19579** |  | **POS** | **0.00713175** |
| **19581** |  | **POS** | **0.038309064** |
| **19582** |  | **POS** | **0.010937765** |
| **19583** |  | **POS** | **1.91261E-05** |
| **19584** |  | **POS** | **6.86673E-05** |
| **19587** |  | **POS** | **0.001390906** |
| **19593** | **Bisaramil** | **POS** | **0.000486691** |
| **19594** | **Renzapride** | **POS** | **0.032819296** |
| **19596** |  | **POS** | **0.000105916** |
| **19598** |  | **POS** | **0.030460356** |
| **19601** |  | **POS** | **0.01066562** |
| **19602** |  | **POS** | **1.57224E-05** |
| **19603** |  | **POS** | **0.000857728** |
| **19604** |  | **POS** | **0.017805578** |
| **19605** |  | **POS** | **0.002258407** |
| **19606** | **Ochratoxin C** | **POS** | **0.045969653** |
| **19607** | **Ethyl 3-[[(4-chlorophenyl)methyl-[(5-nitrothiophen-2-yl)methyl]amino]methyl]pyrrolidine-1-carboxylate** | **POS** | **7.78238E-05** |
| **19610** | **Copper glucote** | **POS** | **0.009071274** |
| **19612** |  | **POS** | **0.030208798** |
| **19613** |  | **POS** | **2.70906E-05** |
| **19614** |  | **POS** | **0.003222805** |
| **19615** |  | **POS** | **0.000178484** |
| **19616** |  | **POS** | **0.00022225** |
| **19617** |  | **POS** | **6.38377E-05** |
| **19618** |  | **POS** | **0.000525027** |
| **19619** | **Thifluzamide** | **POS** | **0.000491529** |
| **19620** | **TTF-1** | **POS** | **0.003145243** |
| **19622** |  | **POS** | **0.011028496** |
| **19623** | **DG(14:0/20:3(5Z,8Z,11Z)-O(14R,15S)/0:0)** | **POS** | **7.6314E-05** |
| **19625** | **Folcepri** | **POS** | **0.000355219** |
| **19628** |  | **NEG** | **0.000374134** |
| **19631** | **4-Bromophenol** | **POS** | **0.008564036** |
| **19632** |  | **POS** | **0.049449726** |
| **19633** |  | **POS** | **0.002472404** |
| **19635** |  | **POS** | **0.014858487** |
| **19638** | **Bismuth subsalicylate** | **POS** | **0.004465454** |
| **19640** |  | **POS** | **0.047467555** |
| **19642** |  | **POS** | **2.77474E-05** |
| **19643** |  | **POS** | **0.00035232** |
| **19644** |  | **POS** | **1.65408E-05** |
| **19645** |  | **POS** | **0.005768246** |
| **19646** | **Tetraprenyl-beta-curcumene** | **POS** | **0.005259484** |
| **19647** |  | **POS** | **0.014752994** |
| **19649** | **Fluphezine depot** | **POS** | **0.024243232** |
| **19652** |  | **POS** | **4.81931E-05** |
| **19653** |  | **NEG** | **0.002030118** |
| **19661** |  | **POS** | **0.000128282** |
| **19662** |  | **NEG** | **0.00953343** |
| **19663** |  | **NEG** | **6.04154E-05** |
| **19664** |  | **NEG** | **0.008543632** |
| **19665** |  | **NEG** | **0.000256682** |
| **19666** |  | **NEG** | **0.000421838** |
| **19667** |  | **NEG** | **0.024904612** |
| **19668** |  | **NEG** | **0.000252919** |
| **19669** |  | **NEG** | **0.003683517** |
| **19671** |  | **NEG** | **0.000580837** |
| **19678** |  | **NEG** | **0.000753822** |
| **19679** |  | **NEG** | **0.039884266** |
| **19680** |  | **NEG** | **0.001652489** |
| **19681** |  | **NEG** | **0.000322188** |
| **19683** |  | **NEG** | **2.17032E-05** |
| **19684** |  | **NEG** | **3.50381E-05** |
| **19688** | **Heptafluorobutyric anhydride** | **NEG** | **0.000946634** |
| **19689** |  | **NEG** | **0.02636842** |
| **19690** |  | **NEG** | **0.014259246** |
| **19697** | **apicidin** | **POS** | **0.0004466** |
| **19700** |  | **NEG** | **0.013205218** |
| **19701** |  | **NEG** | **0.011992694** |
| **19702** |  | **NEG** | **0.013010961** |
| **19704** |  | **NEG** | **0.004320043** |
| **19708** |  | **NEG** | **0.003615521** |
| **19709** |  | **NEG** | **0.000238117** |
| **19710** |  | **NEG** | **0.022682886** |
| **19712** |  | **NEG** | **0.001826861** |
| **19714** |  | **NEG** | **0.01432728** |
| **19716** |  | **NEG** | **0.003299689** |
| **19717** |  | **NEG** | **0.005988389** |
| **19718** |  | **NEG** | **0.001291564** |
| **19720** |  | **NEG** | **0.000202396** |
| **19723** |  | **NEG** | **0.000197589** |
| **19728** |  | **POS** | **0.000836301** |
| **19729** |  | **POS** | **0.001140458** |
| **19730** |  | **POS** | **0.02470623** |
| **19732** | **2-Iodophenol methyl ether** | **POS** | **0.001530541** |
| **19733** |  | **POS** | **0.000120568** |
| **19736** |  | **POS** | **0.01437963** |
| **19738** | **Bromucozole** | **POS** | **0.028665998** |
| **19739** | **Triforine** | **POS** | **0.000217252** |
| **19740** |  | **POS** | **0.028154968** |
| **19743** |  | **POS** | **0.000702003** |
| **19744** |  | **POS** | **0.000121284** |
| **19745** |  | **POS** | **0.008479668** |
| **19749** |  | **NEG** | **0.049059294** |
| **19750** |  | **NEG** | **0.010993756** |
| **19755** | **Methyl iodide** | **POS** | **0.029316907** |
| **19756** |  | **POS** | **0.000253088** |
| **19759** |  | **POS** | **0.001380208** |
| **19764** |  | **POS** | **0.00053233** |
| **19767** |  | **POS** | **0.005475579** |
| **19768** | **M1** | **POS** | **0.042631634** |
| **19770** |  | **POS** | **5.70906E-05** |
| **19772** |  | **POS** | **0.018637148** |
| **19773** |  | **POS** | **0.023185463** |
| **19775** |  | **POS** | **2.07602E-05** |
| **19776** | **Descarboxyethoxyloratadine** | **POS** | **0.009077449** |
| **19777** |  | **POS** | **0.0292777** |
| **19778** |  | **POS** | **0.040561073** |
| **19779** |  | **POS** | **0.01534107** |
| **19780** |  | **POS** | **0.007368291** |
| **19781** |  | **POS** | **0.000941334** |
| **19782** |  | **POS** | **0.020413696** |
| **19783** |  | **POS** | **0.002451587** |
| **19786** |  | **NEG** | **0.028082703** |
| **19787** |  | **NEG** | **0.034982301** |
| **19789** |  | **POS** | **0.020269894** |
| **19791** |  | **NEG** | **0.008250384** |
| **19792** |  | **NEG** | **0.000228497** |
| **19794** |  | **NEG** | **0.030039895** |
| **19795** |  | **NEG** | **0.012759085** |
| **19797** |  | **NEG** | **0.049607464** |
| **19798** |  | **NEG** | **0.001380095** |
| **19802** |  | **NEG** | **0.010042299** |
| **19803** |  | **NEG** | **0.000118331** |
| **19806** |  | **POS** | **5.35008E-05** |
| **19808** | **Crizotinib** | **POS** | **0.03212459** |
| **19809** | **Clozapine glucuronide** | **POS** | **0.000367399** |
| **19812** |  | **NEG** | **0.002375079** |
| **19820** | **Calcium diphosphate** | **NEG** | **9.9081E-06** |
| **19822** |  | **NEG** | **0.004114237** |
| **19823** |  | **NEG** | **0.045063006** |
| **19824** |  | **NEG** | **0.003945318** |
| **19825** |  | **NEG** | **0.01257927** |
| **19828** |  | **NEG** | **0.001451538** |
| **19829** |  | **NEG** | **0.026968273** |
| **19830** |  | **NEG** | **0.012053578** |
| **19831** | **beta-D-fructose 2,6-bisphosphate** | **NEG** | **0.004310251** |
| **19832** |  | **NEG** | **0.005707144** |
| **19836** |  | **NEG** | **0.002781184** |
| **19837** |  | **NEG** | **0.002625068** |
| **19838** |  | **NEG** | **0.001210334** |
| **19842** |  | **NEG** | **0.036524919** |
| **19844** |  | **NEG** | **0.019498289** |
| **19845** |  | **NEG** | **0.000977684** |
| **19846** |  | **NEG** | **0.000112179** |
| **19847** |  | **NEG** | **1.37325E-05** |
| **19848** |  | **NEG** | **0.000169982** |
| **19849** |  | **NEG** | **0.001123142** |
| **19851** |  | **NEG** | **0.039732449** |
| **19852** |  | **NEG** | **8.37353E-05** |
| **19853** |  | **NEG** | **0.00035912** |
| **19854** |  | **NEG** | **0.000838539** |
| **19855** |  | **NEG** | **0.003658868** |
| **19857** | **Cer(d20:1/22:6(5Z,8E,10Z,13Z,15E,19Z)-2OH(7S, 17S))** | **NEG** | **0.003758706** |
| **19858** |  | **POS** | **0.003206644** |
| **19859** | **Tetraphosphorus decaoxide** | **POS** | **0.032165566** |
| **19860** |  | **POS** | **0.041956421** |
| **19861** | **Meclastine** | **POS** | **0.009171583** |
| **19862** | **Ioxynil** | **POS** | **0.043519652** |
| **19863** |  | **NEG** | **0.000873908** |
| **19864** |  | **NEG** | **0.006828854** |
| **19868** |  | **NEG** | **0.000476819** |
| **19869** |  | **NEG** | **0.000193283** |
| **19872** |  | **NEG** | **0.000216413** |
| **19873** |  | **NEG** | **5.19303E-05** |
| **19875** |  | **NEG** | **0.012098248** |
| **19876** |  | **NEG** | **0.000460242** |
| **19878** | **N-[4-(4-Chlorophenyl)sulfonyl-4-(2,5-difluorophenyl)cyclohexyl]-1,1,1-trifluoromethanesulfonamide** | **NEG** | **0.000601156** |
| **19884** |  | **POS** | **0.00063535** |
| **19886** | **1-(2,2-Dichloroethyl)-1-nitrosourea** | **POS** | **0.000210993** |
| **19887** |  | **POS** | **0.000303922** |
| **19888** |  | **POS** | **0.002585154** |
| **19889** |  | **POS** | **0.002534173** |
| **19892** |  | **POS** | **0.000945276** |
| **19893** | **2,6-Dibromohydroquinone** | **POS** | **0.006784655** |
| **19894** |  | **POS** | **0.010789251** |
| **19898** |  | **POS** | **0.000242368** |
| **19901** |  | **POS** | **0.01975872** |
| **19902** | **Clemastine** | **POS** | **0.000244127** |
| **19903** |  | **POS** | **0.036448964** |
| **19905** |  | **POS** | **0.001527974** |
| **19906** |  | **POS** | **0.020797941** |
| **19907** |  | **POS** | **0.001038828** |
| **19911** |  | **NEG** | **0.000120873** |
| **19912** |  | **NEG** | **0.000784938** |
| **19913** |  | **NEG** | **0.007907204** |
| **19914** |  | **POS** | **0.006271381** |
| **19915** | **4-Bromo-3,5-cyclohexadiene-1,2-dione** | **POS** | **0.002209167** |
| **19918** |  | **POS** | **0.000878833** |
| **19919** |  | **POS** | **0.001620416** |
| **19920** |  | **POS** | **0.003150843** |
| **19921** |  | **POS** | **0.000308401** |
| **19922** |  | **POS** | **0.000717007** |
| **19923** |  | **POS** | **0.000535992** |
| **19924** |  | **POS** | **0.014365135** |
| **19926** |  | **POS** | **0.000965667** |
| **19927** |  | **POS** | **0.000824906** |
| **19928** | **Magnesium protoporphyrin** | **POS** | **4.70875E-05** |
| **19929** |  | **NEG** | **0.000506587** |
| **19931** |  | **NEG** | **0.015731672** |
| **19934** |  | **NEG** | **0.000208255** |
| **19935** |  | **NEG** | **0.019678061** |
| **19939** | **Clomeprop** | **POS** | **0.006119104** |
| **19942** |  | **NEG** | **0.000396427** |
| **19944** |  | **NEG** | **0.038516901** |
| **19945** | **Perfluoroethylcyclohexane** | **NEG** | **0.009304455** |
| **19949** |  | **POS** | **0.000510956** |
| **19951** | **4-O-Methylascochlorin** | **POS** | **0.005292334** |
| **19953** | **Nornitrogen mustard** | **NEG** | **0.001659174** |
| **19954** |  | **NEG** | **0.002540689** |
| **19959** |  | **NEG** | **0.000750203** |
| **19960** |  | **NEG** | **0.00188647** |
| **19961** |  | **NEG** | **0.00156209** |
| **19964** |  | **NEG** | **0.000178187** |
| **19965** |  | **NEG** | **0.000674355** |
| **19967** |  | **NEG** | **0.007706953** |
| **19968** |  | **NEG** | **0.000270642** |
| **19970** | **Octafluorocyclobutane** | **NEG** | **0.000829638** |
| **19971** | **D-Erythritol 4-phosphate** | **NEG** | **0.002915117** |
| **19972** |  | **NEG** | **0.002037033** |
| **19974** |  | **NEG** | **0.021609558** |
| **19975** |  | **NEG** | **0.020397696** |
| **19977** |  | **NEG** | **0.013580916** |
| **19978** |  | **NEG** | **0.004462819** |
| **19980** |  | **NEG** | **0.017777034** |
| **19983** |  | **NEG** | **2.21327E-05** |
| **19985** | **Iobenguane** | **NEG** | **0.00899229** |
| **19987** | **alpha-D-Ribose 1,2-cyclic phosphate 5-phosphate** | **NEG** | **0.015838524** |
| **19990** |  | **NEG** | **0.001352444** |
| **19991** |  | **NEG** | **9.71106E-05** |
| **19993** |  | **NEG** | **0.01741938** |
| **19994** |  | **NEG** | **0.006343645** |
| **19997** |  | **NEG** | **0.000871958** |
| **20002** |  | **NEG** | **0.000671891** |
| **20003** |  | **NEG** | **0.02127898** |
| **20004** |  | **NEG** | **0.010948458** |
| **20005** | **2,3-Bis(2,4-dichlorophenoxy)butanedioic acid** | **NEG** | **0.000337034** |
| **20007** |  | **NEG** | **0.037290501** |
| **20008** |  | **NEG** | **0.002896402** |
| **20010** |  | **NEG** | **0.000414691** |
| **20011** |  | **NEG** | **0.000229302** |
| **20012** |  | **NEG** | **0.000307095** |
| **20014** |  | **POS** | **3.65805E-05** |
| **20015** |  | **POS** | **0.036548595** |
| **20016** | **Metrizoic acid** | **POS** | **0.016500599** |
| **20017** |  | **POS** | **0.019316347** |
| **20018** | **Oxalate** | **POS** | **0.00054615** |
| **20019** |  | **POS** | **0.041185988** |
| **20020** | **5-Nitrofurfural** | **POS** | **0.001459909** |
| **20022** |  | **POS** | **0.043676175** |
| **20026** | **Uracil mustard** | **POS** | **0.037583024** |
| **20029** |  | **POS** | **0.008429521** |
| **20030** |  | **POS** | **0.014950294** |
| **20032** |  | **POS** | **0.004470807** |
| **20033** |  | **POS** | **0.006215124** |
| **20034** |  | **POS** | **0.001991616** |
| **20035** | **3,3',4',5-Tetrachlorosalicylanilide** | **POS** | **0.023584811** |
| **20037** |  | **POS** | **0.003730855** |
| **20038** | **Tetrachlorvinphos** | **POS** | **0.003311196** |
| **20039** |  | **POS** | **0.003195532** |
| **20040** |  | **POS** | **0.00058806** |
| **20041** |  | **POS** | **0.001699309** |
| **20042** |  | **POS** | **0.001757302** |
| **20043** |  | **POS** | **0.005538988** |
| **20044** |  | **POS** | **0.042056928** |
| **20045** |  | **POS** | **0.004100577** |
| **20046** |  | **POS** | **0.003187481** |
| **20048** |  | **POS** | **0.034611708** |
| **20049** | **Perfluorodichlorooctane** | **POS** | **0.002340898** |
| **20050** |  | **POS** | **0.007781698** |
| **20051** |  | **POS** | **4.44972E-05** |
| **20052** |  | **POS** | **0.012640501** |
| **20053** |  | **POS** | **0.022782797** |
| **20054** |  | **POS** | **0.00701357** |
| **20056** | **131-oxo-magnesium-protoporphyrin IX 13-monomethyl ester** | **POS** | **0.005780165** |
| **20058** |  | **NEG** | **0.005685076** |
| **20059** |  | **NEG** | **0.000166543** |
| **20060** |  | **NEG** | **0.037821106** |
| **20062** | **1,2,3,5-Tetrachloro-4-methoxybenzene** | **POS** | **0.004330233** |
| **20063** | **D-Mannitol 1-phosphate** | **POS** | **0.009432712** |
| **20065** |  | **POS** | **0.000294259** |
| **20068** |  | **POS** | **0.001388299** |
| **20071** |  | **POS** | **0.015532299** |
| **20072** |  | **NEG** | **0.006748792** |
| **20080** |  | **NEG** | **0.001961151** |
| **20082** |  | **POS** | **0.000149556** |
| **20085** |  | **NEG** | **0.04075894** |
| **20088** |  | **NEG** | **0.002817917** |
| **20089** |  | **NEG** | **0.00437009** |
| **20091** |  | **NEG** | **0.00626221** |
| **20099** |  | **POS** | **0.004150132** |
| **20100** |  | **POS** | **0.000688058** |
| **20101** |  | **POS** | **0.001958183** |
| **20102** |  | **POS** | **0.041860013** |
| **20103** |  | **POS** | **0.029830013** |
| **20104** |  | **POS** | **0.006810971** |
| **20107** | **sn-Glycerol 3-phosphate** | **POS** | **5.00057E-05** |
| **20108** |  | **POS** | **0.00838969** |
| **20111** | **(2R)-O-Phospho-3-sulfolactate** | **POS** | **0.025078998** |
| **20113** |  | **POS** | **0.000399422** |
| **20115** |  | **POS** | **0.004973521** |
| **20116** |  | **POS** | **0.002026492** |
| **20117** |  | **POS** | **0.005828352** |
| **20118** |  | **POS** | **0.014078004** |
| **20119** |  | **POS** | **0.005127058** |
| **20121** |  | **POS** | **0.003151437** |
| **20123** |  | **POS** | **0.000825216** |
| **20124** |  | **POS** | **0.000792458** |
| **20128** |  | **POS** | **0.00070966** |
| **20129** |  | **POS** | **0.000131461** |
| **20130** |  | **POS** | **0.000168413** |
| **20131** |  | **POS** | **0.00013367** |
| **20132** |  | **POS** | **0.020377588** |
| **20133** |  | **POS** | **0.000369503** |
| **20136** |  | **POS** | **0.00815328** |
| **20138** |  | **POS** | **0.00061016** |
| **20139** |  | **POS** | **0.001988791** |
| **20140** |  | **POS** | **0.000406214** |
| **20141** |  | **POS** | **0.00405561** |
| **20142** |  | **POS** | **0.000858165** |
| **20147** |  | **POS** | **0.004207516** |
| **20148** | **Curium** | **POS** | **0.042353075** |
| **20149** |  | **POS** | **0.001425593** |
| **20150** |  | **POS** | **2.00349E-05** |
| **20151** |  | **POS** | **0.003801328** |
| **20152** |  | **POS** | **2.28571E-05** |
| **20153** | **20-O-Methyl-19-chloroproansamitocin** | **POS** | **0.004754659** |
| **20154** | **Benzamide, 5-((1,5-bis(4-methoxyphenyl)-1H-pyrazol-3-yl)dimethoxymethyl)-2-chloro-** | **POS** | **0.000827547** |
| **20155** |  | **POS** | **5.93666E-05** |
| **20156** |  | **NEG** | **0.041335544** |
| **20157** |  | **POS** | **0.027111622** |
| **20160** |  | **POS** | **0.006146895** |
| **20173** | **Hapten** | **NEG** | **0.013090917** |
| **20175** |  | **POS** | **0.032410842** |
| **20176** |  | **POS** | **0.046774112** |
| **20177** |  | **POS** | **0.000317554** |
| **20181** |  | **POS** | **9.89805E-05** |
| **20182** |  | **POS** | **0.000740236** |
| **20184** | **Dimethylcarbamoyl chloride** | **POS** | **0.000591934** |
| **20185** |  | **POS** | **0.0002125** |
| **20186** |  | **POS** | **0.000673251** |
| **20187** |  | **POS** | **2.50183E-05** |
| **20188** |  | **POS** | **8.14474E-05** |
| **20189** | **Acetyl phosphate** | **POS** | **0.000841211** |
| **20190** | **Bis(2-chloroethyl)ether** | **POS** | **0.002019084** |
| **20191** |  | **POS** | **0.001404818** |
| **20193** |  | **POS** | **4.40532E-05** |
| **20194** |  | **POS** | **0.000296951** |
| **20196** |  | **POS** | **0.002334899** |
| **20197** |  | **POS** | **5.32816E-05** |
| **20198** |  | **POS** | **0.001011866** |
| **20200** |  | **POS** | **0.001329024** |
| **20201** |  | **POS** | **0.009432652** |
| **20202** |  | **POS** | **0.001617917** |
| **20204** | **O-Phospho-L-serine** | **POS** | **0.000410104** |
| **20206** |  | **POS** | **0.02924673** |
| **20207** | **Benzoyl phosphate** | **POS** | **0.000834876** |
| **20208** | **Cytosine phosphate** | **POS** | **0.005195624** |
| **20209** |  | **POS** | **0.000909421** |
| **20210** |  | **POS** | **0.000597172** |
| **20211** |  | **POS** | **0.021035227** |
| **20212** |  | **POS** | **0.005603325** |
| **20213** | **D-Ribose 5-phosphate** | **POS** | **0.01453243** |
| **20215** |  | **POS** | **0.006310166** |
| **20220** |  | **POS** | **0.007453533** |
| **20222** |  | **POS** | **0.000154732** |
| **20224** |  | **POS** | **0.007888878** |
| **20225** |  | **POS** | **3.83581E-05** |
| **20232** |  | **POS** | **0.005326578** |
| **20233** |  | **POS** | **0.0021948** |
| **20234** |  | **POS** | **0.003938902** |
| **20238** |  | **POS** | **9.11889E-05** |
| **20239** |  | **POS** | **0.002703926** |
| **20241** |  | **POS** | **3.83795E-05** |
| **20243** |  | **POS** | **0.009113432** |
| **20246** |  | **POS** | **0.002176593** |
| **20247** |  | **POS** | **0.000798514** |
| **20248** |  | **POS** | **0.00830962** |
| **20249** | **Methylenediphosphonic acid** | **POS** | **0.001287473** |
| **20250** |  | **POS** | **0.000230982** |
| **20251** |  | **POS** | **1.25466E-05** |
| **20253** |  | **POS** | **0.000231572** |
| **20255** | **Selenocysteine seleninic acid** | **POS** | **0.001996509** |
| **20256** |  | **POS** | **0.005905184** |
| **20257** |  | **POS** | **0.016551093** |
| **20258** |  | **POS** | **0.027332274** |
| **20261** | **2-Oxo-3-hydroxy-4-phosphobutanoate** | **POS** | **0.004154449** |
| **20265** |  | **POS** | **0.00071838** |
| **20266** |  | **POS** | **0.0391602** |
| **20267** |  | **POS** | **0.007595981** |
| **20270** |  | **POS** | **0.015719163** |
| **20271** |  | **POS** | **0.012369868** |
| **20272** |  | **POS** | **0.004837458** |
| **20276** |  | **POS** | **4.28031E-05** |
| **20282** | **Mazaticol hydrochloride** | **NEG** | **0.001194734** |
| **20284** |  | **NEG** | **0.038914097** |
| **20285** |  | **NEG** | **0.010496108** |
| **20295** |  | **POS** | **0.000735602** |
| **20297** |  | **POS** | **0.042671336** |
| **20298** | **Tricrozarin A** | **POS** | **0.014559107** |
| **20307** |  | **POS** | **0.021144957** |
| **20311** |  | **POS** | **0.006911531** |
| **20312** |  | **POS** | **0.003563566** |
| **20326** |  | **NEG** | **0.027325852** |
| **20340** |  | **NEG** | **0.000153025** |
| **20363** |  | **NEG** | **0.033618184** |
| **20364** | **DHAP(6:0)** | **NEG** | **0.026040974** |
| **20385** |  | **NEG** | **0.004044339** |
| **20386** | **Calcium L-aspartate** | **POS** | **0.034727441** |
| **20409** | **Glutaminylhistidine** | **POS** | **0.00151526** |
| **20414** |  | **NEG** | **0.029237038** |
| **20428** |  | **NEG** | **0.033797267** |
| **20456** |  | **POS** | **0.009461806** |
| **20458** | **Endothion** | **POS** | **0.015439597** |
| **20459** |  | **NEG** | **0.020023765** |
| **20460** |  | **NEG** | **0.028371233** |
| **20467** | **Glyoxylate** | **POS** | **0.011585742** |
| **20468** |  | **POS** | **0.002566484** |
| **20470** |  | **POS** | **0.010098539** |
| **20474** | **3-Sulfocatechol** | **POS** | **0.040930533** |
| **20476** |  | **POS** | **0.004988451** |
| **20477** |  | **POS** | **0.004028442** |
| **20478** |  | **POS** | **0.005960053** |
| **20479** |  | **POS** | **0.004967014** |
| **20481** |  | **POS** | **0.013475603** |
| **20485** | **Dihydrotriazole** | **POS** | **0.000548976** |
| **20487** |  | **POS** | **0.001873901** |
| **20492** |  | **POS** | **0.025377658** |
| **20497** |  | **POS** | **0.015149407** |
| **20498** | **cis-(Homo)3-aconitate** | **POS** | **0.029338083** |
| **20502** |  | **POS** | **0.025542938** |
| **20503** |  | **POS** | **0.010736578** |
| **20506** |  | **POS** | **0.009632858** |
| **20507** |  | **POS** | **0.024205337** |
| **20508** |  | **POS** | **0.004297546** |
| **20512** |  | **NEG** | **0.041570928** |
| **20531** |  | **POS** | **0.000257649** |
| **20533** | **3-Hydroxykynurenine** | **POS** | **0.001923599** |
| **20534** | **Porphobilinogen** | **POS** | **0.017233804** |
| **20536** |  | **POS** | **0.001231982** |
| **20538** |  | **NEG** | **0.036064079** |
| **20563** |  | **POS** | **0.005435358** |
| **20565** |  | **POS** | **0.009913055** |
| **20567** | **S-Methyl-3-phospho-1-thio-D-glycerate** | **POS** | **0.022763724** |
| **20568** | **Endothal-disodium** | **POS** | **0.009895017** |
| **20569** |  | **POS** | **0.005156212** |
| **20570** | **N-Acetoxy-IQ** | **POS** | **0.000951485** |
| **20571** | **Mecadox** | **POS** | **0.002380539** |
| **20576** |  | **POS** | **0.003201971** |
| **20582** |  | **POS** | **0.029603478** |
| **20584** |  | **POS** | **0.026225338** |
| **20585** |  | **POS** | **0.008065549** |
| **20587** | **Sulfite** | **POS** | **0.001191379** |
| **20588** |  | **POS** | **0.002830329** |
| **20590** |  | **POS** | **0.000336627** |
| **20593** |  | **POS** | **0.002079823** |
| **20594** | **Calcium carbote** | **POS** | **0.009982898** |
| **20597** | **Hydroxypyruvate** | **POS** | **0.000175335** |
| **20600** | **Catechol** | **POS** | **0.015811076** |
| **20609** | **Sodium sorbate** | **POS** | **0.028614741** |
| **20615** |  | **POS** | **0.012538873** |
| **20616** |  | **POS** | **0.028593488** |
| **20620** |  | **POS** | **0.031969524** |
| **20624** |  | **POS** | **0.013453829** |
| **20625** |  | **POS** | **0.046434901** |
| **20626** | **Sodium n-alkylbenzenesulfonate** | **POS** | **0.000110202** |
| **20629** |  | **POS** | **0.011503631** |
| **20632** | **Tyrphostin A25** | **POS** | **0.0216762** |
| **20636** |  | **POS** | **0.043800524** |
| **20637** |  | **POS** | **0.019310659** |
| **20638** | **Sodium potassium tartrate** | **POS** | **0.000451623** |
| **20642** |  | **POS** | **0.04716139** |
| **20644** |  | **POS** | **1.36289E-05** |
| **20645** | **(Z)-6,7-Dichloro-3-(hydroxyimino)indolin-2-one** | **POS** | **0.031456325** |
| **20647** | **Diflunisal** | **POS** | **0.003107454** |
| **20648** | **Atoxin a(s)** | **POS** | **0.012657392** |
| **20652** |  | **POS** | **0.00662363** |
| **20657** |  | **POS** | **0.024386235** |
| **20668** | **1,1,1,2-Tetrafluoroethane** | **POS** | **0.008250911** |
| **20671** |  | **POS** | **0.000545452** |
| **20672** |  | **POS** | **0.001375891** |
| **20682** |  | **POS** | **0.014662681** |
| **20693** | **Selenomethionine Se-oxide** | **POS** | **0.001381492** |
| **20694** |  | **POS** | **0.026199854** |
| **20696** | **2-Amino-4-hydroxy-6-(D-erythro-1,2,3-trihydroxypropyl)-7,8-dihydropteridine** | **POS** | **0.041811581** |
| **20697** |  | **POS** | **0.003875628** |
| **20698** | **Taurine glutamate** | **POS** | **0.002918803** |
| **20699** |  | **POS** | **0.003864085** |
| **20701** |  | **NEG** | **0.018202299** |
| **20709** |  | **NEG** | **0.020164419** |
| **20714** | **Uracil** | **POS** | **0.019146077** |
| **20715** | **thiazolinedione** | **POS** | **0.006621829** |
| **20716** | **Sodium hydrogen sulfate** | **POS** | **0.010549587** |
| **20720** |  | **POS** | **0.004957367** |
| **20727** |  | **POS** | **0.03653211** |
| **20744** | **Methylphosphote** | **POS** | **0.034422335** |
| **20745** | **Tetrafluoroethylene** | **POS** | **0.007986043** |
| **20749** |  | **POS** | **0.012074115** |
| **20751** |  | **POS** | **0.001544288** |
| **20756** | **1-Mononitroglycerin** | **POS** | **0.035655438** |
| **20757** |  | **POS** | **0.005088611** |
| **20765** | **Dichlorotriazine** | **POS** | **0.044099407** |
| **20767** |  | **POS** | **0.001333322** |
| **20769** |  | **POS** | **0.020038765** |
| **20770** | **Succinyl chloride** | **POS** | **0.027137522** |
| **20775** | **2,3-Dichloroaniline** | **POS** | **0.000344776** |
| **20778** |  | **POS** | **0.012208499** |
| **20779** |  | **POS** | **0.000723427** |
| **20780** |  | **POS** | **0.008375669** |
| **20783** |  | **POS** | **0.015085255** |
| **20789** |  | **POS** | **0.002481533** |
| **20793** |  | **POS** | **0.030508677** |
| **20797** |  | **POS** | **0.005862267** |
| **20799** |  | **POS** | **8.47754E-05** |
| **20800** | **N,N-dihydroxy-L-tyrosine** | **POS** | **0.000764853** |
| **20801** |  | **POS** | **0.004815391** |
| **20803** |  | **POS** | **0.000365075** |
| **20807** | **1,3,5-Triazin-2(1H)-one, 4-amino-1-(2-deoxy-beta-D-erythro-pentofuranosyl)-** | **POS** | **0.032652405** |
| **20808** |  | **POS** | **0.0156686** |
| **20810** |  | **POS** | **0.001404418** |
| **20813** |  | **POS** | **0.001170646** |
| **20814** | **4-Demethylpremithramycinone** | **POS** | **0.011018928** |
| **20818** |  | **POS** | **0.002151495** |
| **20819** |  | **POS** | **0.00039893** |
| **20825** |  | **POS** | **0.034703079** |
| **20827** | **Isoxaflutole** | **POS** | **0.000854992** |
| **20830** |  | **NEG** | **0.025144601** |
| **20832** |  | **POS** | **0.001878541** |
| **20833** |  | **POS** | **0.006265386** |
| **20839** | **Bicarbonate carbon** | **POS** | **0.028144192** |
| **20843** |  | **NEG** | **0.028275188** |
| **20864** | **1,2,4-Triazole** | **POS** | **0.000643981** |
| **20870** |  | **POS** | **0.027898683** |
| **20871** |  | **POS** | **0.021460512** |
| **20872** |  | **POS** | **0.001780132** |
| **20874** |  | **POS** | **0.000160371** |
| **20876** |  | **POS** | **0.044558801** |
| **20881** |  | **POS** | **0.003381198** |
| **20884** |  | **POS** | **0.039626056** |
| **20888** |  | **POS** | **0.031983641** |
| **20889** |  | **POS** | **0.011746732** |
| **20897** |  | **POS** | **4.97047E-05** |
| **20900** |  | **POS** | **0.003915195** |
| **20903** |  | **POS** | **0.000564701** |
| **20911** |  | **POS** | **0.000315002** |
| **20918** | **4-Fluoro-7-nitrobenzofurazan** | **POS** | **0.014657275** |
| **20919** | **(1S,3R)-3-(2,2-Dichloroethenyl)-2,2-dimethylcyclopropanecarboxylate** | **POS** | **0.005054796** |
| **20930** |  | **POS** | **0.000195368** |
| **20932** | **4-Bromophenylthiourea** | **POS** | **0.005408043** |
| **20939** | **Pyrazimide** | **POS** | **0.00175914** |
| **20942** |  | **POS** | **0.008022169** |
| **20943** |  | **POS** | **0.001480325** |
| **20945** |  | **POS** | **0.017277275** |
| **20957** |  | **POS** | **0.003262554** |
| **20960** | **Ethyl methylphosphonofluoridate** | **POS** | **0.001769634** |
| **20963** |  | **POS** | **0.001772455** |
| **20971** |  | **POS** | **7.43625E-05** |
| **20980** |  | **POS** | **0.003574999** |
| **20991** |  | **POS** | **0.013521065** |
| **20992** | **[Nitrilotris(methylene)]trisphosphonic acid** | **POS** | **0.023471872** |
| **21000** |  | **POS** | **0.038644752** |
| **21006** | **Dexelvucitabine** | **POS** | **0.006504008** |
| **21013** |  | **POS** | **0.00733838** |
| **21014** |  | **POS** | **0.023034799** |
| **21015** |  | **POS** | **0.021078843** |
| **21038** |  | **POS** | **0.008740665** |
| **21040** |  | **POS** | **0.024383751** |
| **21041** | **3-Fluoro-D-alanine** | **POS** | **0.008110316** |
| **21043** |  | **POS** | **0.033795165** |
| **21044** |  | **POS** | **0.016940122** |
| **21056** |  | **POS** | **0.000669465** |
| **21067** |  | **POS** | **0.04368134** |
| **21068** |  | **POS** | **0.006226441** |
| **21070** | **Vanillic acid 4-O-sulfate** | **POS** | **0.013016496** |
| **21085** | **Polyvidone** | **POS** | **0.02137621** |
| **21101** |  | **POS** | **0.000389286** |
| **21110** |  | **NEG** | **0.016920272** |
| **21122** |  | **POS** | **0.002441771** |
| **21123** | **Fluazifop** | **POS** | **0.001417416** |
| **21132** |  | **POS** | **0.003040214** |
| **21147** |  | **POS** | **0.019223576** |
| **21151** |  | **POS** | **0.017343898** |
| **21156** | **Pentafluorophenyl isothiocyanate** | **POS** | **0.042006945** |
| **21170** | **(E)-2-(2-Furyl)-3-(5-nitro-2-furyl)acrylamide** | **POS** | **0.00211217** |
| **21177** |  | **POS** | **0.043216844** |
| **21179** | **4-Amino-2-methyl-5-(phosphooxymethyl)pyrimidine** | **POS** | **0.049571425** |
| **21180** | **Psicofuranine** | **POS** | **0.023780499** |
| **21181** |  | **POS** | **0.001346344** |
| **21183** |  | **POS** | **0.004193064** |
| **21184** |  | **POS** | **0.004792412** |
| **21188** | **Diclobutrazol** | **POS** | **0.010749007** |
| **21196** |  | **POS** | **0.012589675** |
| **21202** |  | **NEG** | **0.002668825** |
| **21209** |  | **POS** | **8.42854E-05** |
| **21213** |  | **POS** | **0.000528414** |
| **21217** | **1-alkyl-2-acylglycerophosphoethanolamine** | **POS** | **0.001335368** |
| **21227** | **1-Methylseleno-N-acetyl-D-galactosamine** | **POS** | **0.002200856** |
| **21231** |  | **POS** | **0.000904744** |
| **21232** |  | **POS** | **0.005783764** |
| **21235** | **3-(3,4-Dihydroxyphenyl)lactate** | **POS** | **0.007575683** |
| **21237** |  | **POS** | **0.026483601** |
| **21240** |  | **POS** | **0.000173813** |
| **21244** |  | **POS** | **0.015411378** |
| **21246** |  | **POS** | **0.029856447** |
| **21250** | **3,5-Dinitrosalicylic acid** | **POS** | **0.020015303** |
| **21252** |  | **POS** | **0.041812814** |
| **21265** | **2-Iodophenol methyl ether** | **POS** | **0.006285761** |
| **21266** |  | **POS** | **0.007927919** |
| **21272** | **2-(Phosphonomethyl)pentanedioic acid** | **POS** | **0.006228982** |
| **21274** |  | **NEG** | **0.044258851** |
| **21283** | **1,3,5-Trinitrobenzene** | **POS** | **0.046366996** |
| **21288** | **Dicarbonyl methylglyoxal** | **NEG** | **0.029178381** |
| **21317** |  | **POS** | **0.001553266** |
| **21319** |  | **POS** | **0.001422234** |
| **21320** | **Dichlorotriazine** | **POS** | **0.017601142** |
| **21321** |  | **POS** | **6.87021E-05** |
| **21323** |  | **POS** | **0.040714884** |
| **21335** |  | **POS** | **1.5086E-05** |
| **21336** |  | **POS** | **0.006224023** |
| **21338** |  | **POS** | **0.010115207** |
| **21339** | **4-Maleylacetoacetate** | **POS** | **0.001047197** |
| **21343** |  | **POS** | **0.001430706** |
| **21346** | **Metoxadiazone** | **POS** | **0.005555395** |
| **21349** |  | **POS** | **0.001001668** |
| **21352** |  | **POS** | **0.004860846** |
| **21353** | **Benzoic acid 2-(acetyloxy)-3-[(nitrooxy)methyl]phenyl ester** | **POS** | **0.003453946** |
| **21358** | **1-Ethoxymethyl-5-fluorouracil** | **POS** | **0.010222882** |
| **21359** |  | **POS** | **0.003648761** |
| **21368** |  | **POS** | **0.003861071** |
| **21370** |  | **POS** | **0.004163354** |
| **21371** |  | **POS** | **0.001045496** |
| **21381** |  | **POS** | **0.000817119** |
| **21383** |  | **POS** | **0.013416572** |
| **21389** |  | **POS** | **0.009401138** |
| **21393** |  | **POS** | **0.018084909** |
| **21394** | **Calcium L-aspartate** | **POS** | **0.032824857** |
| **21395** | **sn-Glycerol 3-phosphate** | **POS** | **0.000667532** |
| **21396** |  | **POS** | **0.011938231** |
| **21397** |  | **POS** | **0.028423749** |
| **21402** | **Alafosfalin** | **POS** | **0.000951663** |
| **21403** | **Iodobenzene** | **POS** | **0.017852107** |
| **21404** |  | **POS** | **0.001420637** |
| **21407** |  | **POS** | **0.008200492** |
| **21409** |  | **POS** | **0.011638255** |
| **21410** | **Bicarbonate carbon** | **POS** | **0.022370381** |
| **21411** | **Taurine glutamate** | **POS** | **0.001638656** |
| **21413** |  | **POS** | **0.000531018** |
| **21415** |  | **NEG** | **0.041087759** |
| **21440** |  | **POS** | **0.029251231** |
| **21443** |  | **POS** | **0.000572439** |
| **21446** | **Diloxanide furoate** | **POS** | **0.000475686** |
| **21471** |  | **NEG** | **0.046178789** |
| **21482** |  | **NEG** | **0.035810402** |
| **21484** | **L-Fuculose 1-phosphate** | **NEG** | **0.005251419** |
| **21493** | **Inosine-5'-carboxylate** | **NEG** | **0.013770087** |
| **21508** |  | **POS** | **0.018259037** |
| **21509** | **5,6-Dihydro-5-fluorouracil** | **POS** | **2.31836E-05** |
| **21516** | **2,3-Dichloroaniline** | **POS** | **0.007939952** |
| **21517** |  | **POS** | **0.01538098** |
| **21521** |  | **POS** | **0.015610626** |
| **21522** |  | **POS** | **0.002999623** |
| **21523** |  | **POS** | **0.000635017** |
| **21528** |  | **POS** | **0.023689978** |
| **21530** |  | **POS** | **0.015857205** |
| **21541** |  | **POS** | **0.038980005** |
| **21546** |  | **POS** | **0.016630389** |
| **21547** |  | **POS** | **0.023976863** |
| **21548** |  | **POS** | **0.02763238** |
| **21549** | **N-Trimethyl-2-aminoethylphosphote** | **POS** | **0.011385208** |
| **21551** | **cis-Aconitate** | **POS** | **0.001760436** |
| **21554** | **Arsenobetaine** | **POS** | **0.006298076** |
| **21555** | **O-Phospho-L-serine** | **POS** | **0.025509422** |
| **21556** |  | **POS** | **0.002958414** |
| **21557** |  | **POS** | **0.001194751** |
| **21560** |  | **POS** | **0.02961631** |
| **21564** | **Sodium potassium tartrate** | **POS** | **0.003065571** |
| **21565** |  | **POS** | **0.00204578** |
| **21566** |  | **POS** | **0.015830716** |
| **21572** | **Dimethylarsinous acid** | **POS** | **0.034761754** |
| **21588** | **Phosphoguanidinoacetate** | **POS** | **0.031095088** |
| **21589** |  | **POS** | **0.004382626** |
| **21591** | **3-Hydroxykynurenine** | **POS** | **0.024614332** |
| **21592** |  | **POS** | **0.007150336** |
| **21595** |  | **POS** | **0.006233903** |
| **21597** |  | **NEG** | **0.032253681** |
| **21602** |  | **POS** | **0.00017009** |
| **21603** | **Orthophosphate** | **POS** | **0.020196881** |
| **21605** |  | **POS** | **0.046595564** |
| **21606** |  | **POS** | **0.026864593** |
| **21610** |  | **POS** | **0.032368578** |
| **21615** |  | **POS** | **0.014617803** |
| **21616** |  | **POS** | **0.006817794** |
| **21617** |  | **POS** | **0.001954213** |
| **21619** |  | **POS** | **0.002860497** |
| **21620** |  | **POS** | **0.047712263** |
| **21623** | **Cycloguanil hydrochloride** | **POS** | **0.014239544** |
| **21624** |  | **POS** | **0.00408821** |
| **21625** |  | **POS** | **0.00057852** |
| **21627** |  | **POS** | **0.014564011** |
